# Supplementary material
Source: PubMed Central journal article supplement (PMC2596343)

## **Supplementary Data**

## SUPPLEMENTARY TABLES

**Supplementary Table 1: Targets and cleavage sites identified in a proteome-wide COFRADIC analysis with caspase-1.** The complete list of internally located, tri-deuteroacetylated peptides cleaved after residues other than Asp in P<sub>1</sub> that were uniquely identified in the digested proteome of recombinant caspase-1 treated mouse Mf/f4 lysates, is shown. Protein names are identified by using the SIB BLAST network service, and the accession numbers are according to the UniProtKB/Swiss-Prot database. The cleavage sites represent the amino acids preceding the identified peptide (i.e. P4 – P1) as well as the P1'. Start/end, sequence, modified sequence, number of identified spectra (spectra #), Mascot ion score of highest scoring spectra, m/z, z, error (Da), e-value, threshold and  $\Delta$  threshold of the identified spectra are given.

| Accession Nr. | Protein name                 | Sequence                | Modified sequence                    | Cleavage site                           |
|---------------|------------------------------|-------------------------|--------------------------------------|-----------------------------------------|
| O08756        | HADH2                        | TIENPFLNGEIVR           | AcD3-TIENPFLN<Dam>GEVIR-COOH         | HLVQ <sub>237</sub> -T <sub>238</sub>   |
| Q01WR3        | ASCC2                        | QVGANDADSDDELISR        | AcD3-Q<Dam>VGANDADSDDELISR-COOH      | YDGN <sub>16</sub> -Q <sub>617</sub>    |
| Q9JKX6        | Nudt5                        | FPAGFIEDGESPEAAALR      | AcD3-FPAGFIEDGESPEAAALR-COOH         | YCLE <sub>92</sub> -F <sub>93</sub>     |
| P17427        | Ap2a2                        | VAPLAPGSEDNFAR          | AcD3-VAPLAPGSEDNFAR-COOH             | SASA <sub>693</sub> -V <sub>694</sub>   |
| Q7TQH0        | Atxn2l                       | SVPGQQGKYR              | AcD3-SVPGQQGKYR-COOH                 | PVSN <sub>735</sub> -S <sub>739</sub>   |
| P01887        | Beta-2-microglobulin         | KTIPIQIVYSR             | AcD3-KTIPIQIVYSR-COOH                | YAIQ <sub>22</sub> -K <sub>23</sub>     |
| Q88TV2        | Cpsf7                        | ATPSENLVPSAR            | AcD3-ATPSENLVPSAR-COOH               | ADGR <sub>201</sub> -A <sub>202</sub>   |
| P97310        | MCM2                         | GLALDDEDVEELTASQR       | AcD3-GLALDDEDVEELTASQR-COOH          | YEAE <sub>93</sub> -G <sub>94</sub>     |
| P60898        | RNA polymerase II subunit B9 | YEPGFVIGR               | AcD3-YEPGFVIGR-COOH                  | PDGT <sub>6</sub> -Y <sub>7</sub>       |
| Q9WUJ2        | eIF-4H                       | KEALTYDGALLGDR          | AcD3-KEALTYDGALLGDR-COOH             | VDSL <sub>94</sub> -K <sub>95</sub>     |
| P97323        | Fbpase 3                     | EFIMVER                 | AcD3-EFIMVER-COOH                    | PSIG <sub>39</sub> -E <sub>40</sub>     |
| P49710        | LckBP1                       | GFGGKYGVER              | AcD3-GFGGKYGVER-COOH                 | DYSH <sub>118</sub> -G <sub>119</sub>   |
| P51859        | HDFG                         | GPPAEEEEEEEEAAKEEAQAQGV | AcD3-GPPAEEEEEEEEAAKEEAQAQGV-COOH    | DSGQ <sub>208</sub> -G <sub>209</sub>   |
| Q02780        | NF1-A                        | GEEPFYTGQGR             | AcD3-GEEPFYTGQGR-COOH                | MDSP <sub>311</sub> -G <sub>312</sub>   |
| Q9D903        | EBP2                         | LASDQELQDAFSR           | AcD3-LASDQELQDAFSR-COOH              | SDAC <sub>16</sub> -L <sub>17</sub>     |
| Q8K3X4        | Protein C14orf4 homolog      | TKPAVLAAPSGLER          | AcD3-TKPAVLAAPSGLER-COOH             | VDGS <sub>115</sub> -T <sub>116</sub>   |
| P26350        | Prothymosin alpha            | EGDGEEDGDEDEEAAPTGKR    | AcD3-EGDGEEDGDEDEEAAPTGKR-COOH       | EEEE <sub>67</sub> -E <sub>68</sub>     |
| Q9QZS2        | RING finger protein 4        | VVSSDDEELSR             | AcD3-VVSSDDEELSR-COOH                | ADSC <sub>95</sub> -V <sub>96</sub>     |
| Q60710        | MG11                         | STDPQLSEAQSILR          | AcD3-STDPQLSEAQSILR-COOH             | EVLH <sub>444</sub> -S <sub>445</sub>   |
| Q8BT18        | Srrm2                        | MAPALSGANLTSPR          | AcD3-M<Mox>APALSGANLTSPR-COOH        | SSSR <sub>2323</sub> -M <sub>2324</sub> |
| P27048        | snRNP-B                      | GENLVSMITVEGPPPKDTGIAR  | AcD3-GENLVSM<Mox>TVEGPPPKDTGIAR-COOH | VLLR <sub>73</sub> -G <sub>74</sub>     |
| P26369        | U2AF2                        | TPTPVPVWGSQMTR          | AcD3-TPTPVPVWGSQM<Mox>TR-COOH        | GLAV <sub>132</sub> -T <sub>133</sub>   |
| O54988        | STE20-related kinase         | GEAAATEVDLER            | AcD3-GEAAATEVDLER-COOH               | LGSE <sub>667</sub> -G <sub>668</sub>   |
| O35988        | Syndecan-4                   | EVIDPQDLLEGR            | AcD3-EVIDPQDLLEGR-COOH               | IRET <sub>29</sub> -E <sub>30</sub>     |
| P26039        | Talin-1                      | SPKSTVLQQQYNR           | AcD3-SPKSTVLQQQYNR-COOH              | EDSV <sub>424</sub> -S <sub>425</sub>   |
| Q62318        | TIF1-beta                    | QPGGTLDLTLIR            | AcD3-QPGGTLDLTLIR-COOH               | FSME <sub>731</sub> -Q <sub>732</sub>   |
| Q08784        | Treacle protein              | GGTLDLTLIR              | AcD3-GGTLDLTLIR-COOH                 | MEQP <sub>733</sub> -G <sub>734</sub>   |
| Q9JHJ0        | Tropomodulin-3               | SSPALAKGTQR             | AcD3-SSPALAKGTQR-COOH                | SASL <sub>591</sub> -S <sub>592</sub>   |
| Q8R5H6        | WAVE-1                       | DVLGSSNGVNQER           | AcD3-DVLGSSN<Dam>GVNQR-COOH          | TPFC <sub>150</sub> -D <sub>151</sub>   |
|               |                              | ALPFSQMSSELLTR          | AcD3-ALPFSQM<Mox>SELLTR-COOH         | YLSL <sub>253</sub> -A <sub>254</sub>   |

| Accession Nr. | Protein name                 | Spectra # | Start | End  | m/z     | z | error [Da] | Threshold | Score of highest scoring spectra | $\Delta$ Threshold | e-value     |
|---------------|------------------------------|-----------|-------|------|---------|---|------------|-----------|----------------------------------|--------------------|-------------|
| O08756        | HADH2                        | 1         | 238   | 251  | 830.92  | 2 | -0.0656    | 47        | 57                               | 10                 | 0.005012942 |
| O91WR3        | ASCC2                        | 1         | 617   | 632  | 875.898 | 2 | 0.0082     | 42        | 102                              | 60                 | 5.07816E-08 |
| O9JKX6        | Nuclt5                       | 1         | 93    | 110  | 961.461 | 2 | -0.0222    | 43        | 50                               | 7                  | 0.009994381 |
| P17427        | Ap2a2                        | 1         | 694   | 707  | 744.929 | 2 | 0.0987     | 42        | 65                               | 23                 | 0.000252088 |
| O7TQH0        | Atxn2l                       | 1         | 739   | 748  | 605.437 | 2 | 0.2174     | 41        | 48                               | 7                  | 0.009994381 |
| P01887        | Beta-2-microglobulin         | 3         | 23    | 32   | 655.371 | 2 | -0.0034    | 42        | 62                               | 20                 | 0.000502592 |
| O8BTV2        | Cpsf7                        | 1         | 202   | 214  | 687.405 | 2 | 0.0929     | 42        | 62                               | 20                 | 0.000502592 |
| P97310        | MCM2                         | 1         | 94    | 110  | 953.444 | 2 | -0.0308    | 42        | 50                               | 8                  | 0.007940871 |
| P60898        | RNA polymerase II subunit B9 | 1         | 7     | 15   | 541.831 | 2 | 0.0839     | 45        | 50                               | 5                  | 0.015831838 |
| O9WUK2        | eIF-4H                       | 1         | 95    | 108  | 806.484 | 2 | 0.1112     | 42        | 97                               | 55                 | 1.60378E-07 |
| P97323        | Fbpase 3                     | 1         | 40    | 46   | 484.85  | 2 | 0.1978     | 33        | 36                               | 3                  | 0.025078803 |
| P49710        | LckBP1                       | 1         | 119   | 128  | 580.317 | 2 | 0.0255     | 41        | 71                               | 30                 | 5.03893E-05 |
| P51859        | HDFG                         | 1         | 209   | 232  | 877.714 | 3 | -0.0535    | 43        | 51                               | 8                  | 0.007940871 |
| O02780        | NF1-A                        | 1         | 312   | 322  | 643.346 | 2 | 0.0961     | 41        | 52                               | 11                 | 0.003982951 |
| O9D903        | EBP2                         | 2         | 17    | 29   | 762.861 | 2 | -0.0221    | 42        | 65                               | 23                 | 0.000252088 |
| O8K3X4        | Protein C14orf4 homolog      | 1         | 116   | 129  | 750.431 | 2 | -0.0151    | 42        | 75                               | 33                 | 2.52741E-05 |
| P26350        | Prothymosin alpha            | 1         | 68    | 89   | 818.719 | 3 | 0.1608     | 35        | 41                               | 6                  | 0.012578928 |
| O9QZS2        | RING finger protein 4        | 1         | 96    | 106  | 640.898 | 2 | 0.1843     | 42        | 51                               | 9                  | 0.006309289 |
| O60710        | MG11                         | 1         | 445   | 458  | 795.417 | 2 | 0.0058     | 42        | 76                               | 34                 | 2.00811E-05 |
| O8BT18        | Srrm2                        | 1         | 2324  | 2337 | 723.95  | 2 | 0.1479     | 30        | 45                               | 15                 | 0.001587282 |
| P27048        | snRNP-B                      | 1         | 74    | 94   | 758.728 | 3 | 0.0143     | 46        | 62                               | 16                 | 0.001261149 |
| P26369        | U2AF2                        | 4         | 133   | 146  | 765.91  | 2 | 0.0103     | 42        | 68                               | 26                 | 0.000126441 |
| O54988        | STE20-related kinase         | 1         | 668   | 679  | 653.168 | 2 | -0.3073    | 45        | 52                               | 7                  | 0.009994381 |
| O35988        | Syndecan-4                   | 1         | 30    | 41   | 714.856 | 2 | -0.0361    | 42        | 62                               | 20                 | 0.000502592 |
| P26039        | Talin-1                      | 1         | 425   | 438  | 906.519 | 2 | 0.0347     | 42        | 53                               | 11                 | 0.003982951 |
| O62318        | TIF1-beta                    | 1         | 732   | 743  | 664.949 | 2 | 0.1296     | 42        | 42                               | 0                  | 0.05        |
| O08784        | Treacle protein              | 1         | 592   | 602  | 603.424 | 2 | 0.1652     | 42        | 44                               | 2                  | 0.031564182 |
| O9JHJ0        | Tropomodulin-3               | 2         | 151   | 163  | 710.876 | 2 | 0.0706     | 42        | 74                               | 32                 | 3.18099E-05 |
| O8R5H6        | WAVE-1                       | 1         | 254   | 266  | 777.416 | 2 | 0.0176     | 47        | 58                               | 11                 | 0.003982951 |

## **MS/MS-spectra of proteins in Table 1**

AcD3-SGPINDIDANPR-COOH

precursor mass: 657.3940 Da (charge: +2) protein: P97864 (199-210)

score (threshold): 39.0 (31.0)

instrument: Agilent Esquire HCT

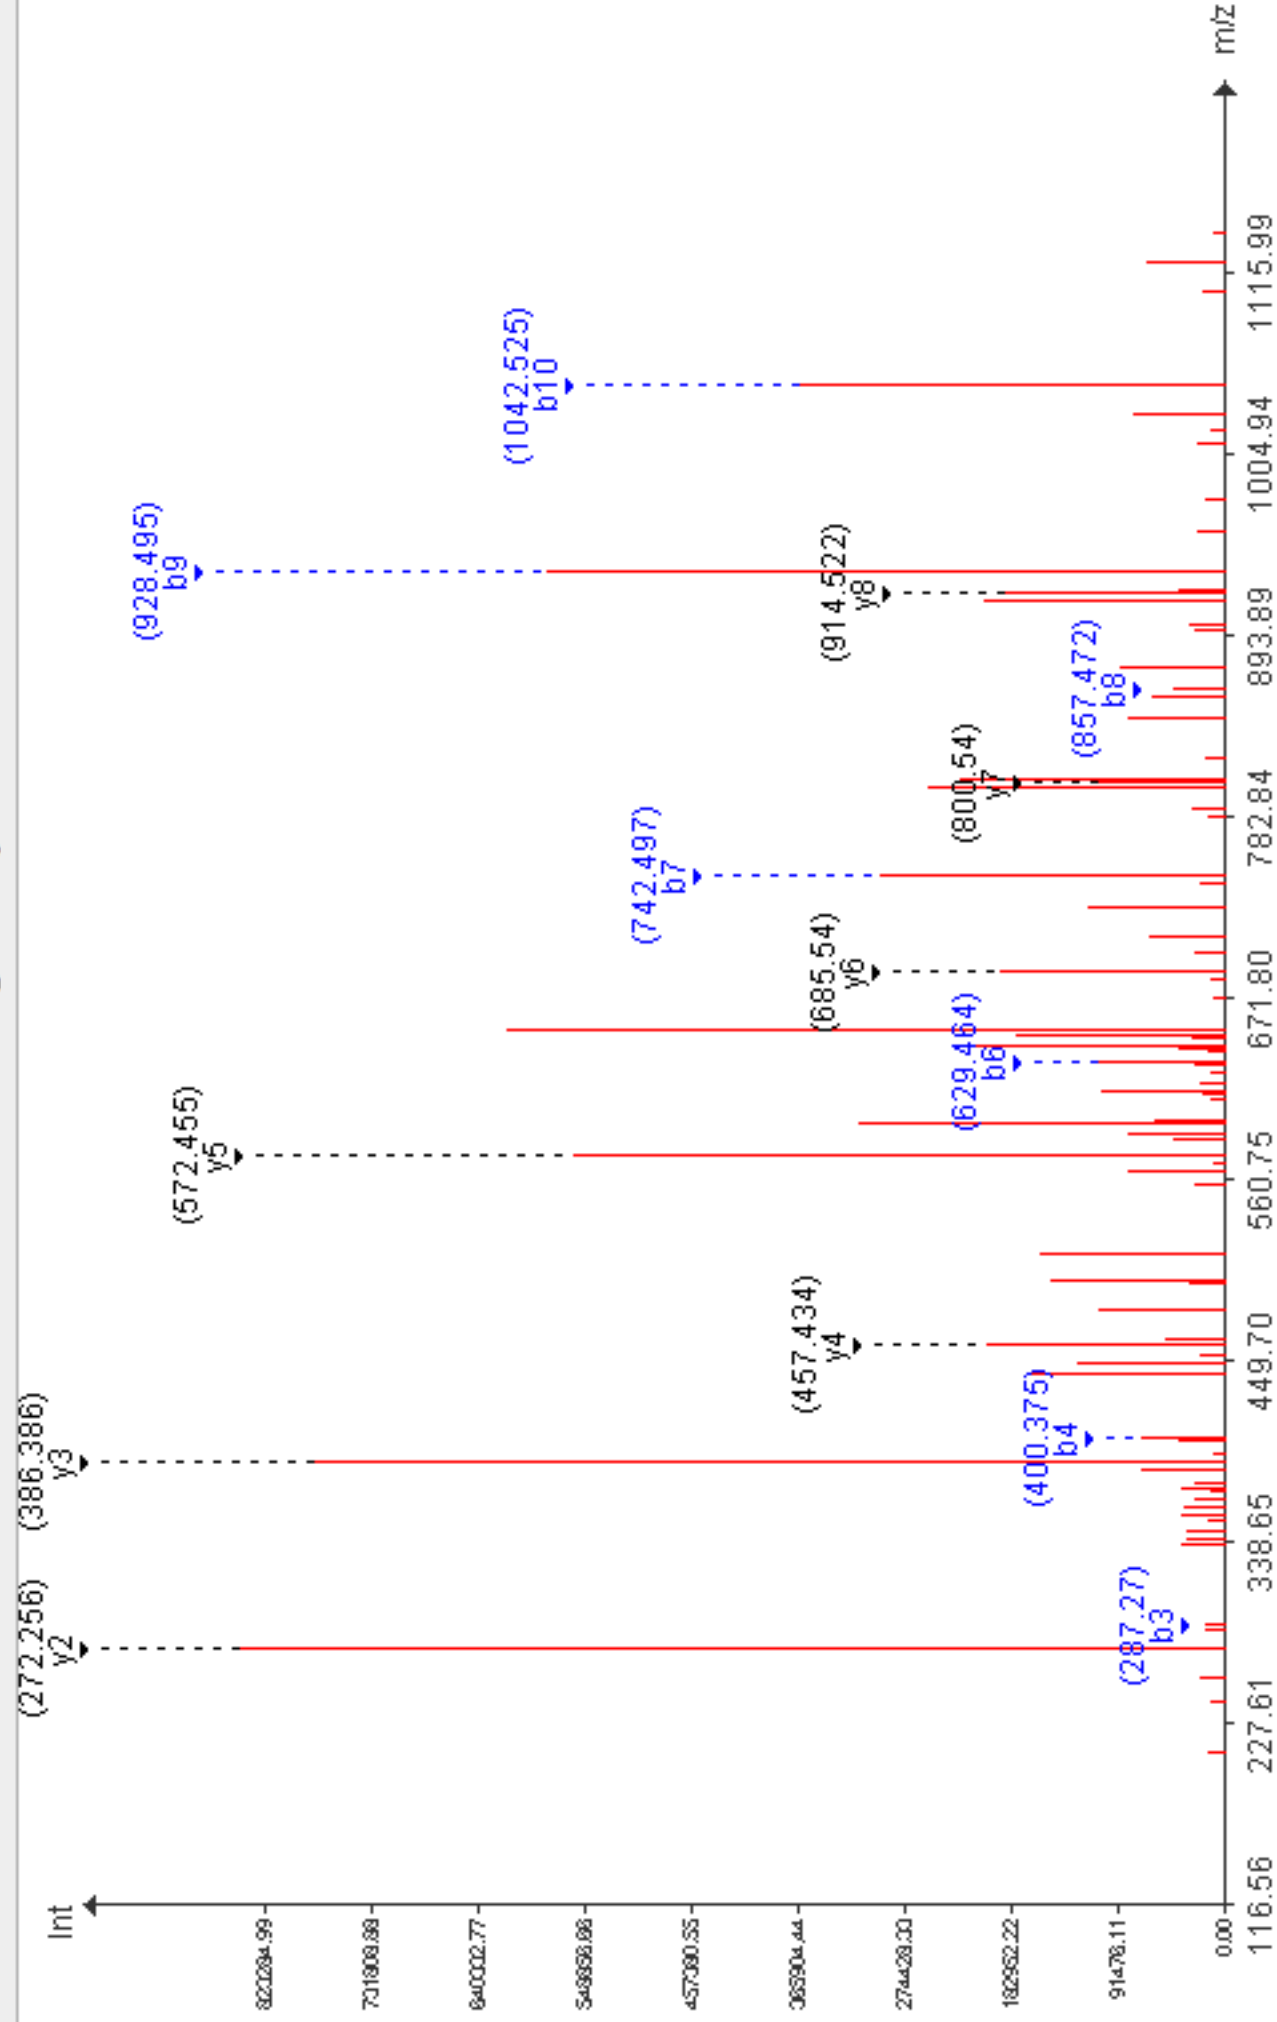

**AcD3-N(Dam)GSGM(Mox)C(Cmm\*)K(AcD3K\*)AGFAGDDAPR-COOH**

precursor mass: 909.3720 Da (charge: +2) protein: P60710 (12-28)

score (threshold): 46.0 (42.0)

instrument: Agilent Esquire HCT

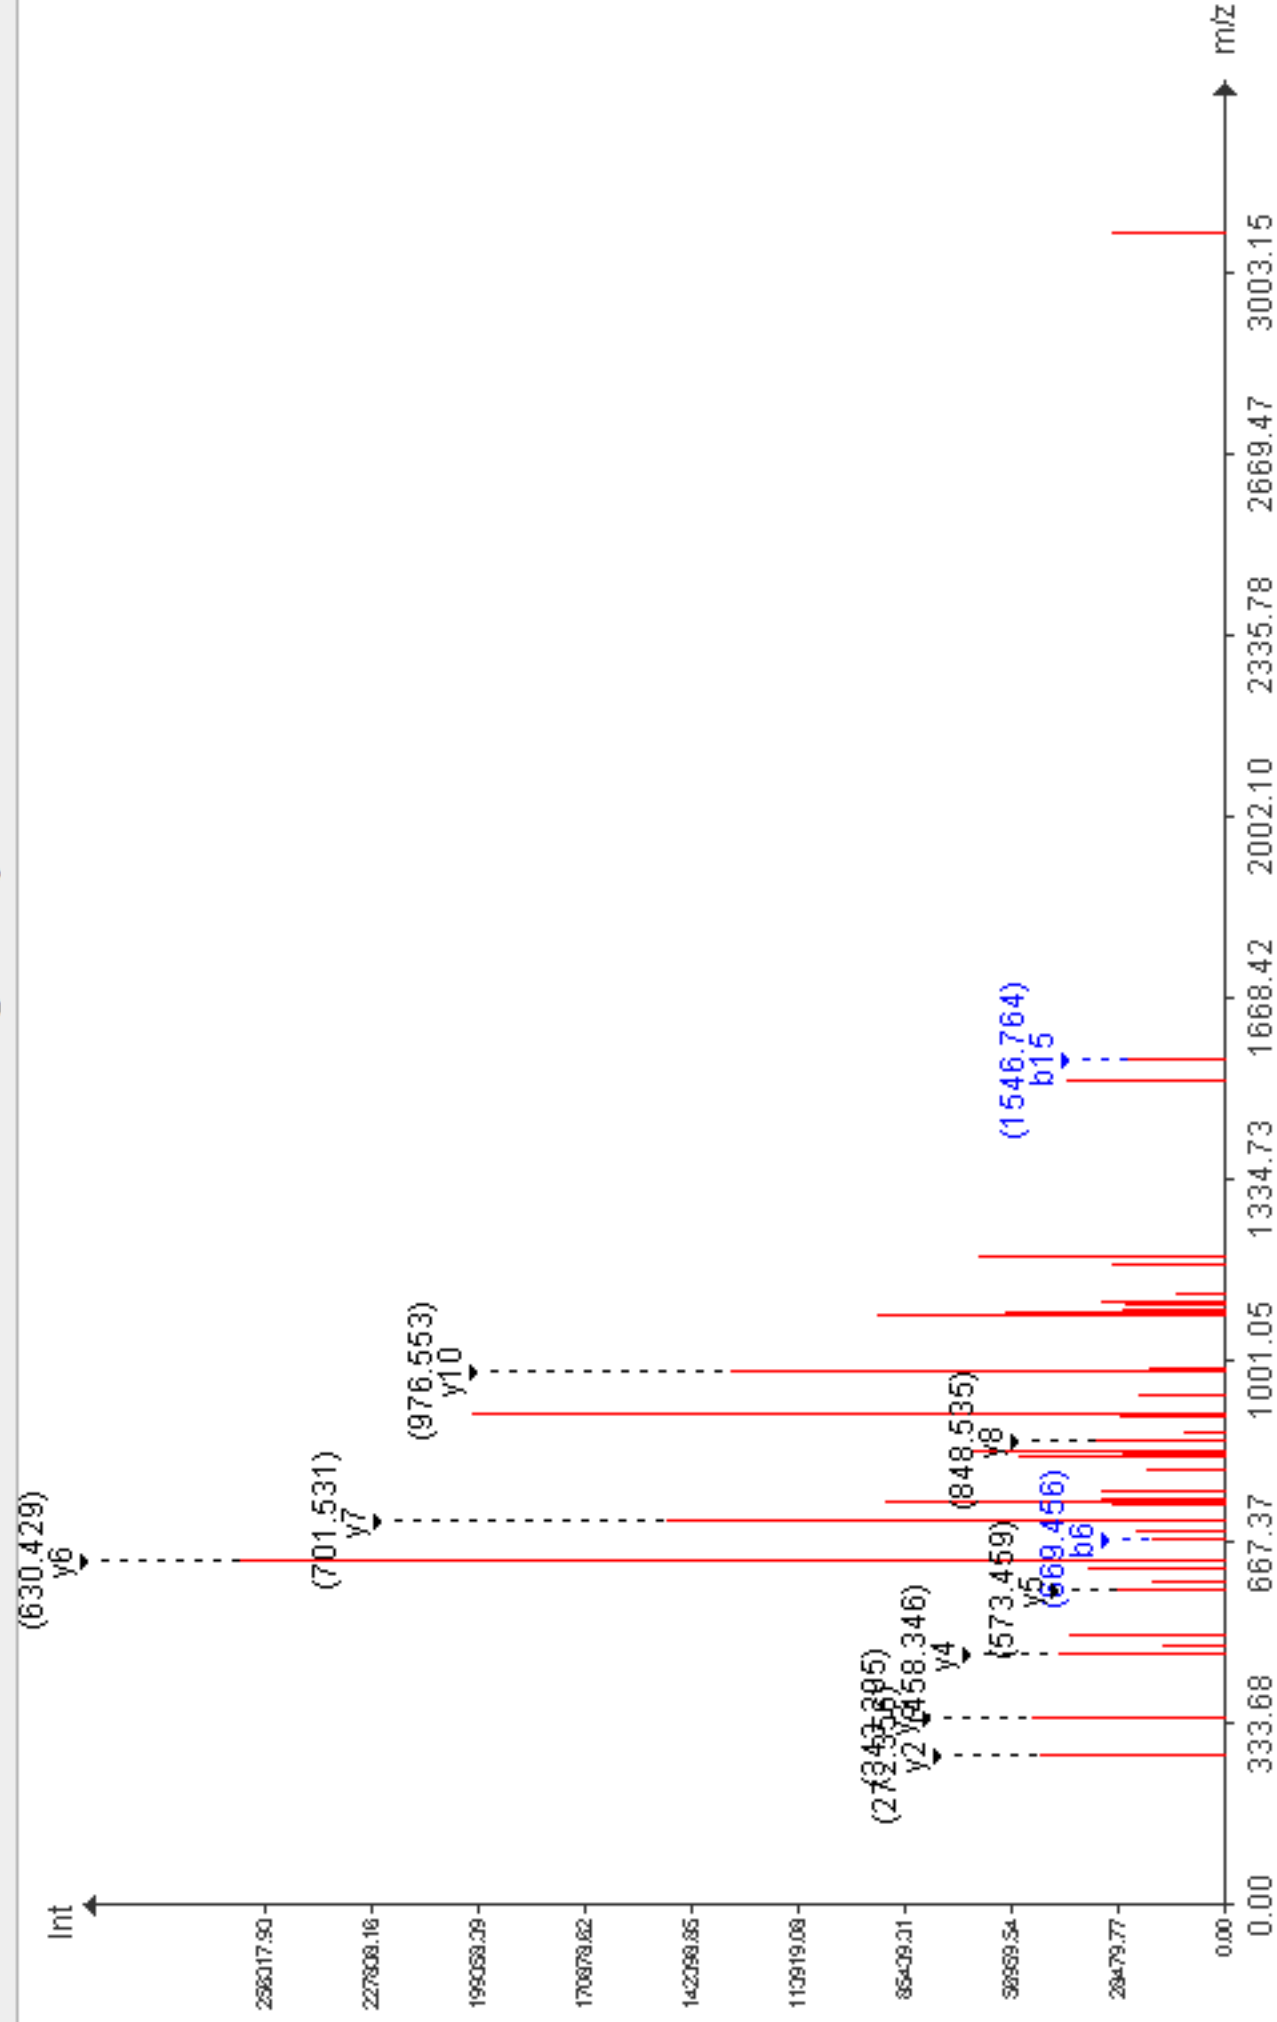

**AcD3-AVAVTM(Mox)GPK(AcD3K\*)GR-COOH**

precursor mass: 596.8780 Da (charge: +2) protein: P63038 (50-60)

score (threshold): 66.0 (42.0)

instrument: Agilent Esquire HCT

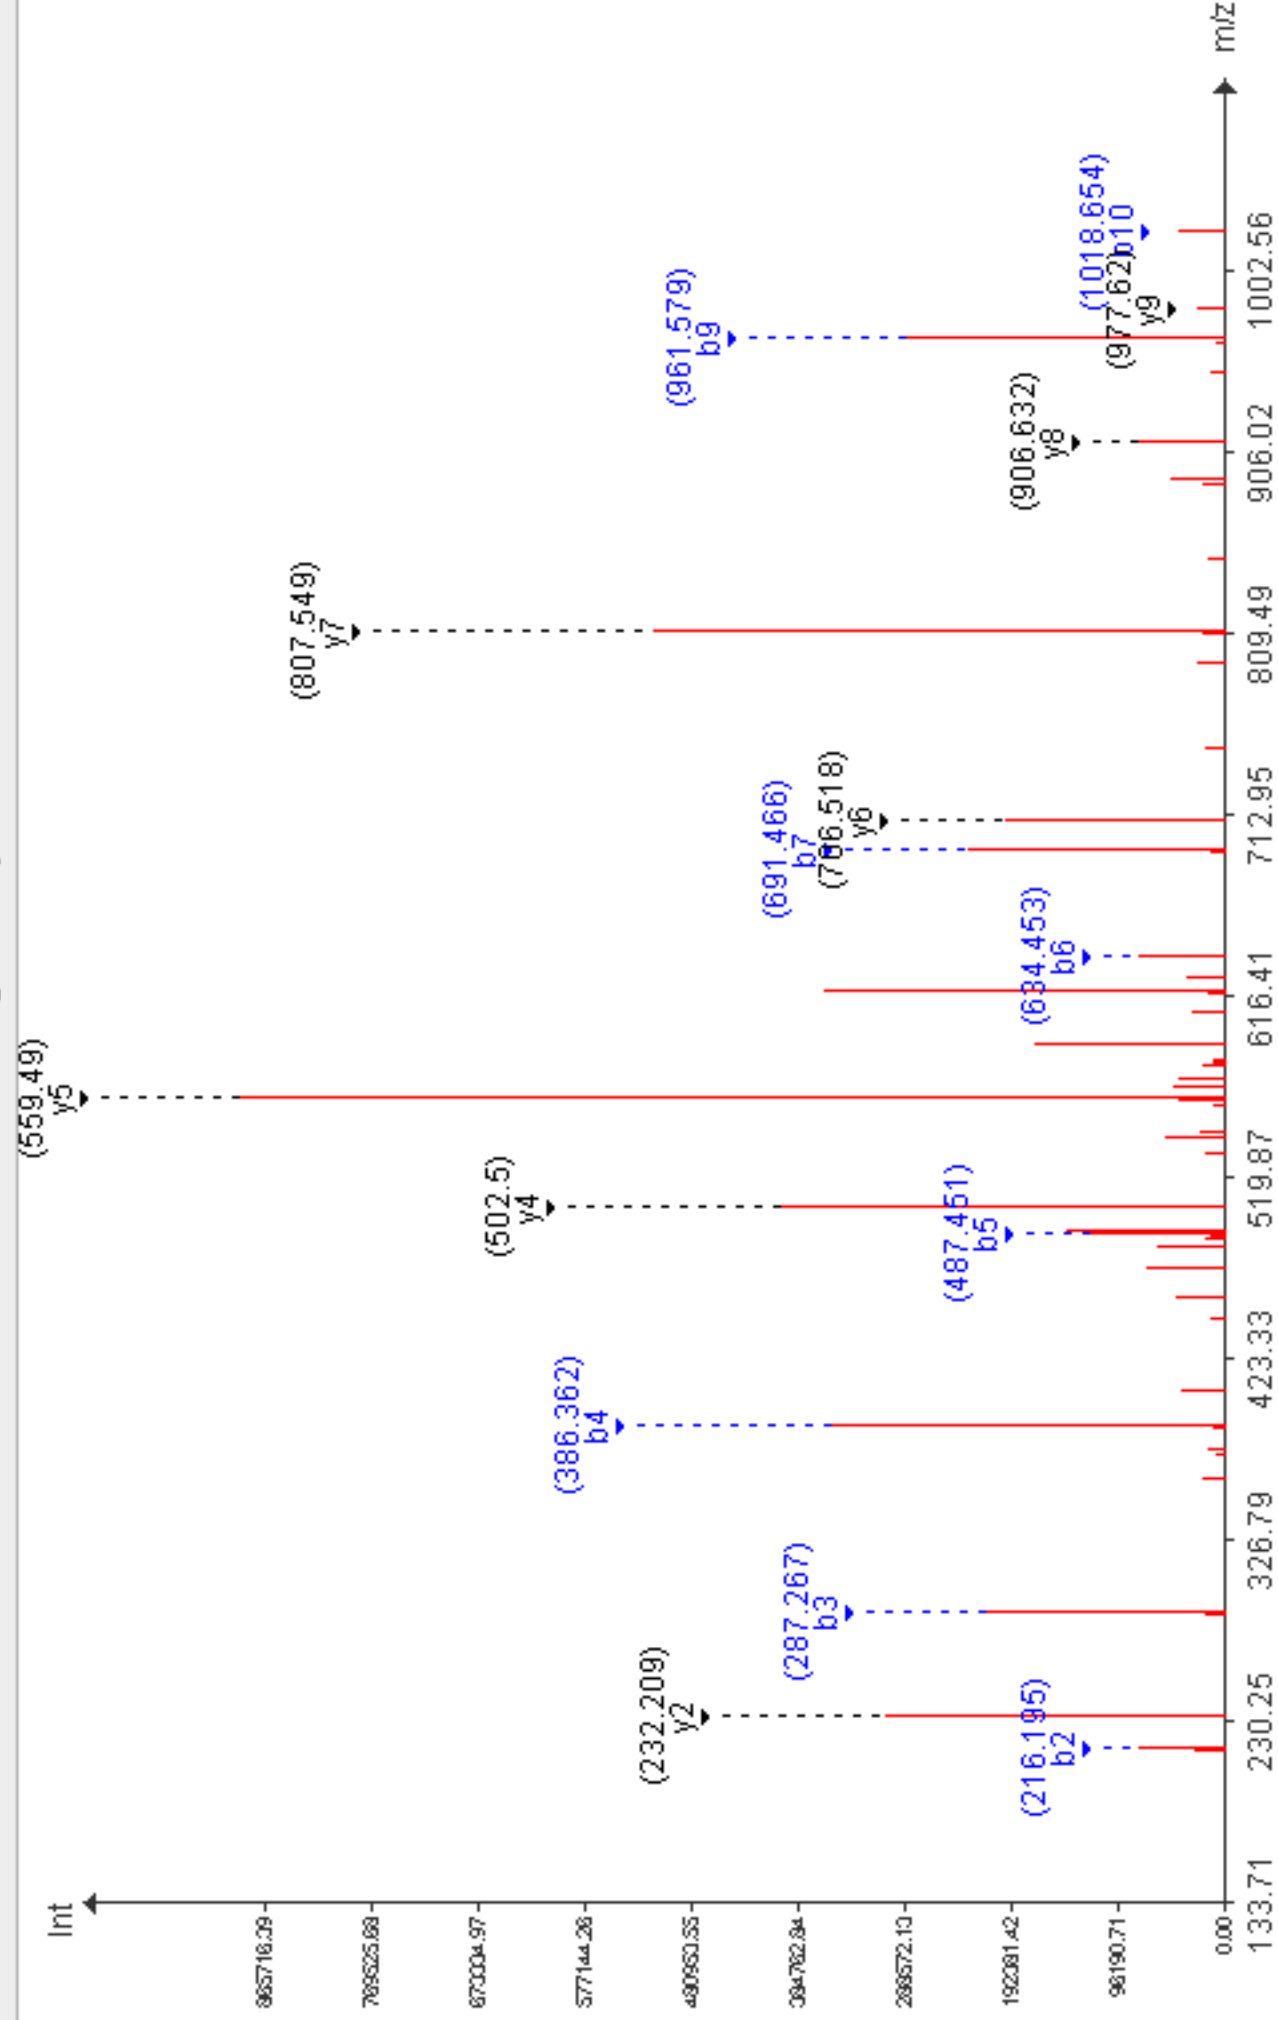



**AcD3-VANNTNEEAGDGTITATVLAR-COOH**

precursor mass: 1075.4600 Da (charge: +2) protein: P63038 (101-121)

score (threshold): 60.0 (43.0)

instrument: Agilent Esquire HCT

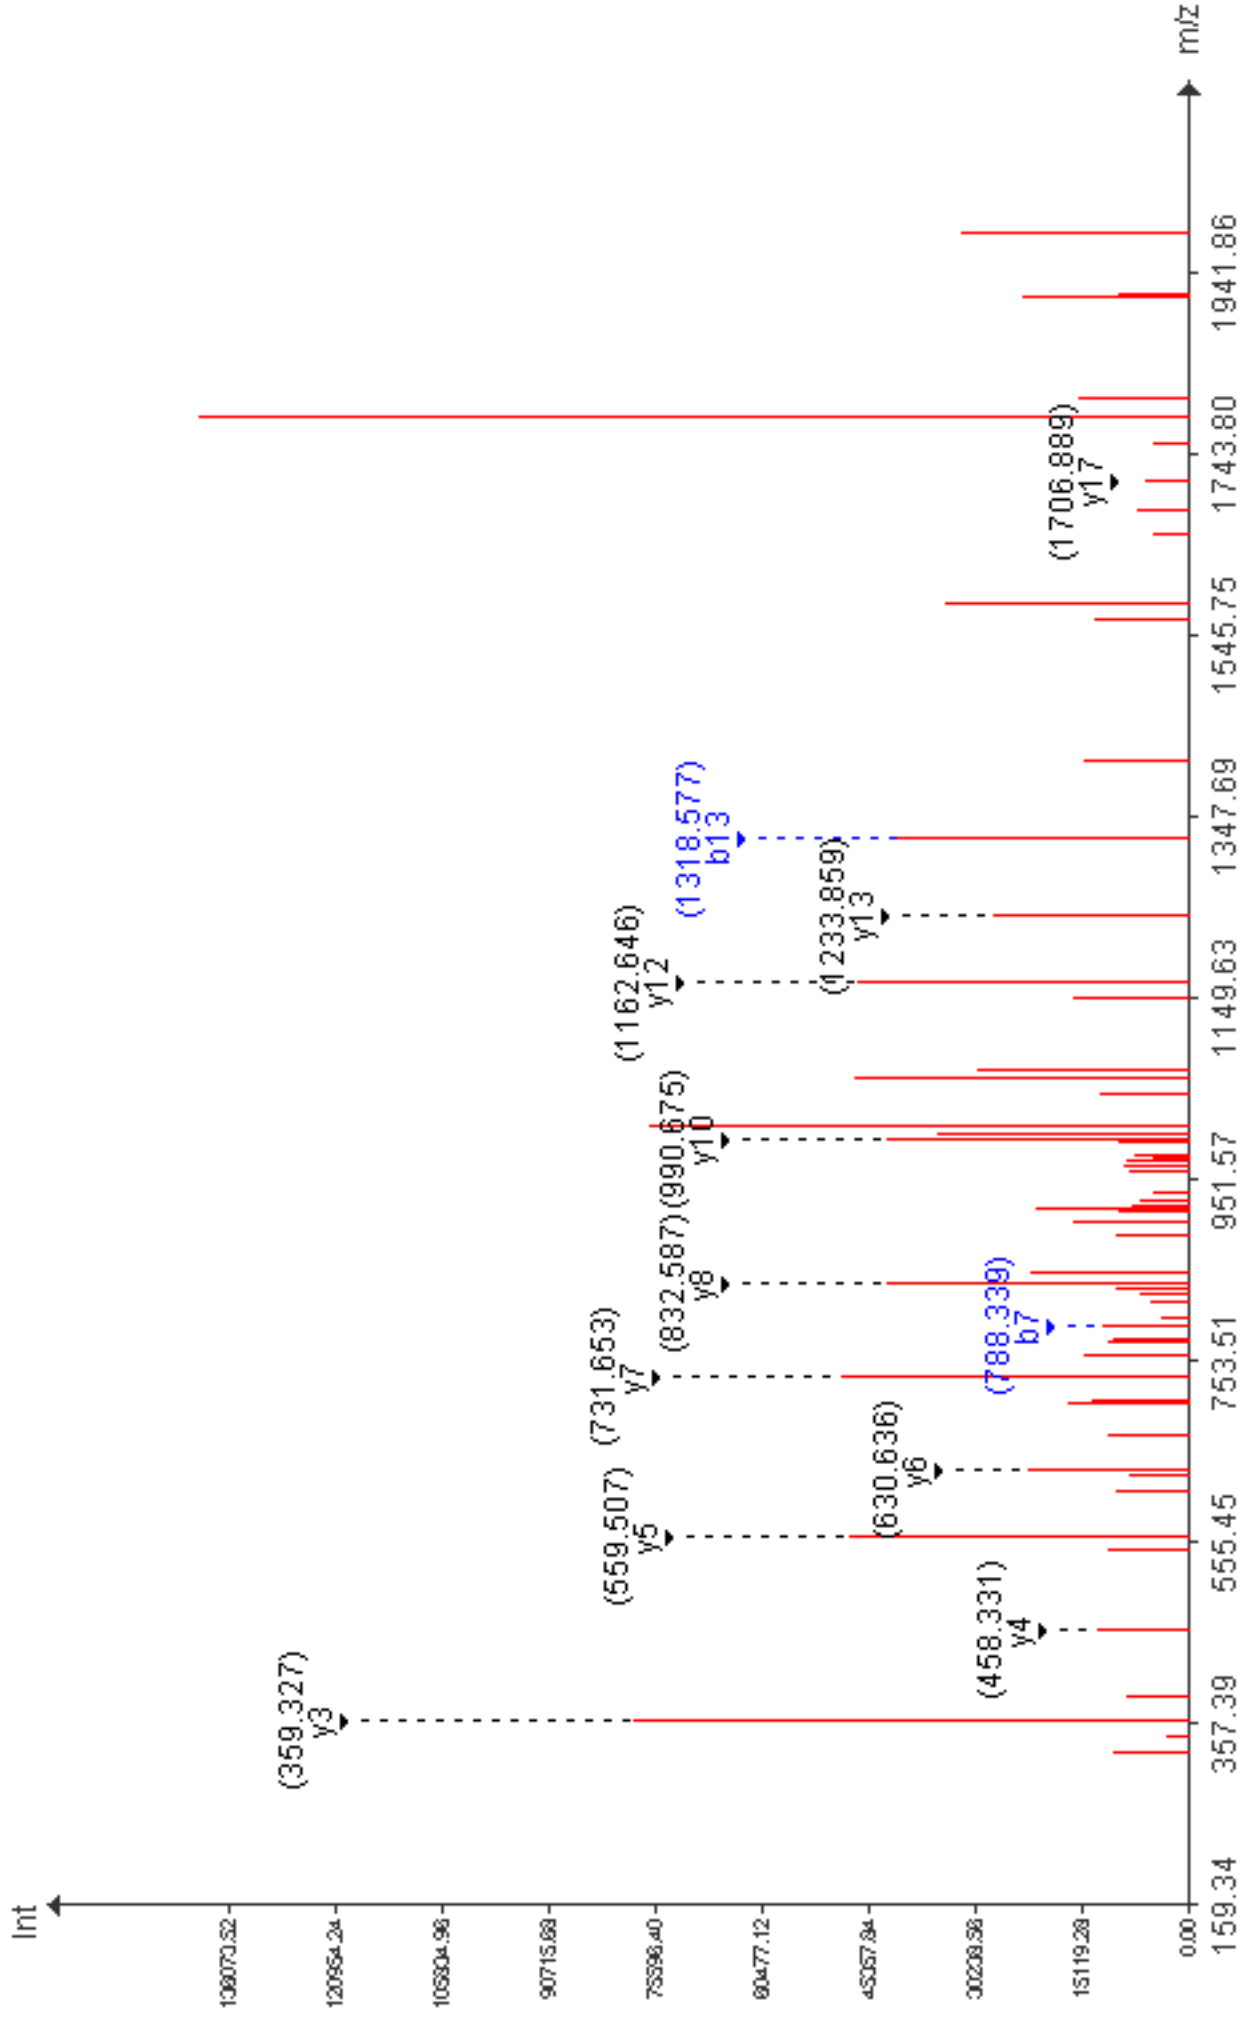

AcD3-LVADISEAEQR-COOH

precursor mass: 638.4350 Da (charge: +2) protein: Q8R5A3 (71-81)

score (threshold): 56.0 (42.0)

instrument: Agilent Esquire HCT

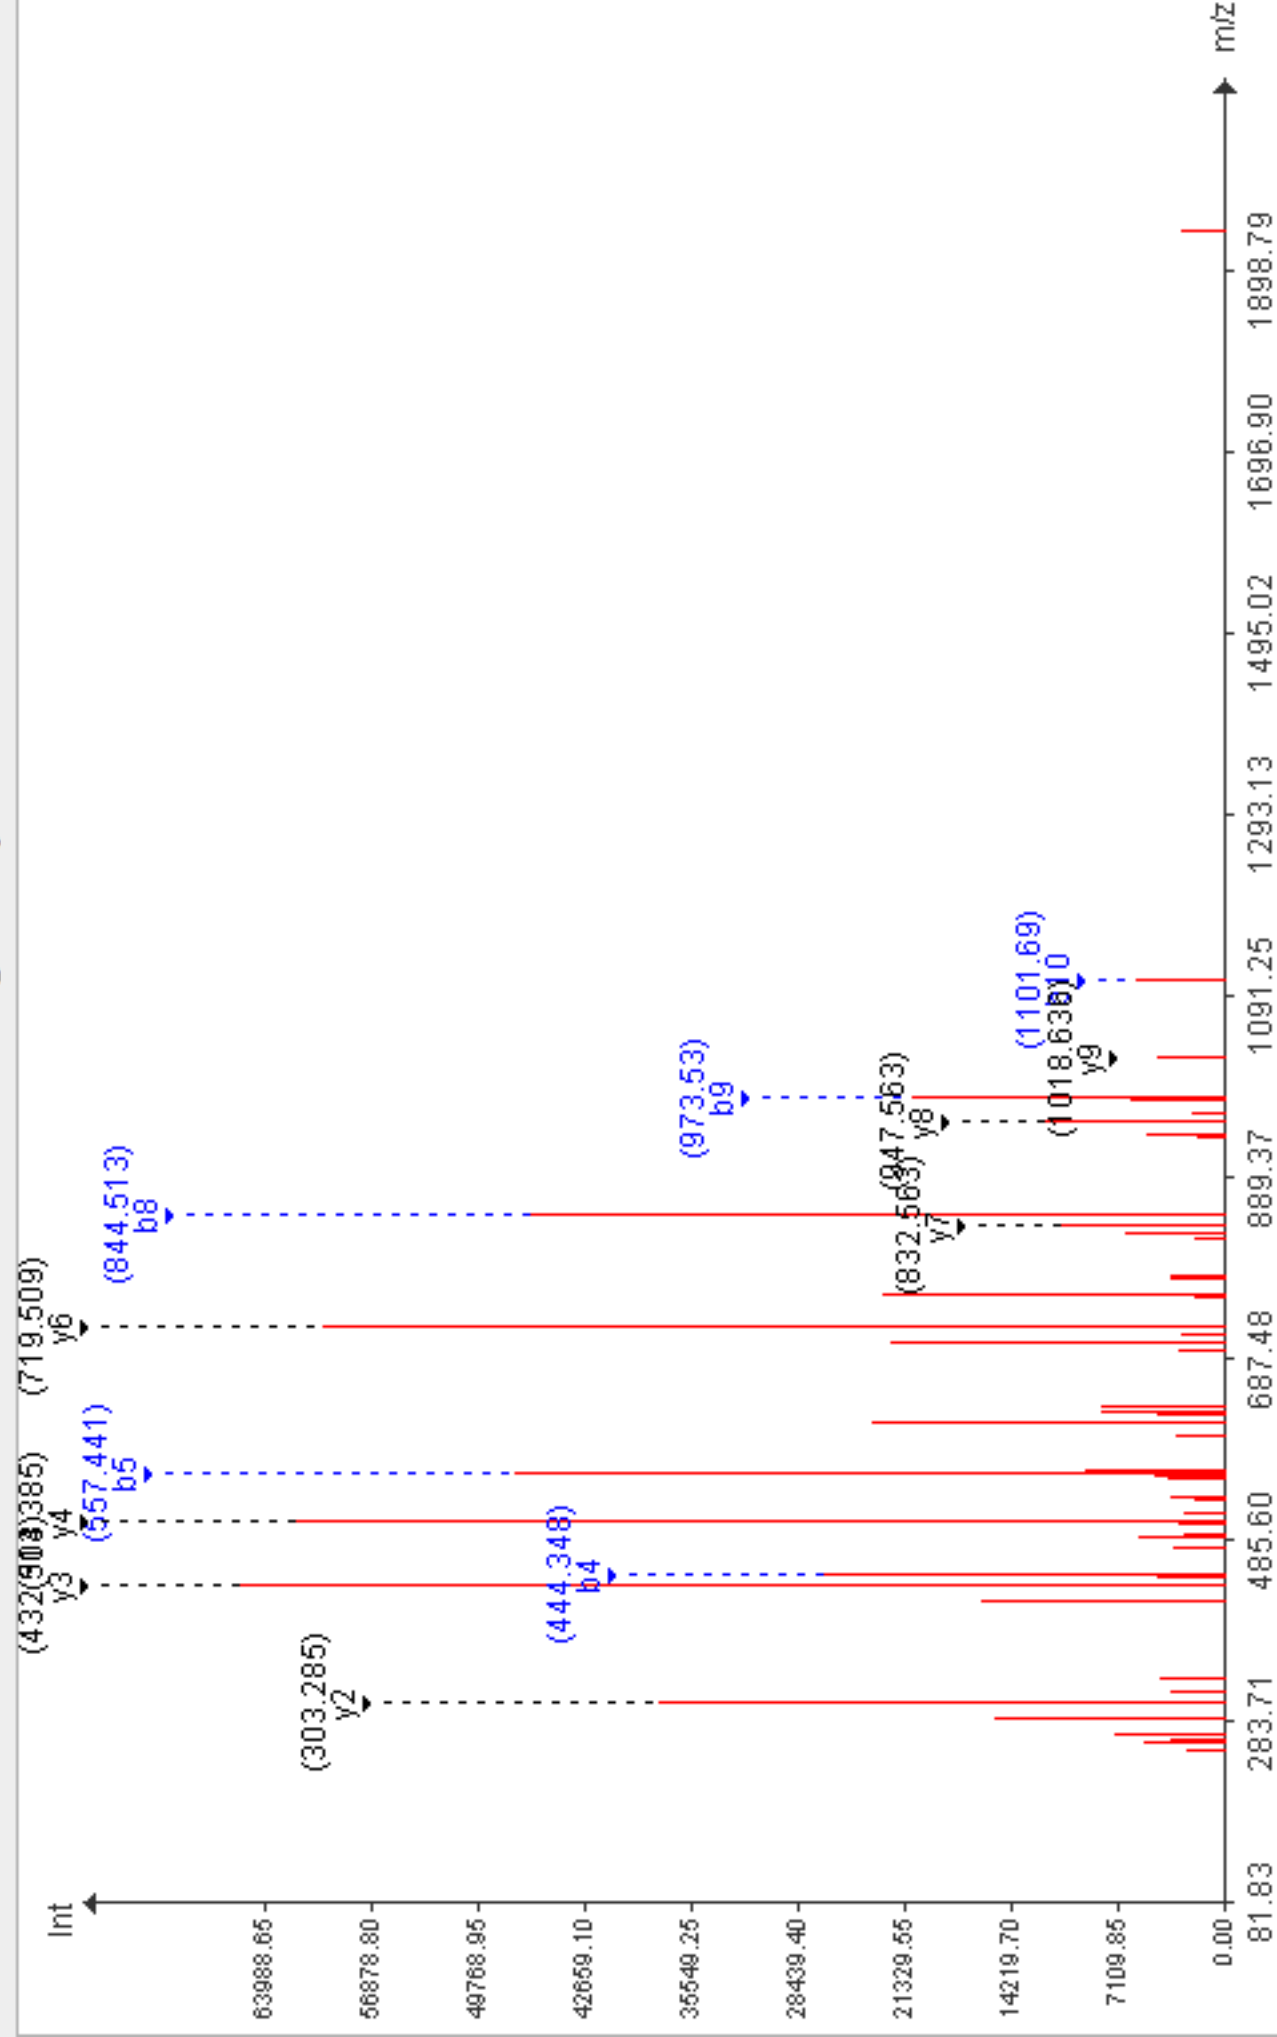

**AcD3-GDGSEVSDEEEASFPSEER-COOH**

precursor mass: 1050.9230 Da (charge: +2) protein: Q99KY4 (821-839)

score (threshold): 98.0 (43.0)

instrument: Agilent Esquire HCT

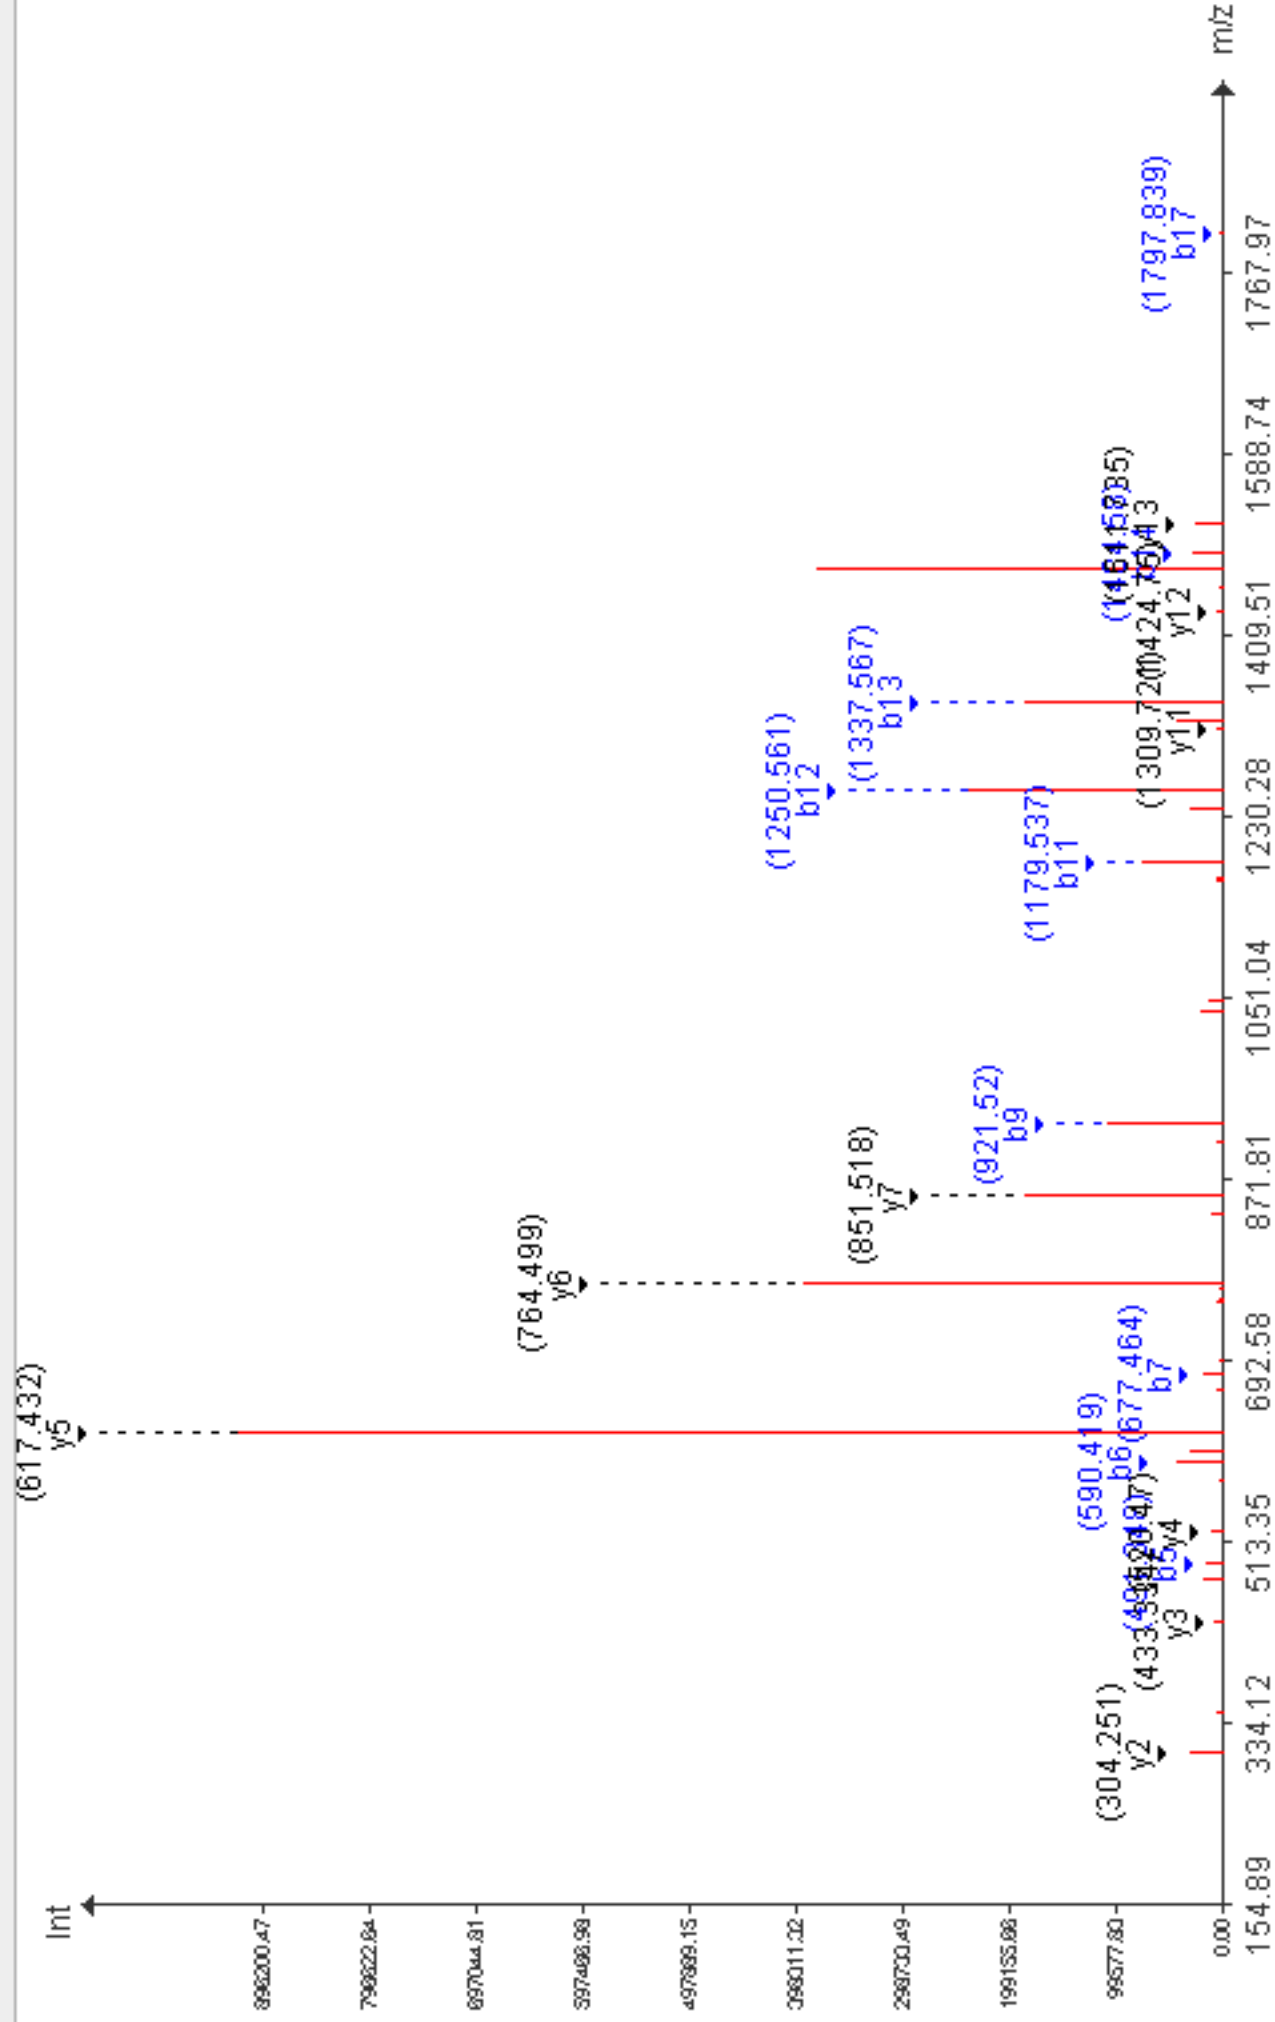

**ACD3-GADSTGVVAK(AcD3K\*)LSPANQR-COOH**

**precursor mass: 880.9750 Da (charge: +2) protein: Q62318 (685-701)**

**score (threshold): 62.0 (42.0)**

**instrument: Agilent Esquire HCT**

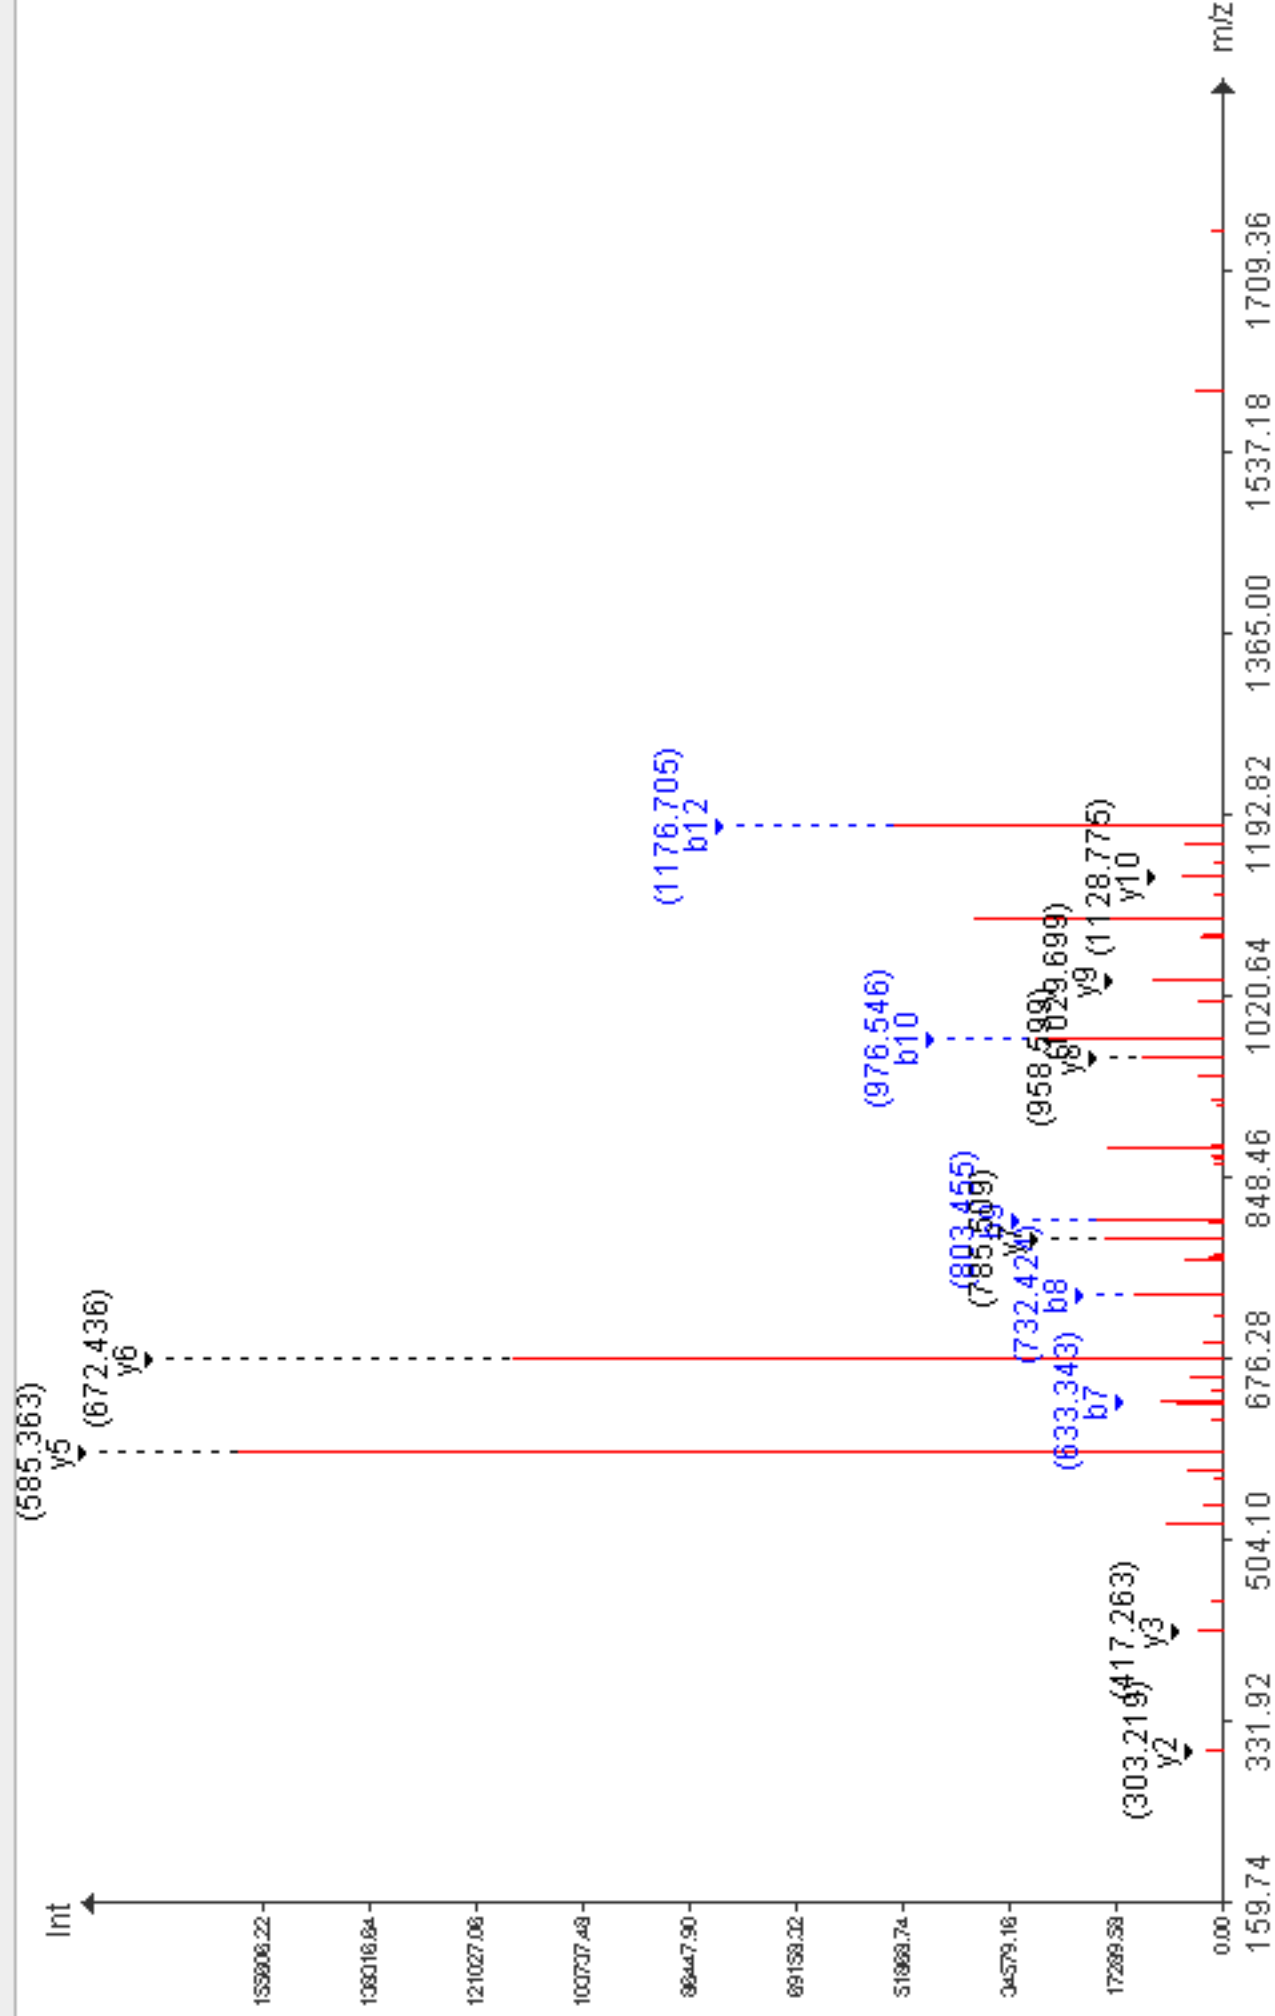

**AcD3-GSPGLK(AcD3K\*)SVLSTGR-COOH**

precursor mass: 674.9280 Da (charge: +2) protein: Q5R.JH6 (518-530)

score (threshold): 64.0 (42.0)

instrument: Agilent Esquire HCT

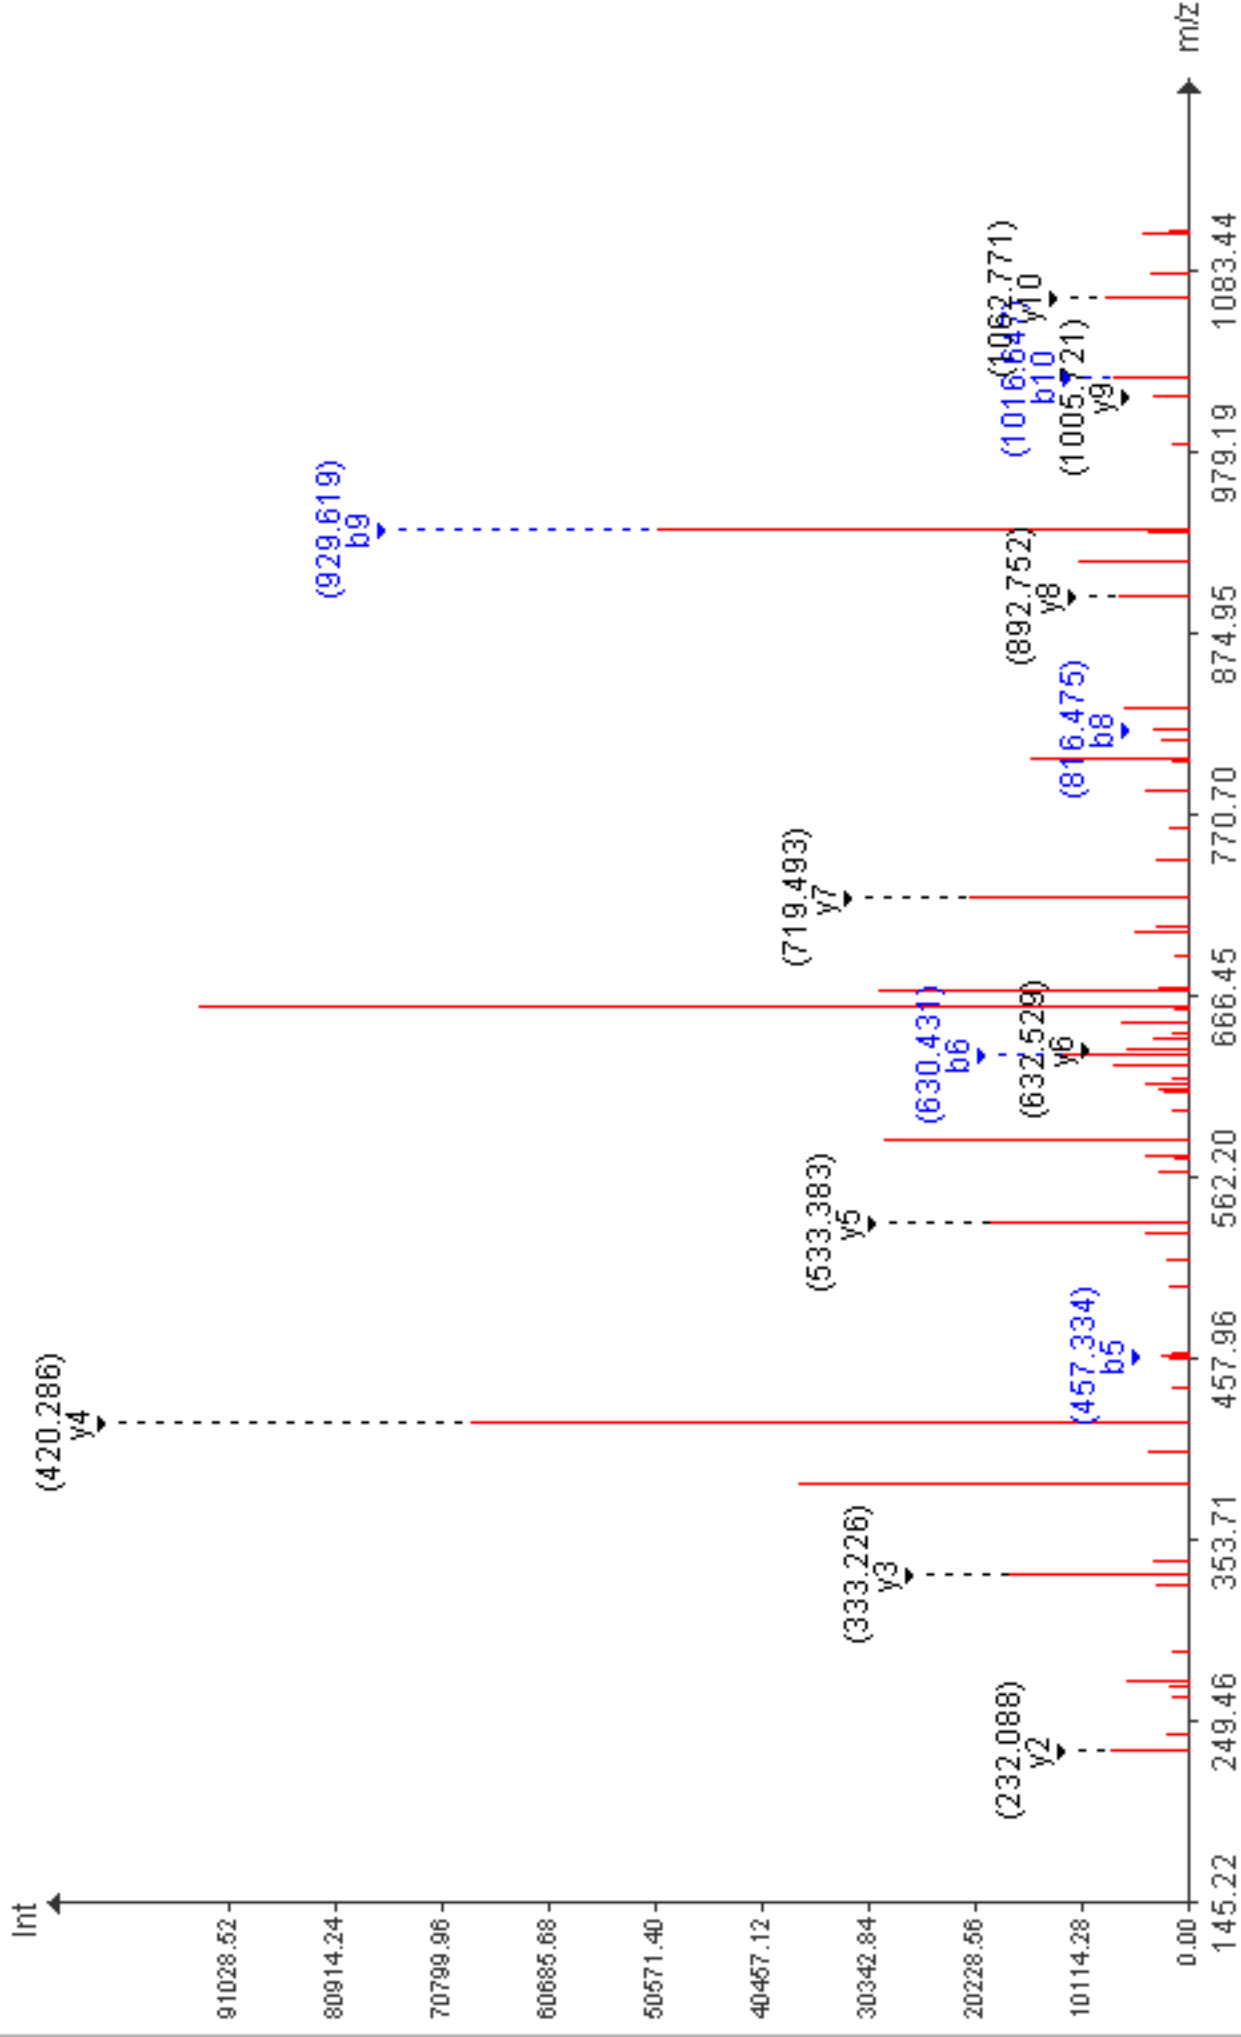

**ACD3-EAPSNLSQASTLQANR-COOH**

precursor mass: 866.4930 Da (charge: +2) protein: Q7TMY8 (2385-2400)

score (threshold): 63.0 (42.0)

instrument: Agilent Esquire HCT

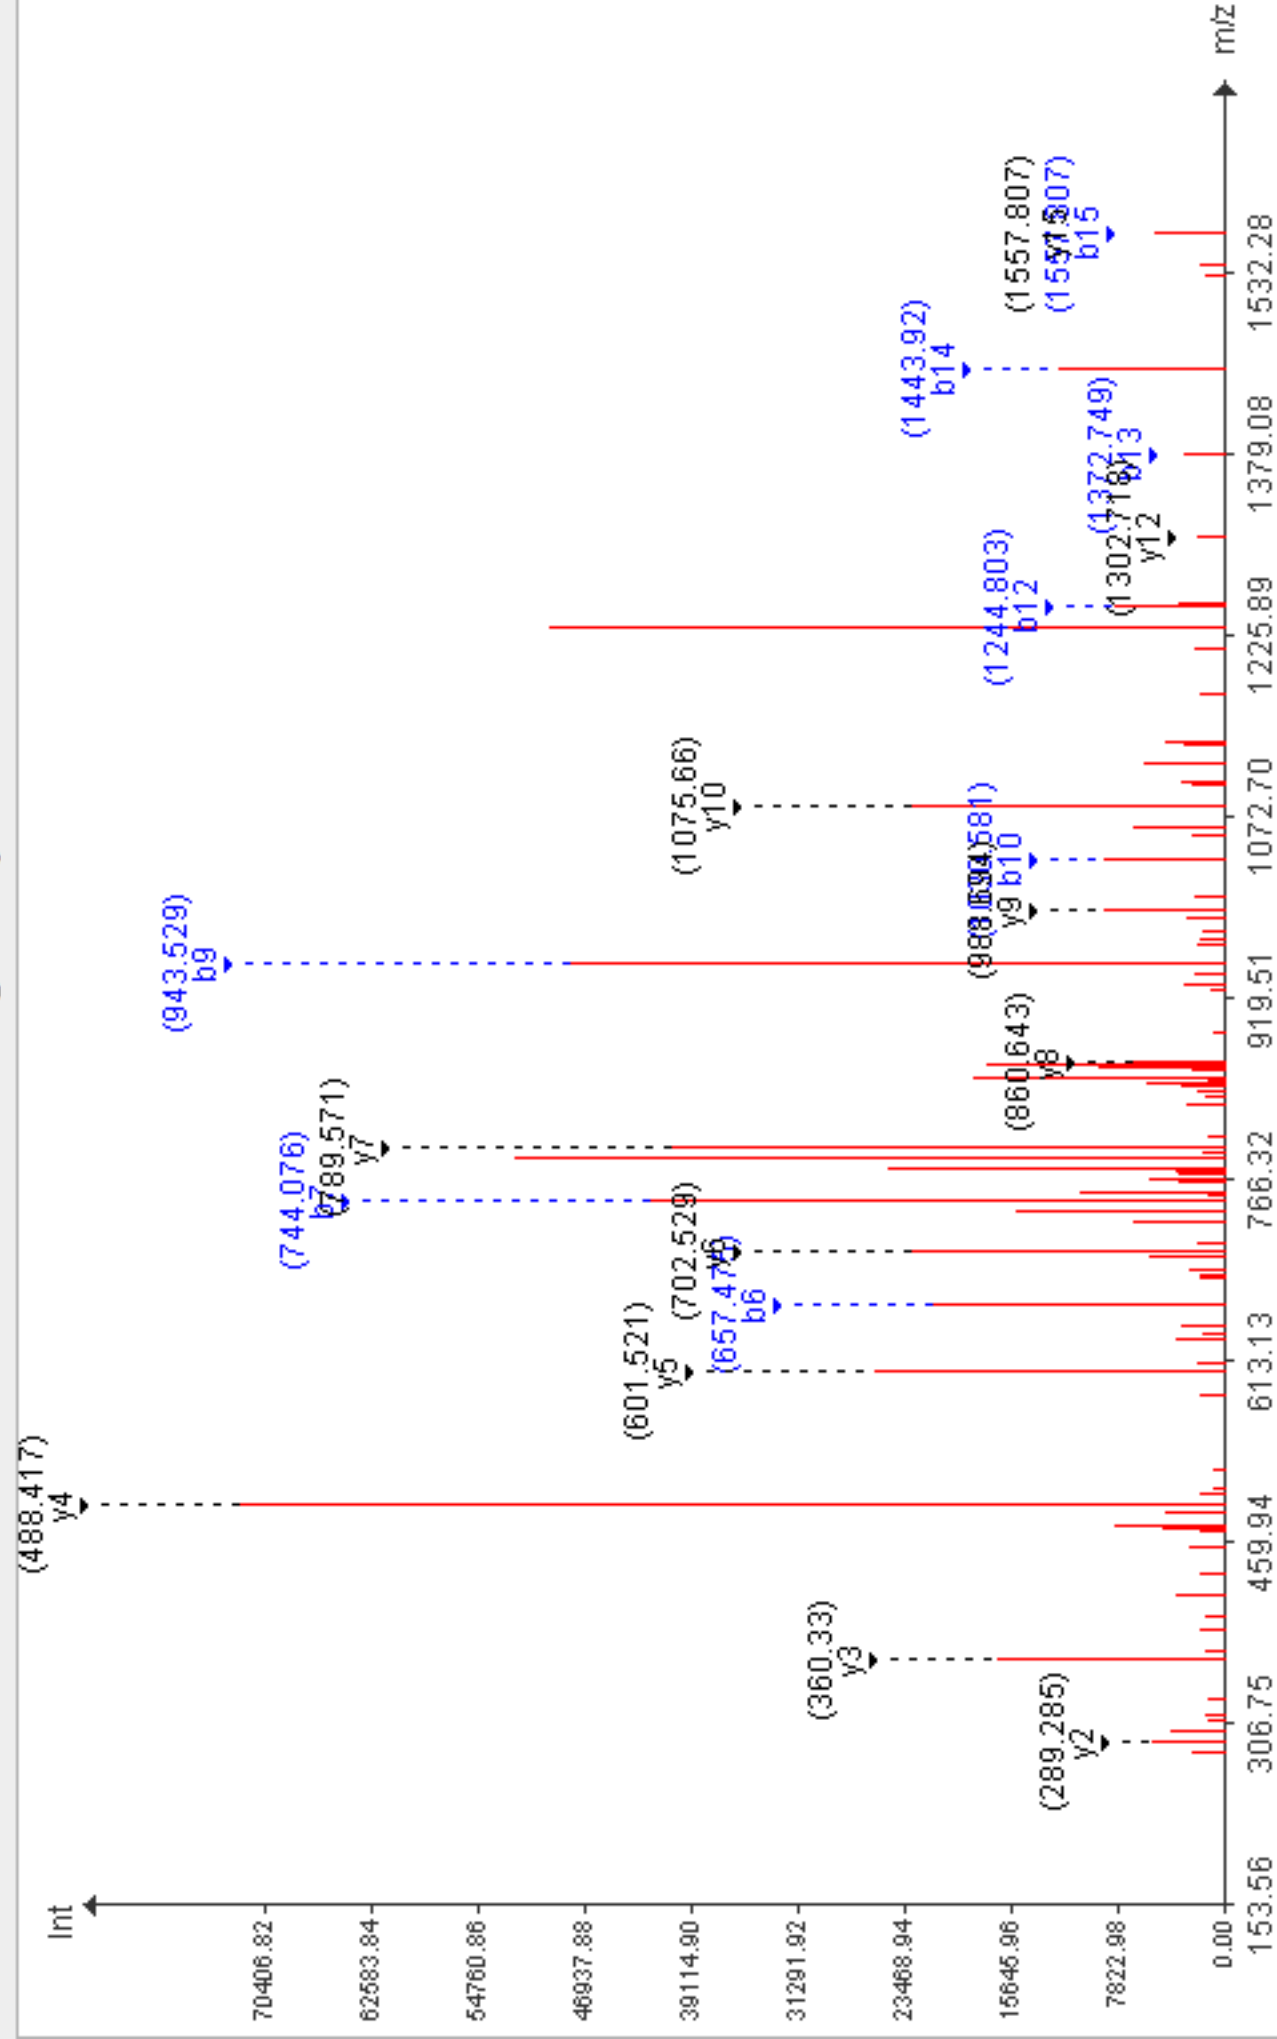

**AcD3-GTGNLEEEQ(Dam)ESEGETYEDIDSSK(AcD3K\*)ER-COOH**  
precursor mass: 974.7710 Da (charge: +3) protein: O35601 (435-459)  
score (threshold): 54.0 (43.0)  
instrument: Agilent Esquire HCT

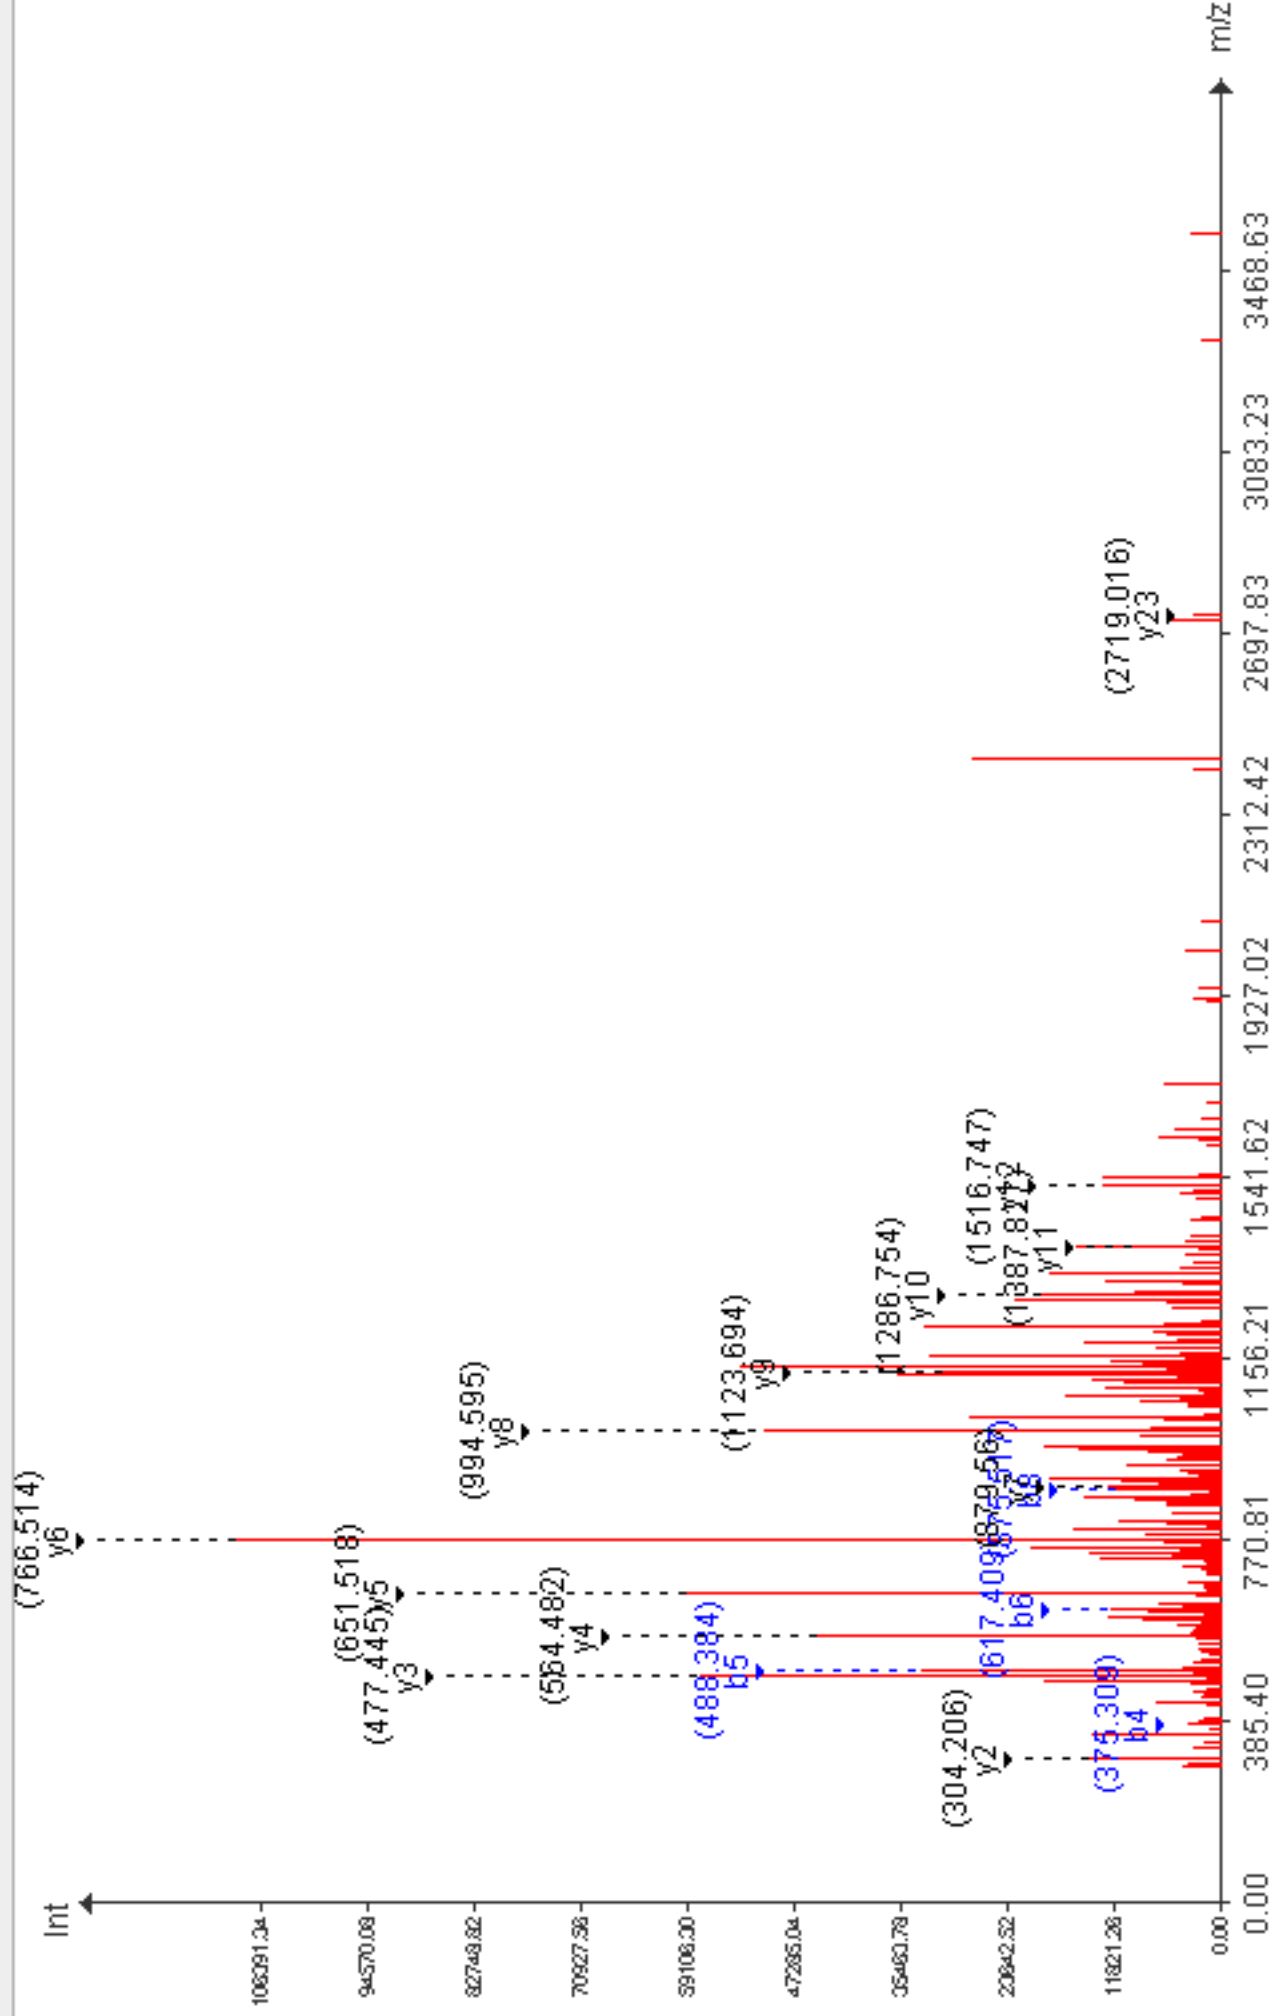

**AcD3-DPDPFTQDDQDTR-COOH**

precursor mass: 813.3640 Da (charge: +2) protein: P25206 (531-543)

score (threshold): 63.0 (42.0)

instrument: Agilent Esquire HCT

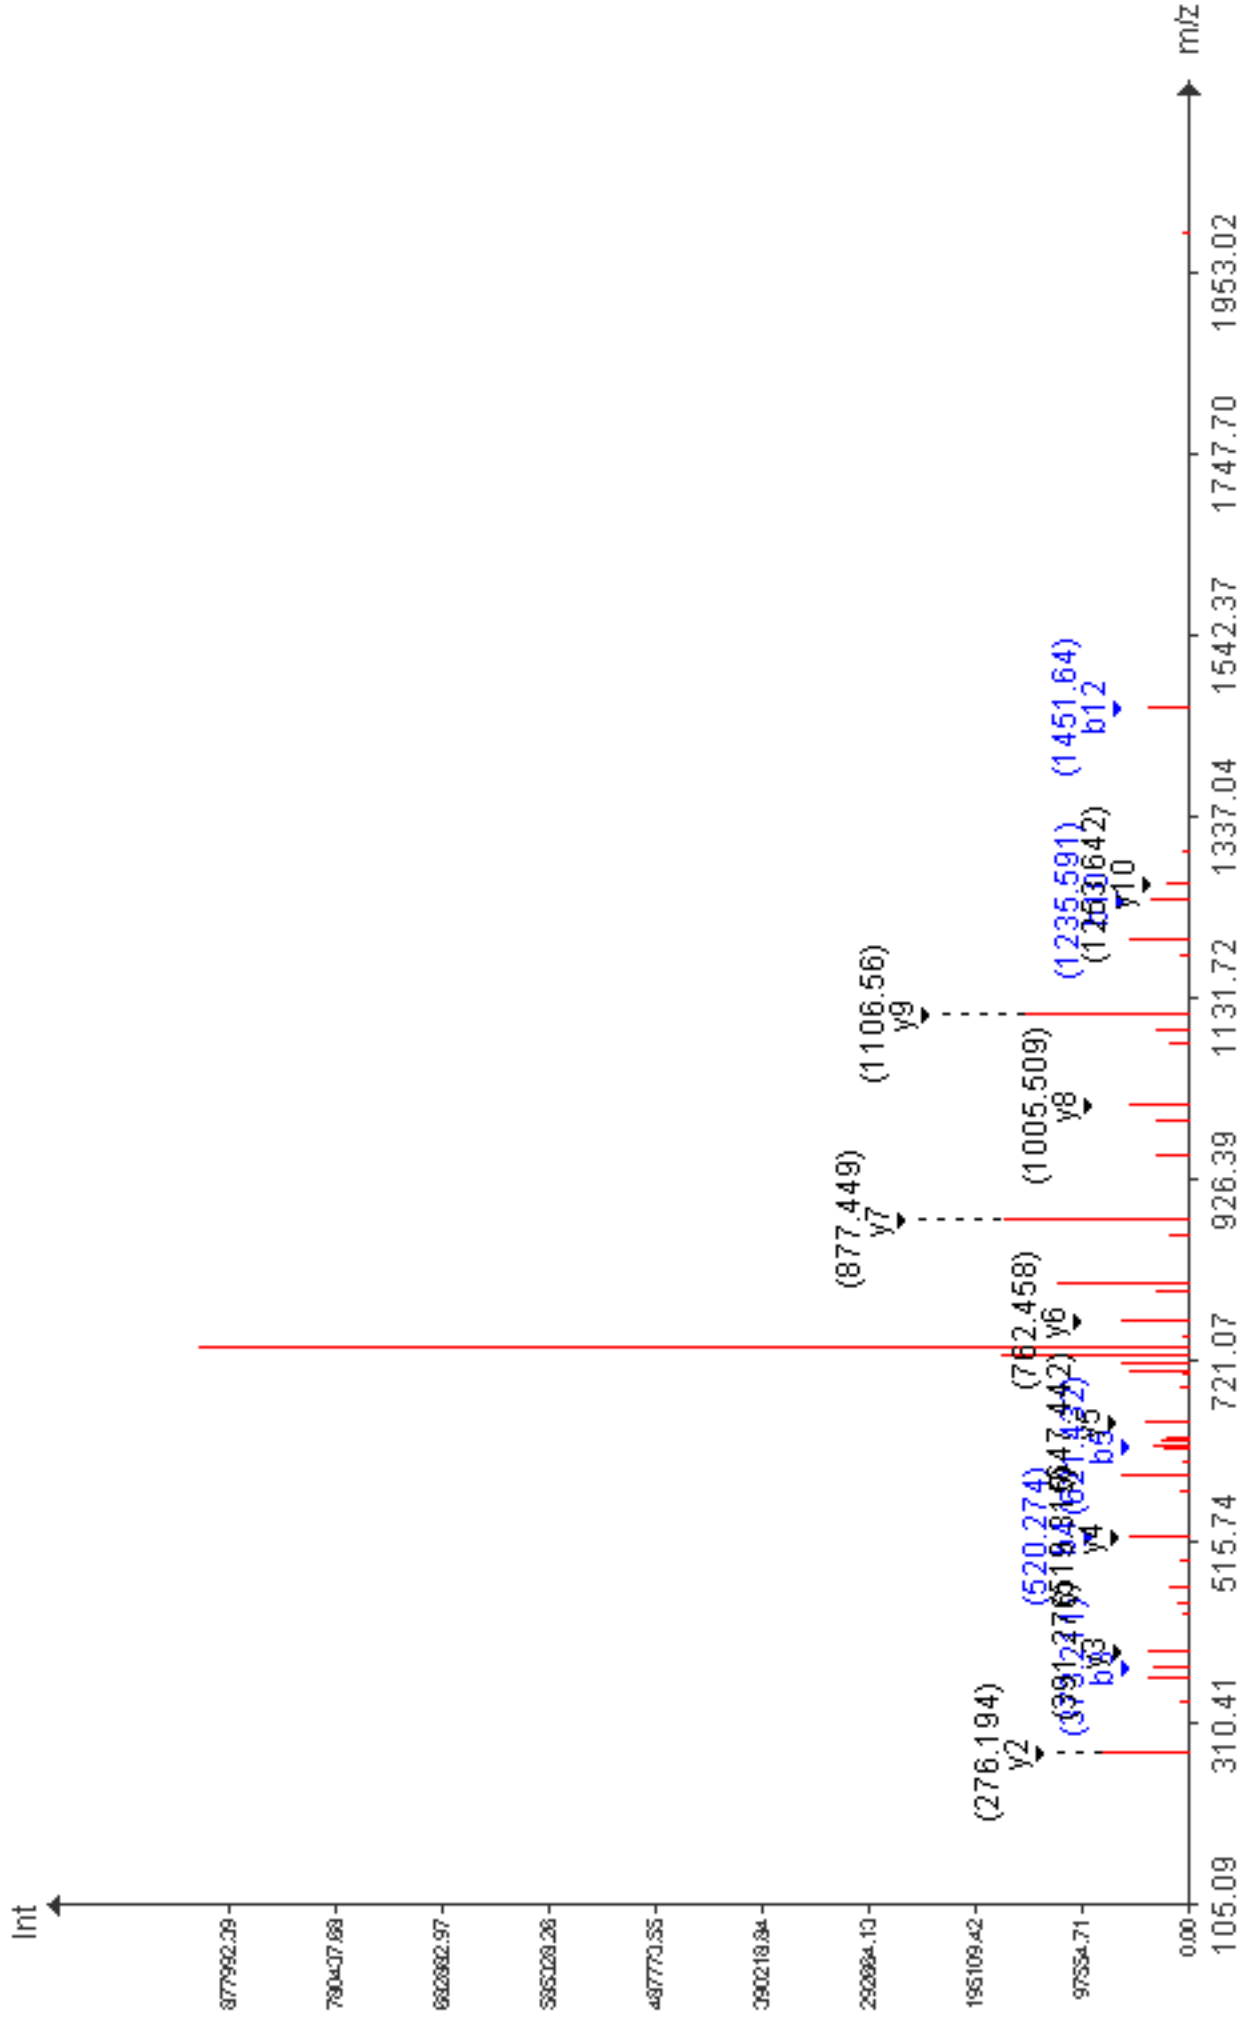



**AcD3-FTQDDQDTR(C13\*)-COOH**

precursor mass: 652.8030 Da (charge: +2) protein: P25206 (534-543)

score (threshold): 35.0 (31.0)

instrument: Bruker Esquire HCT

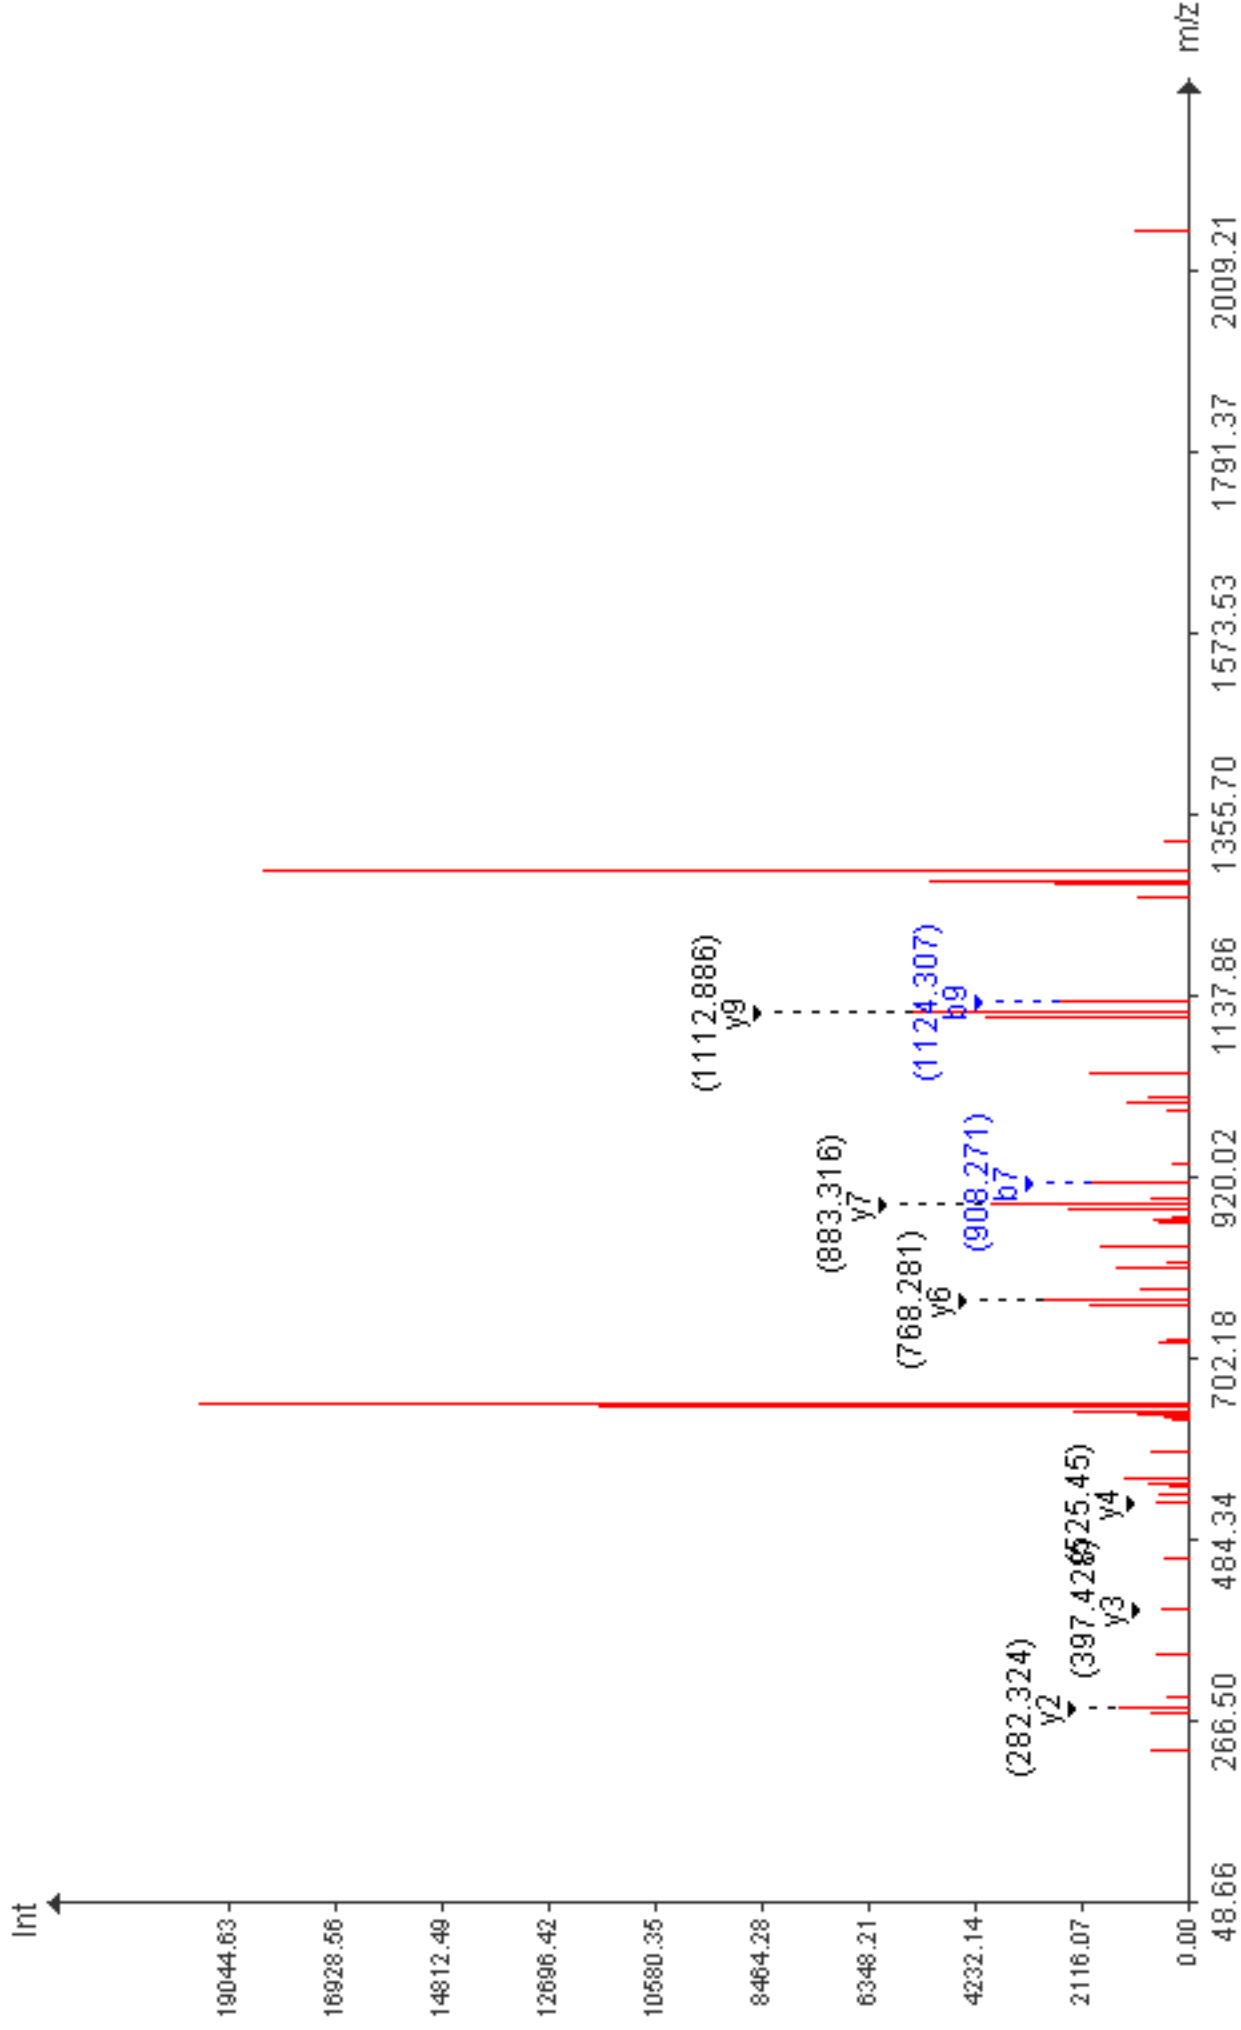

**AcD3-VDGTVVEEDLGK(AcD3K\*)SR-COOH**

precursor mass: 747.9110 Da (charge: +2) protein: P08113 (27-39)

score (threshold): 76.0 (42.0)

instrument: Agilent Esquire HCT

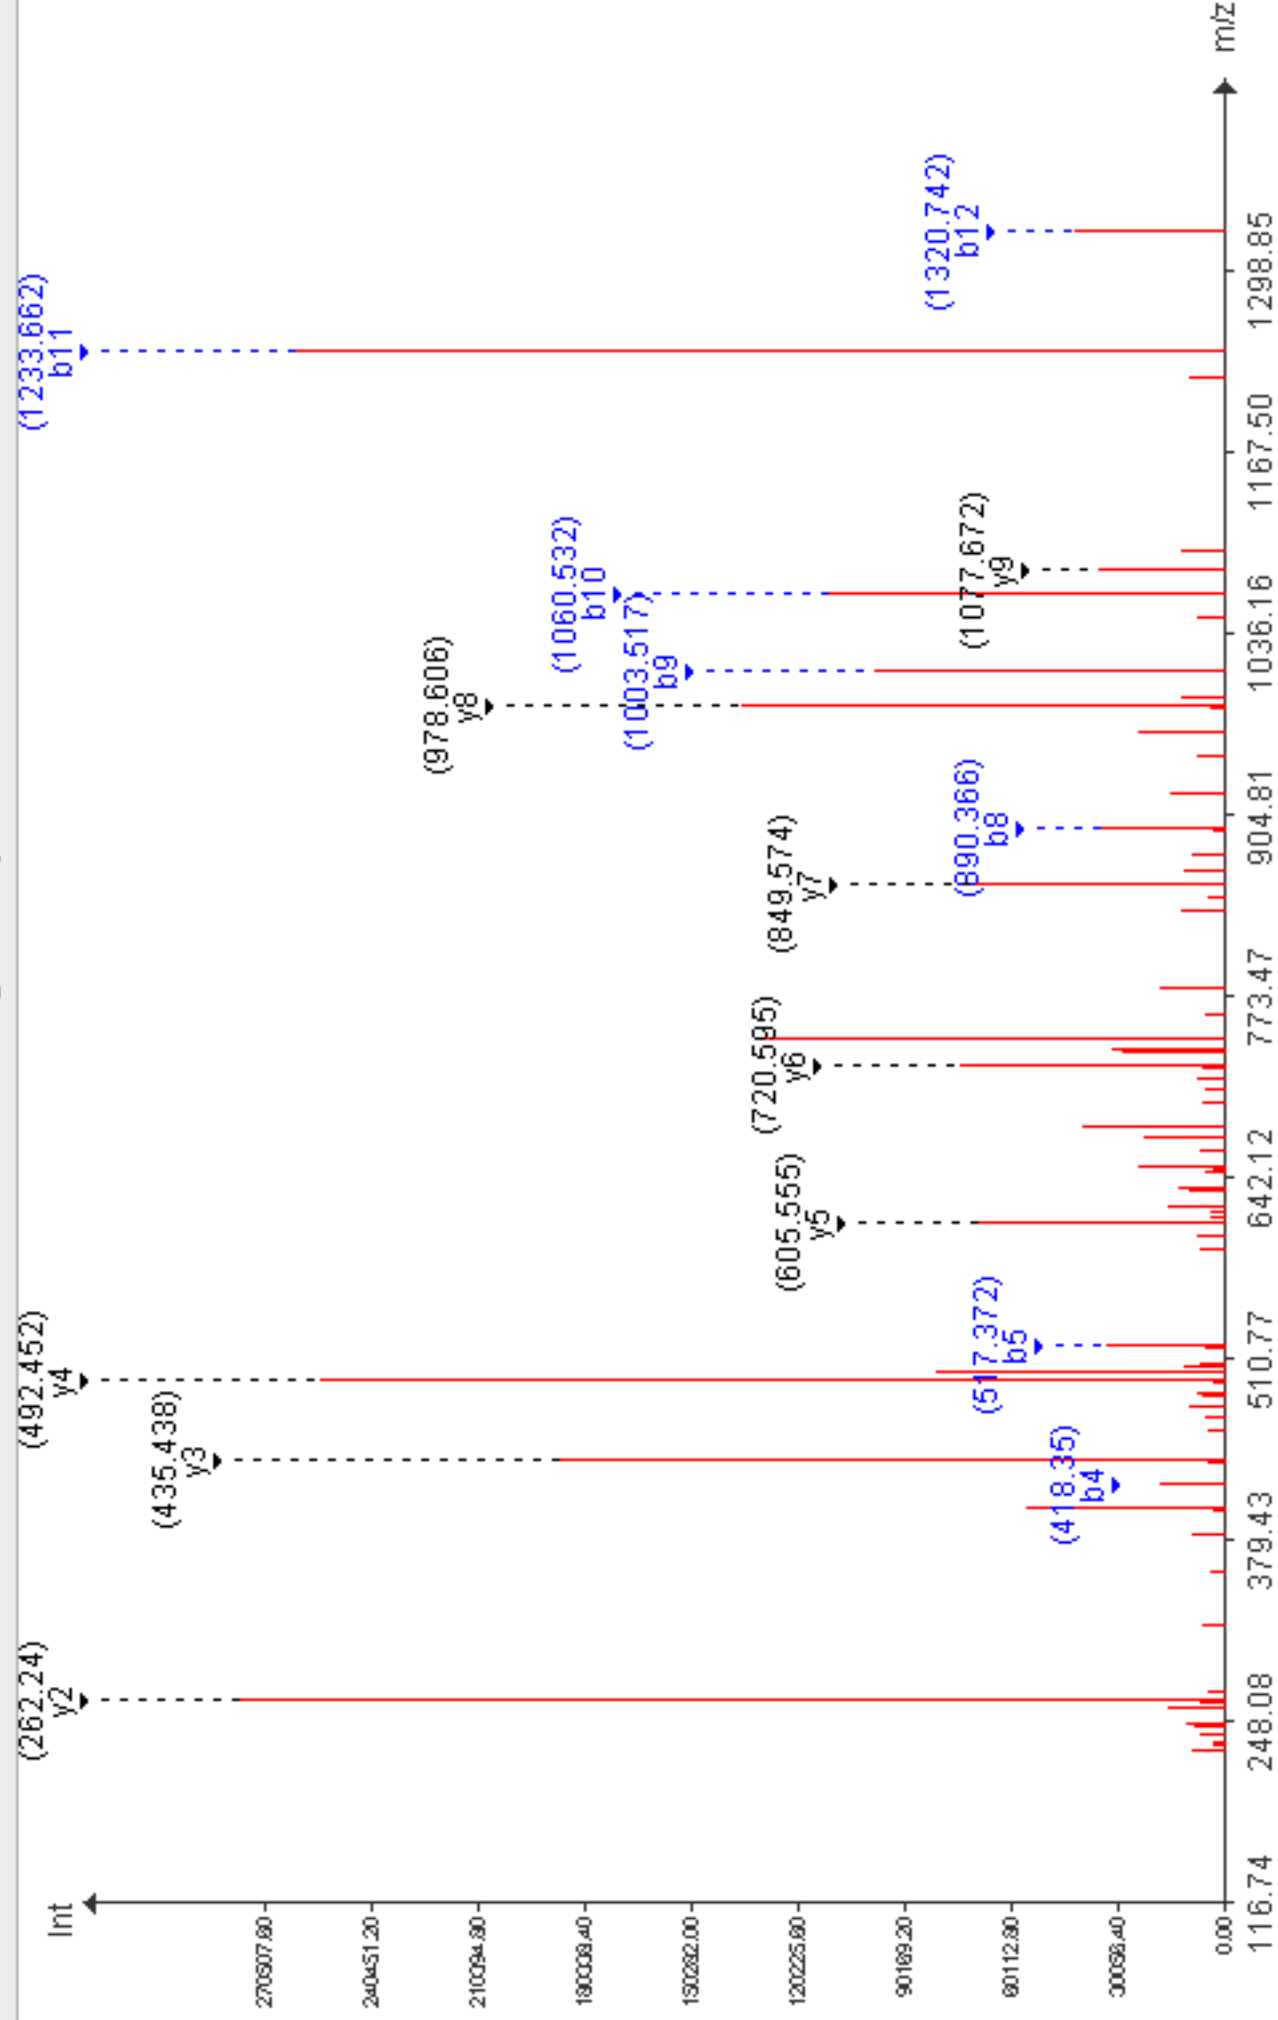

AcD3-GNQVGANDSDDELISR-COOH

precursor mass: 960.9580 Da (charge: +2) protein: Q91WR3 (615-632)

score (threshold): 131.0 (42.0)

instrument: Agilent Esquire HCT

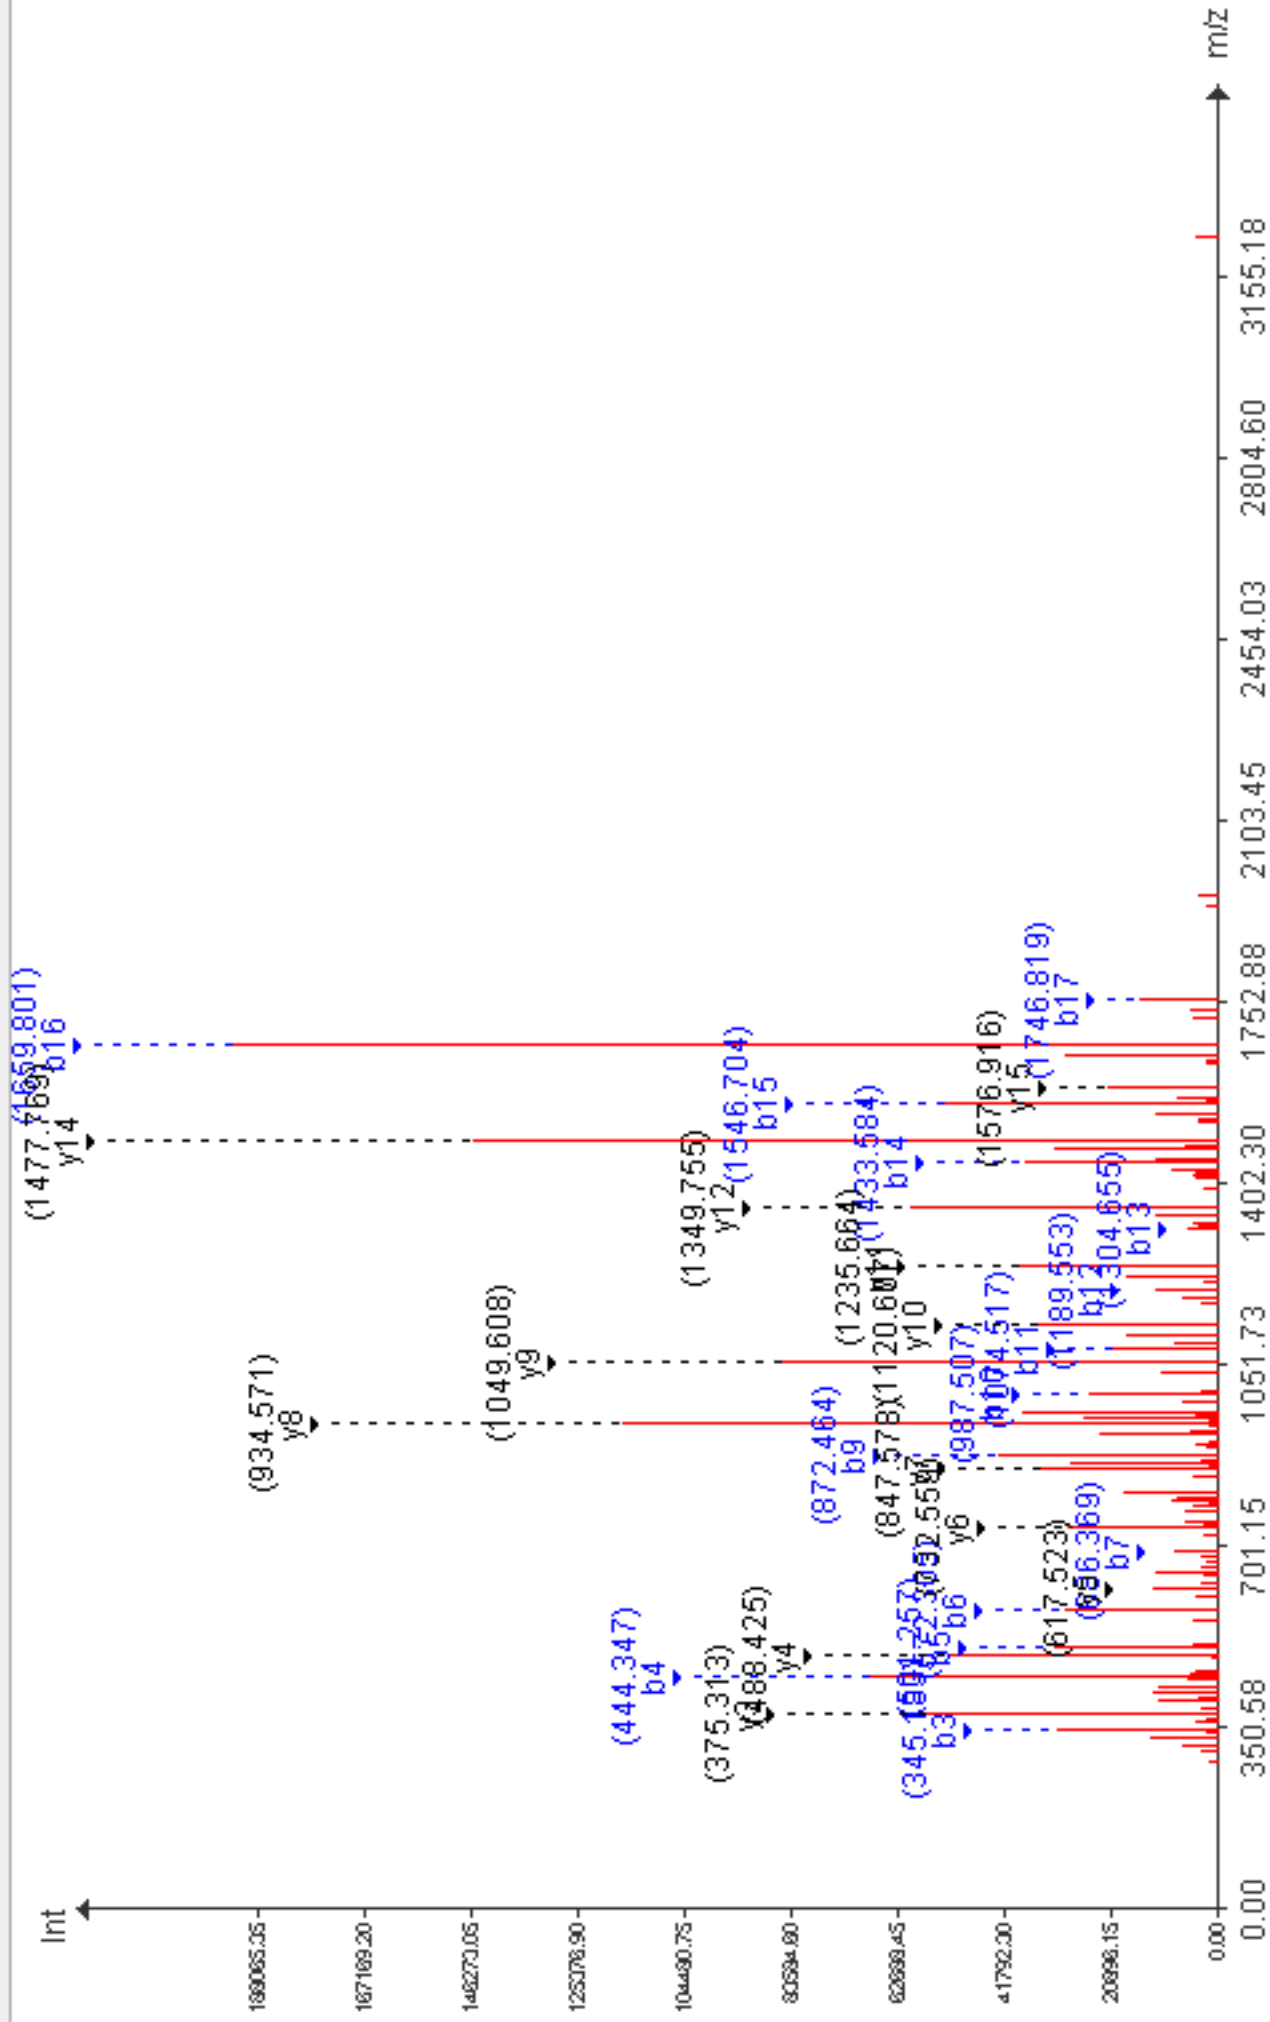

**AcD3-YDSVASEDEDIVETR-COOH**

precursor mass: 873.8850 Da (charge: +2) protein: Q9JLQ2 (391-405)

score (threshold): 90.0 (42.0)

instrument: Agilent Esquire HCT

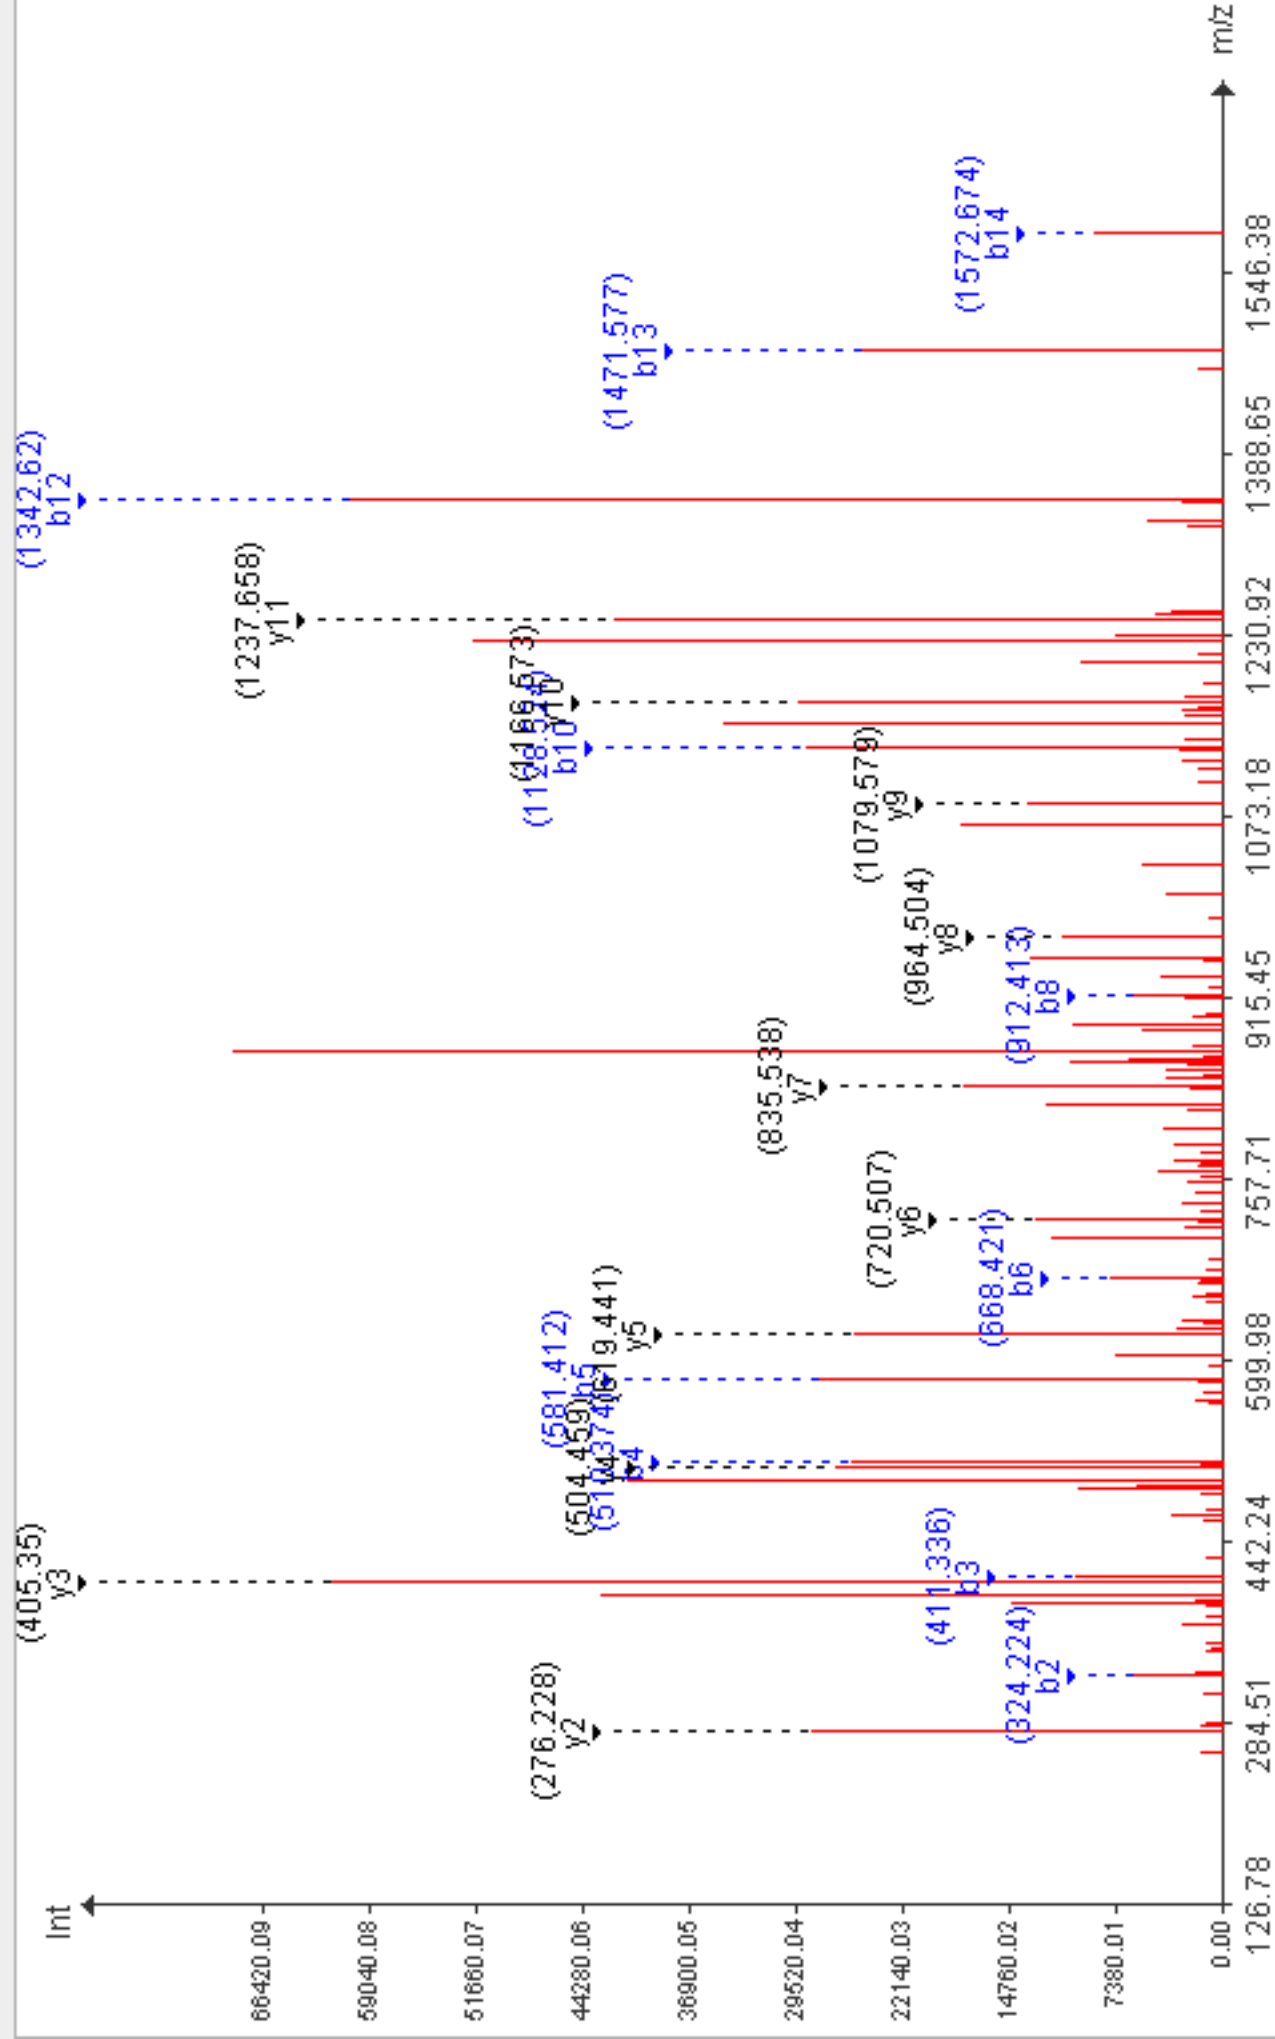

**AcD3-SLK(AcD3K\*)EALTYDGALLGDR-COOH**

precursor mass: 906.3990 Da (charge: +2) protein: Q9WUJ2 (93-108)

score (threshold): 72.0 (47.0)

instrument: Agilent Esquire HCT

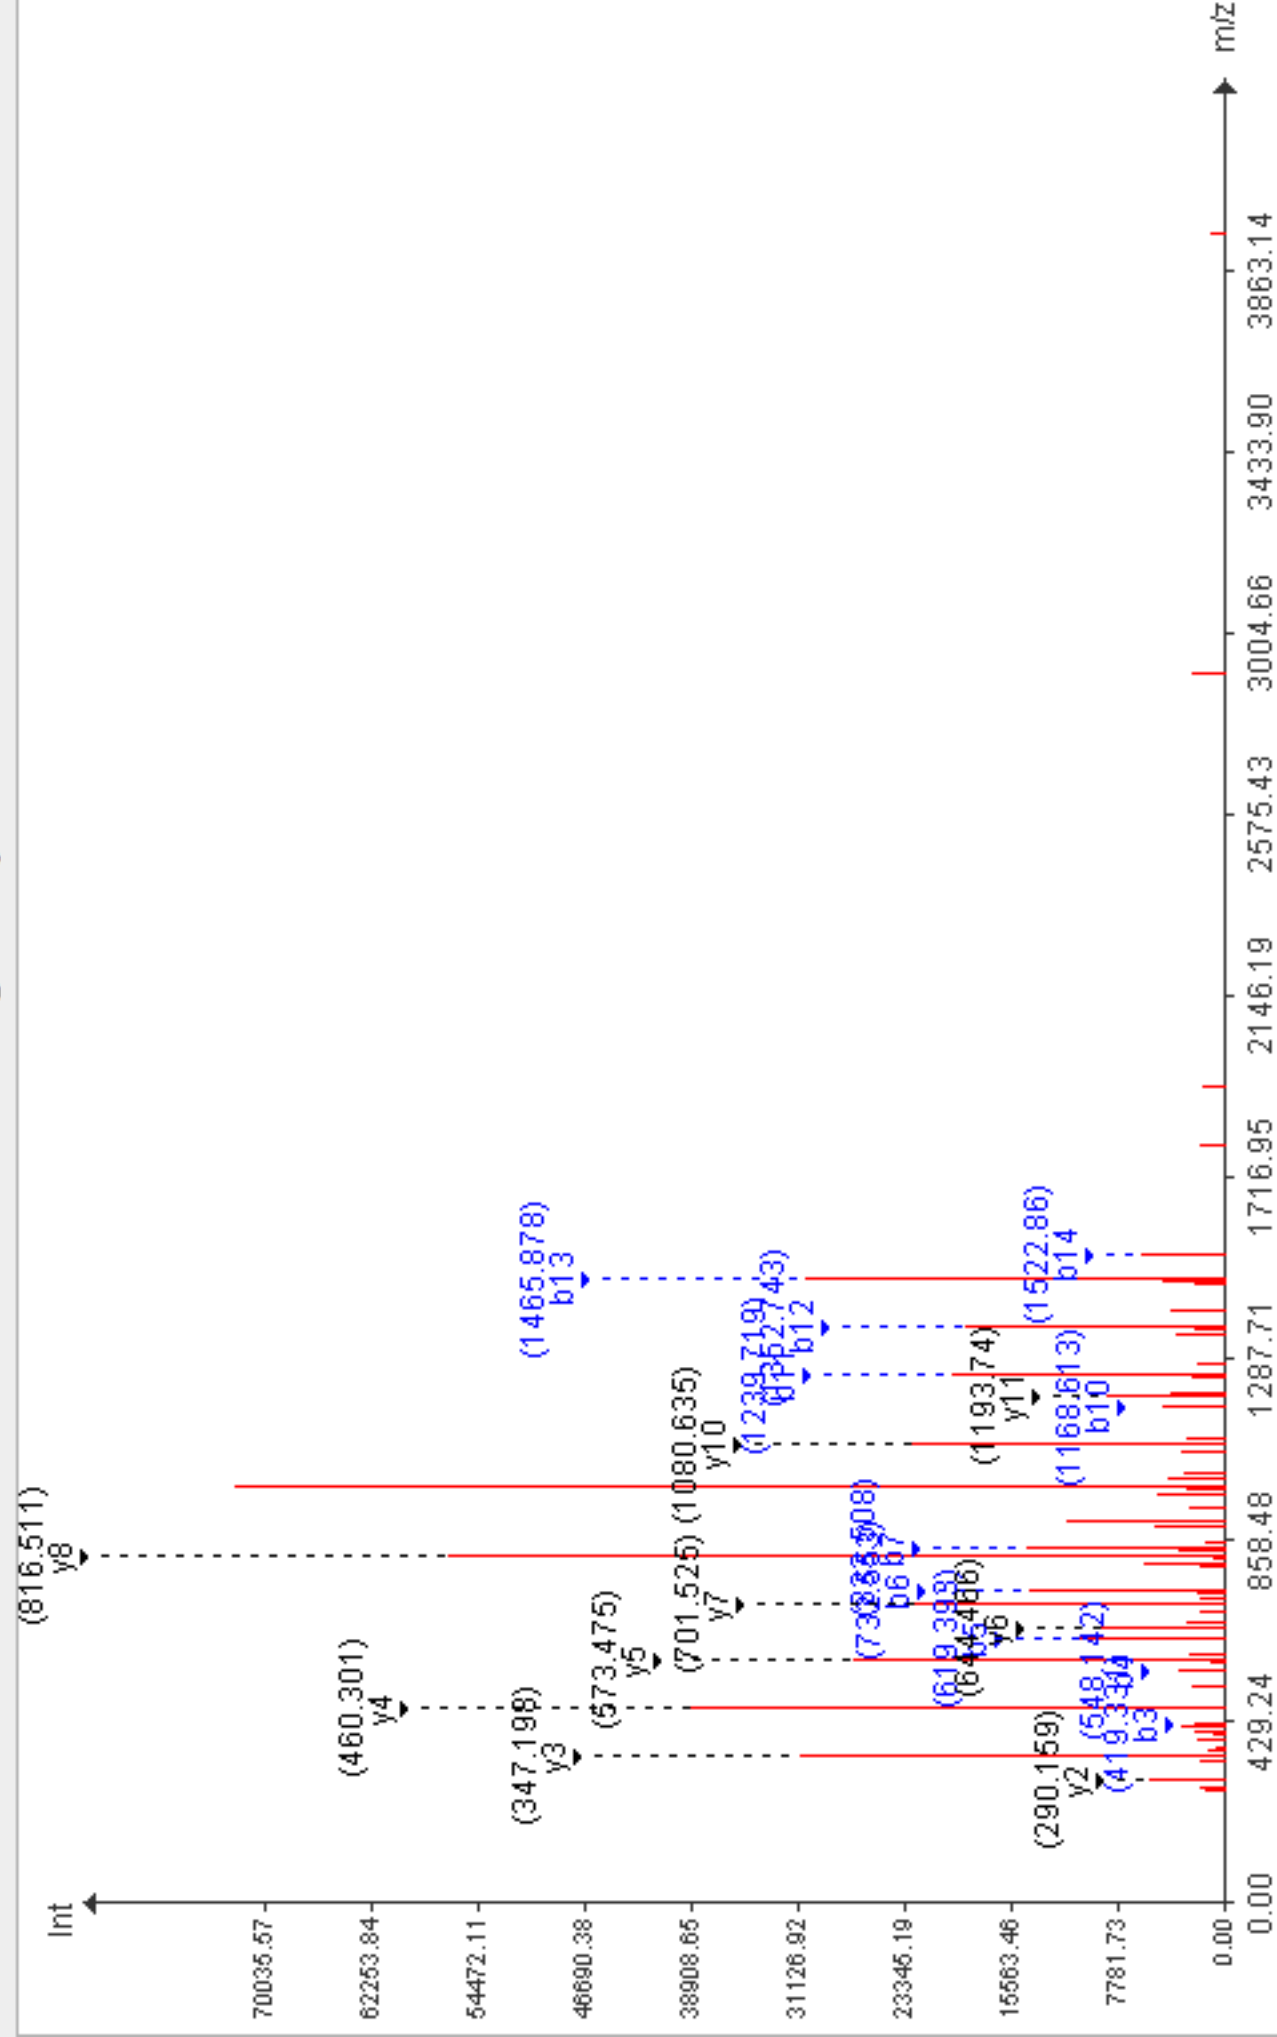

**AcD3-AAVADPDEFER-COOH**

precursor mass: 632.8480 Da (charge: +2) protein: P47713 (522-532)

score (threshold): 58.0 (42.0)

instrument: Agilent Esquire HCT

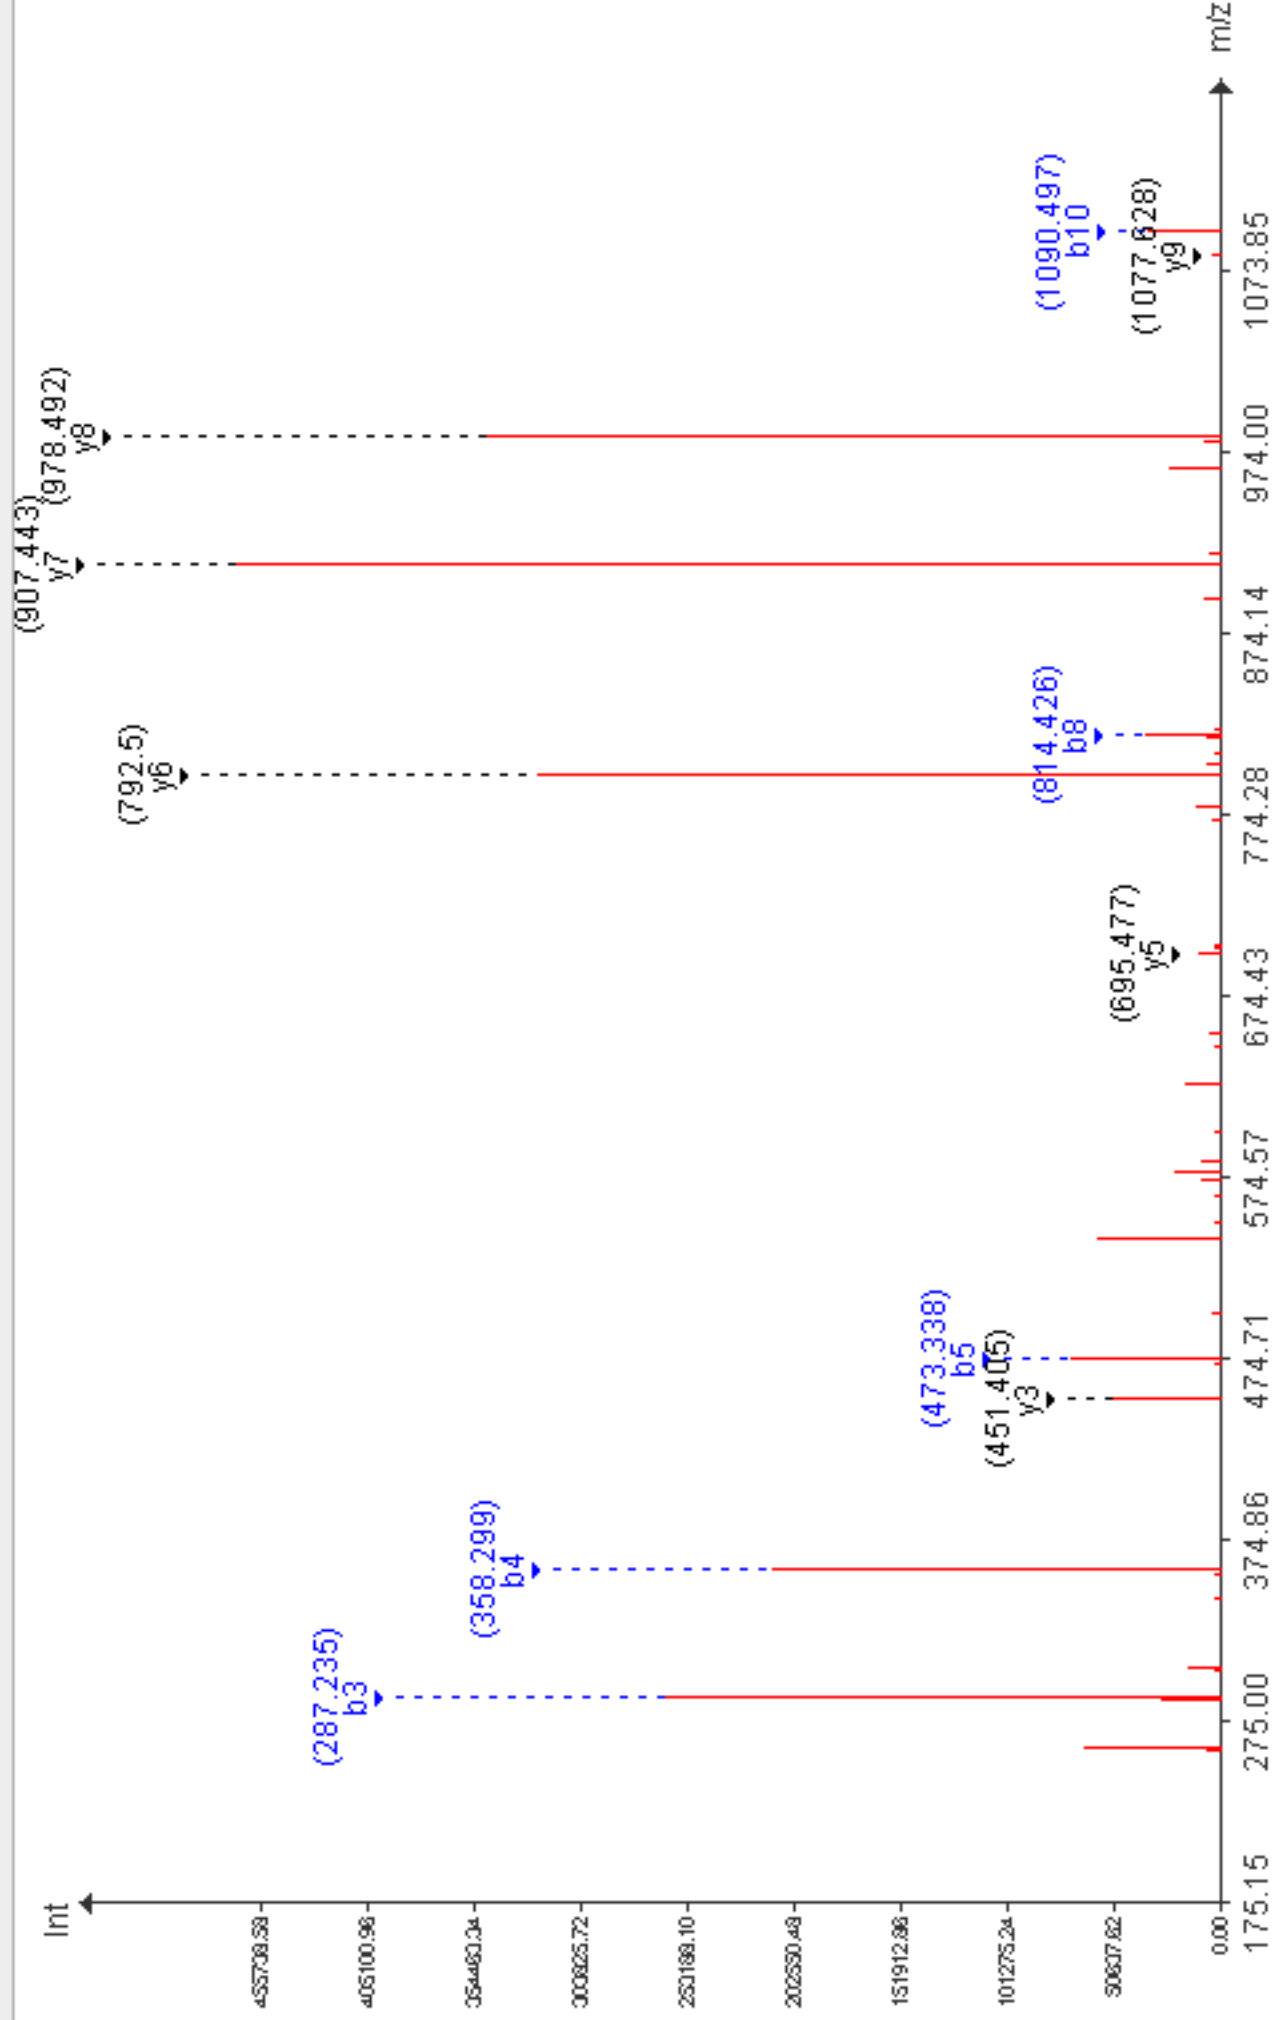

**AcD3-GK(AcD3K\*)PLQEQM(Mox)DLLLLR-COOH**

precursor mass: 881.5200 Da (charge: +2) protein: Q61211 (244-257)

score (threshold): 66.0 (42.0)

instrument: Agilent Esquire HCT

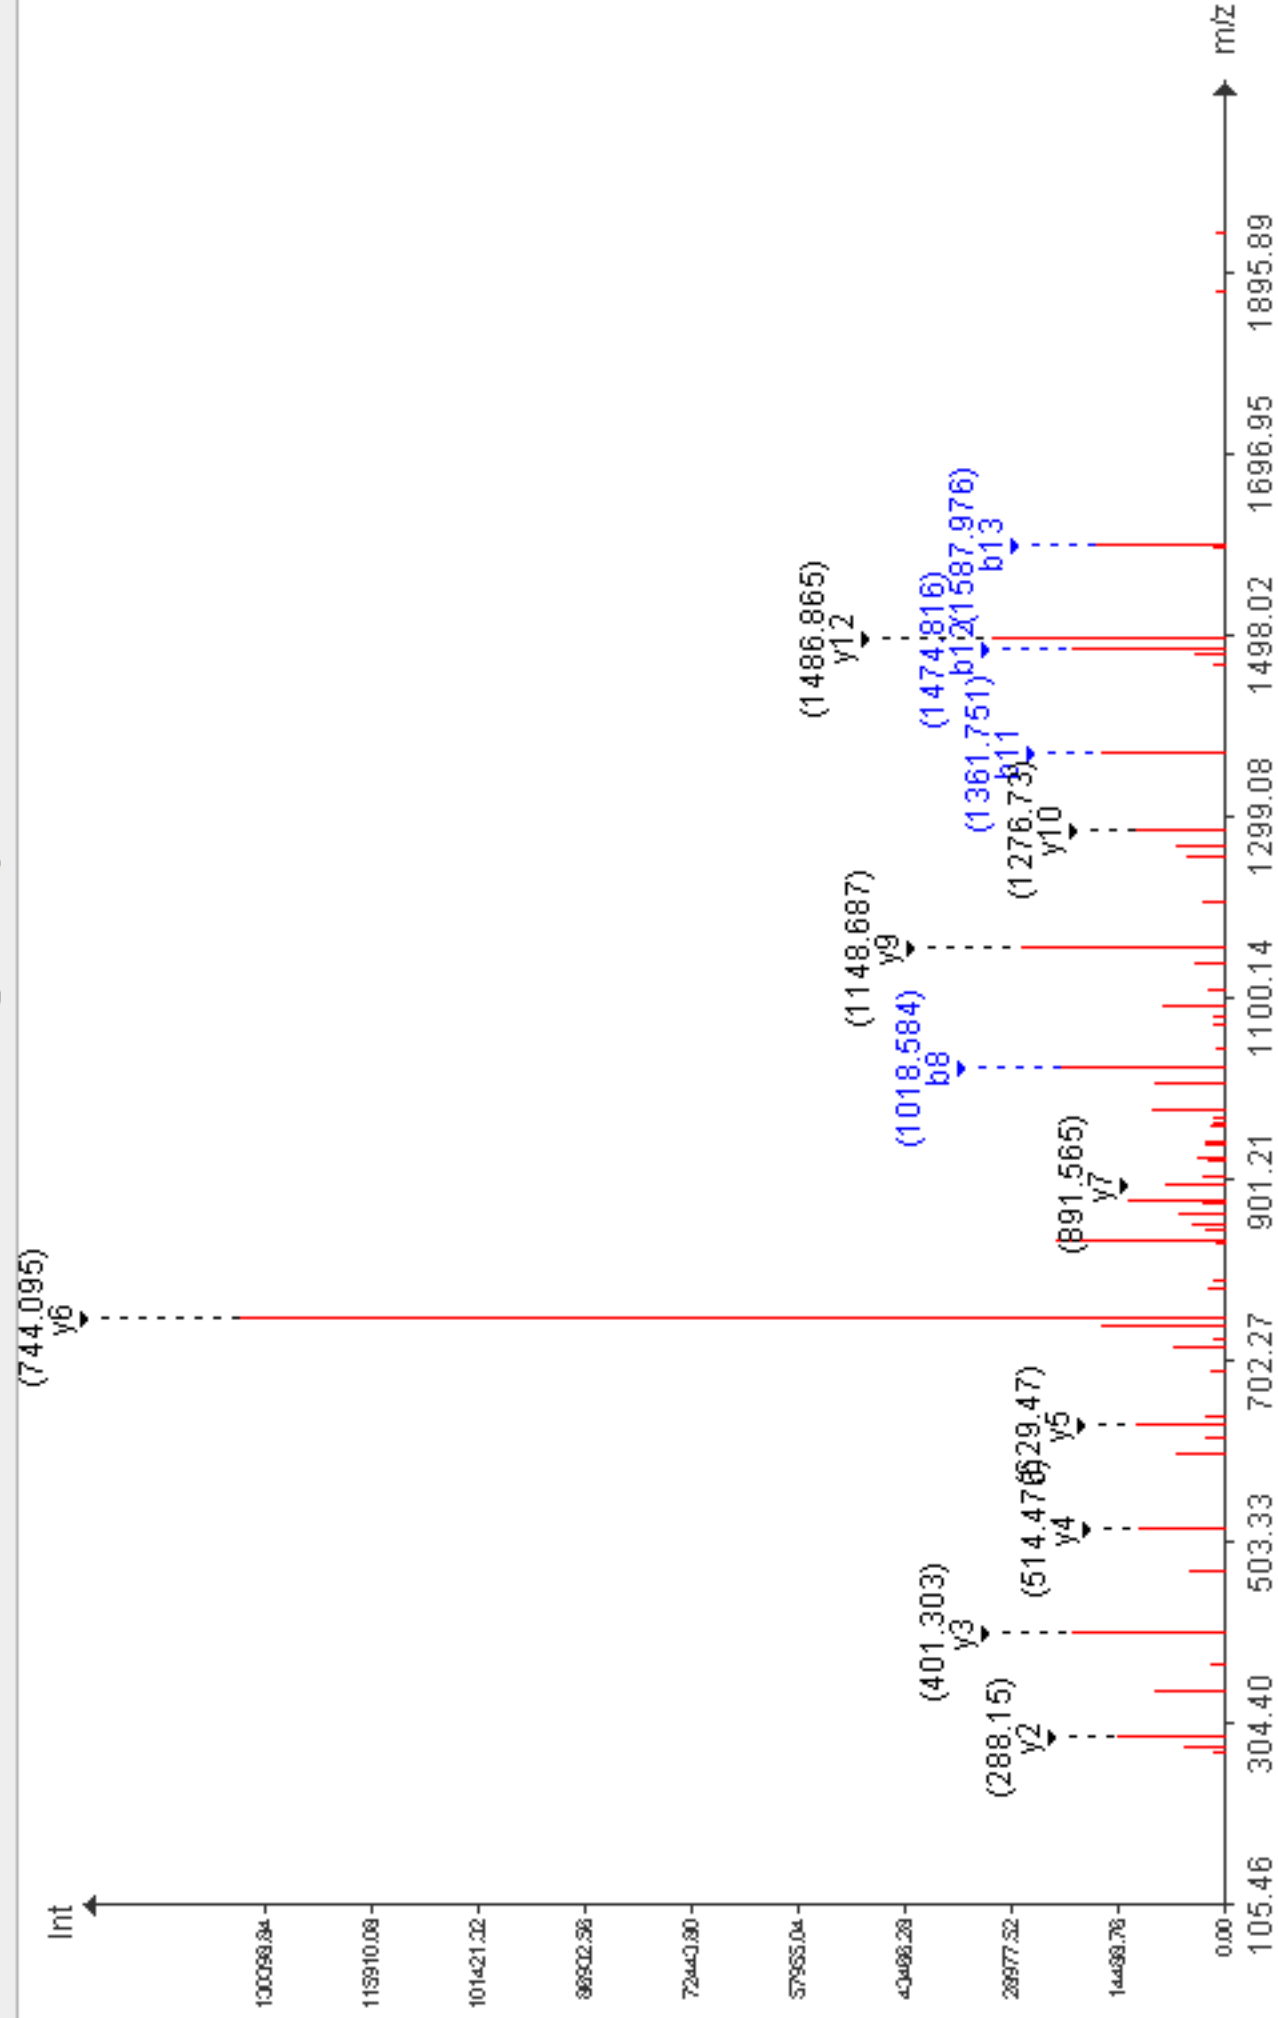

**AcD3-M(Mox)GPDPAATNN(Dam)LSQLAGM(Mox)NLGSR-COOH**  
precursor mass: 794.0430 Da (charge: +3) protein: O88746 (325-347)

score (threshold): 45.0 (43.0)

instrument: Agilent Esquire HCT

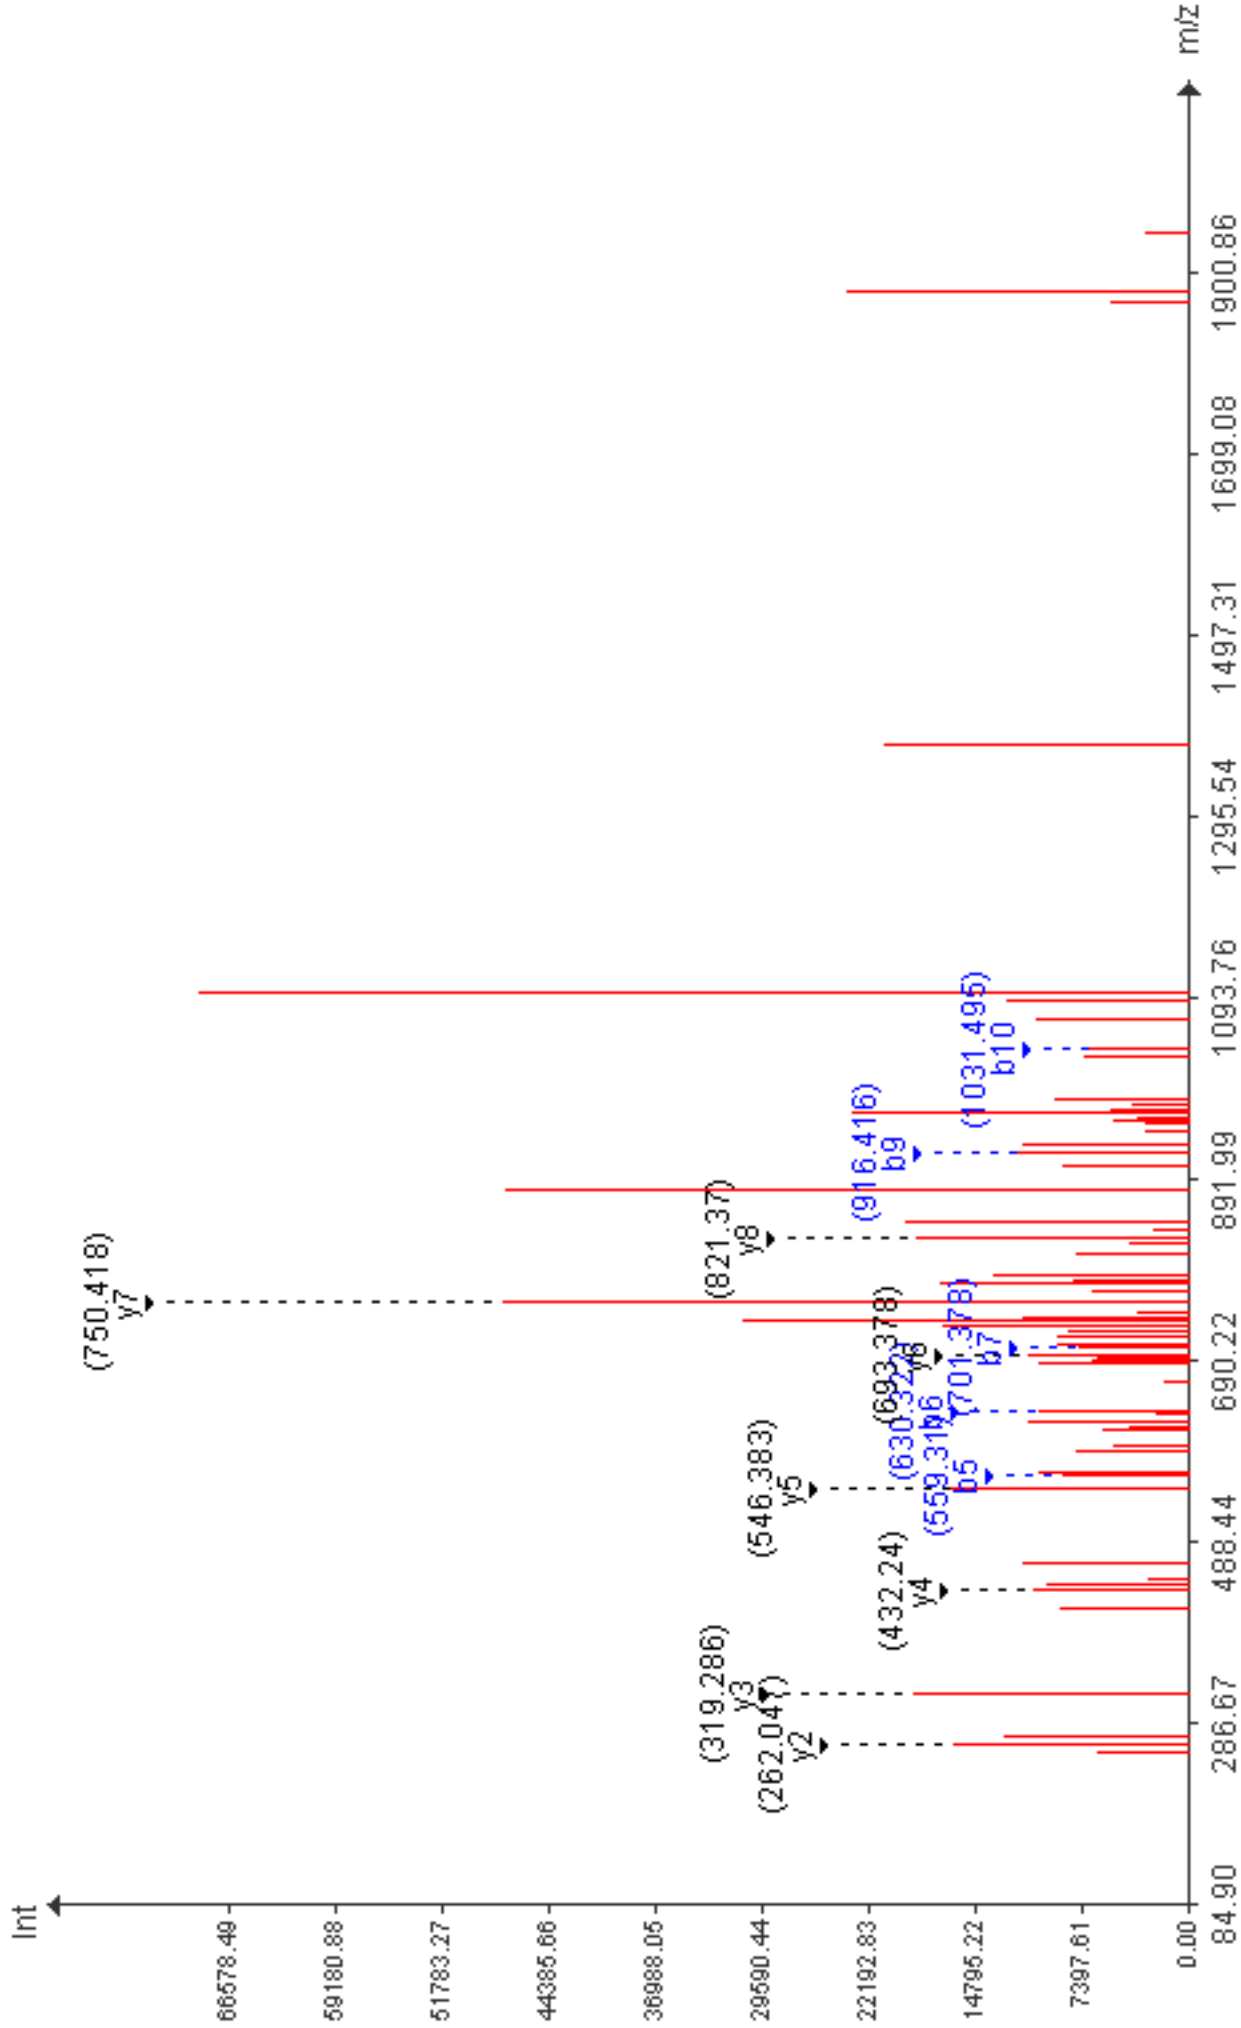



**AcD3-SDFIDEGDEPSSDGEAEPR-COOH**

precursor mass: 780.9510 Da (charge: +3) protein: Q62481 (59-79)

score (threshold): 40.0 (38.0)

instrument: Agilent Esquire HCT

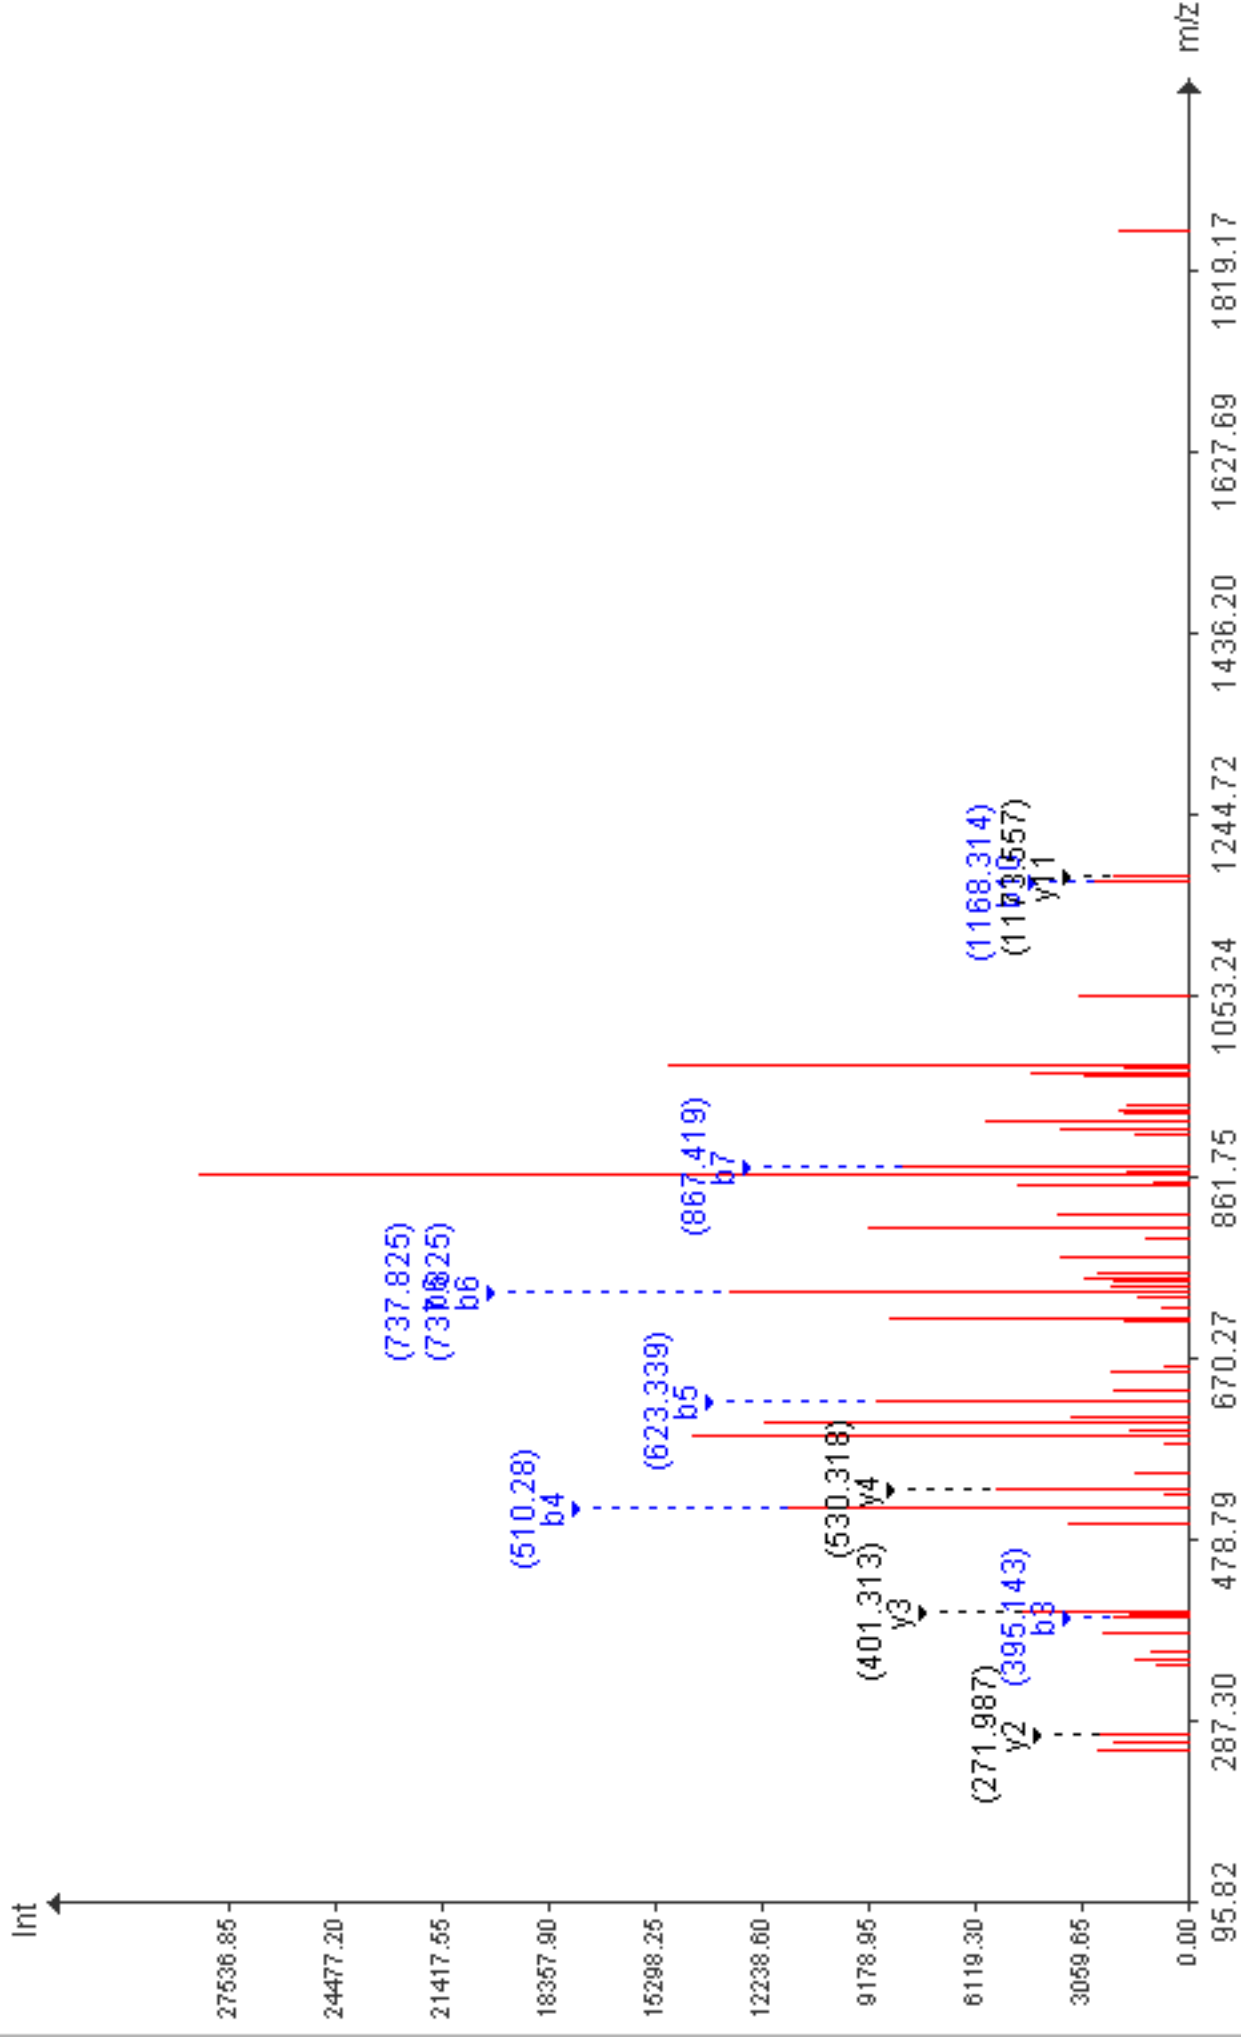

**AcD3-GTELYEDSQLSNR-COOH**

precursor mass: 778.8580 Da (charge: +2) protein: Q8K2H1 (292-304)

score (threshold): 71.0 (47.0)

instrument: Agilent Esquire HCT

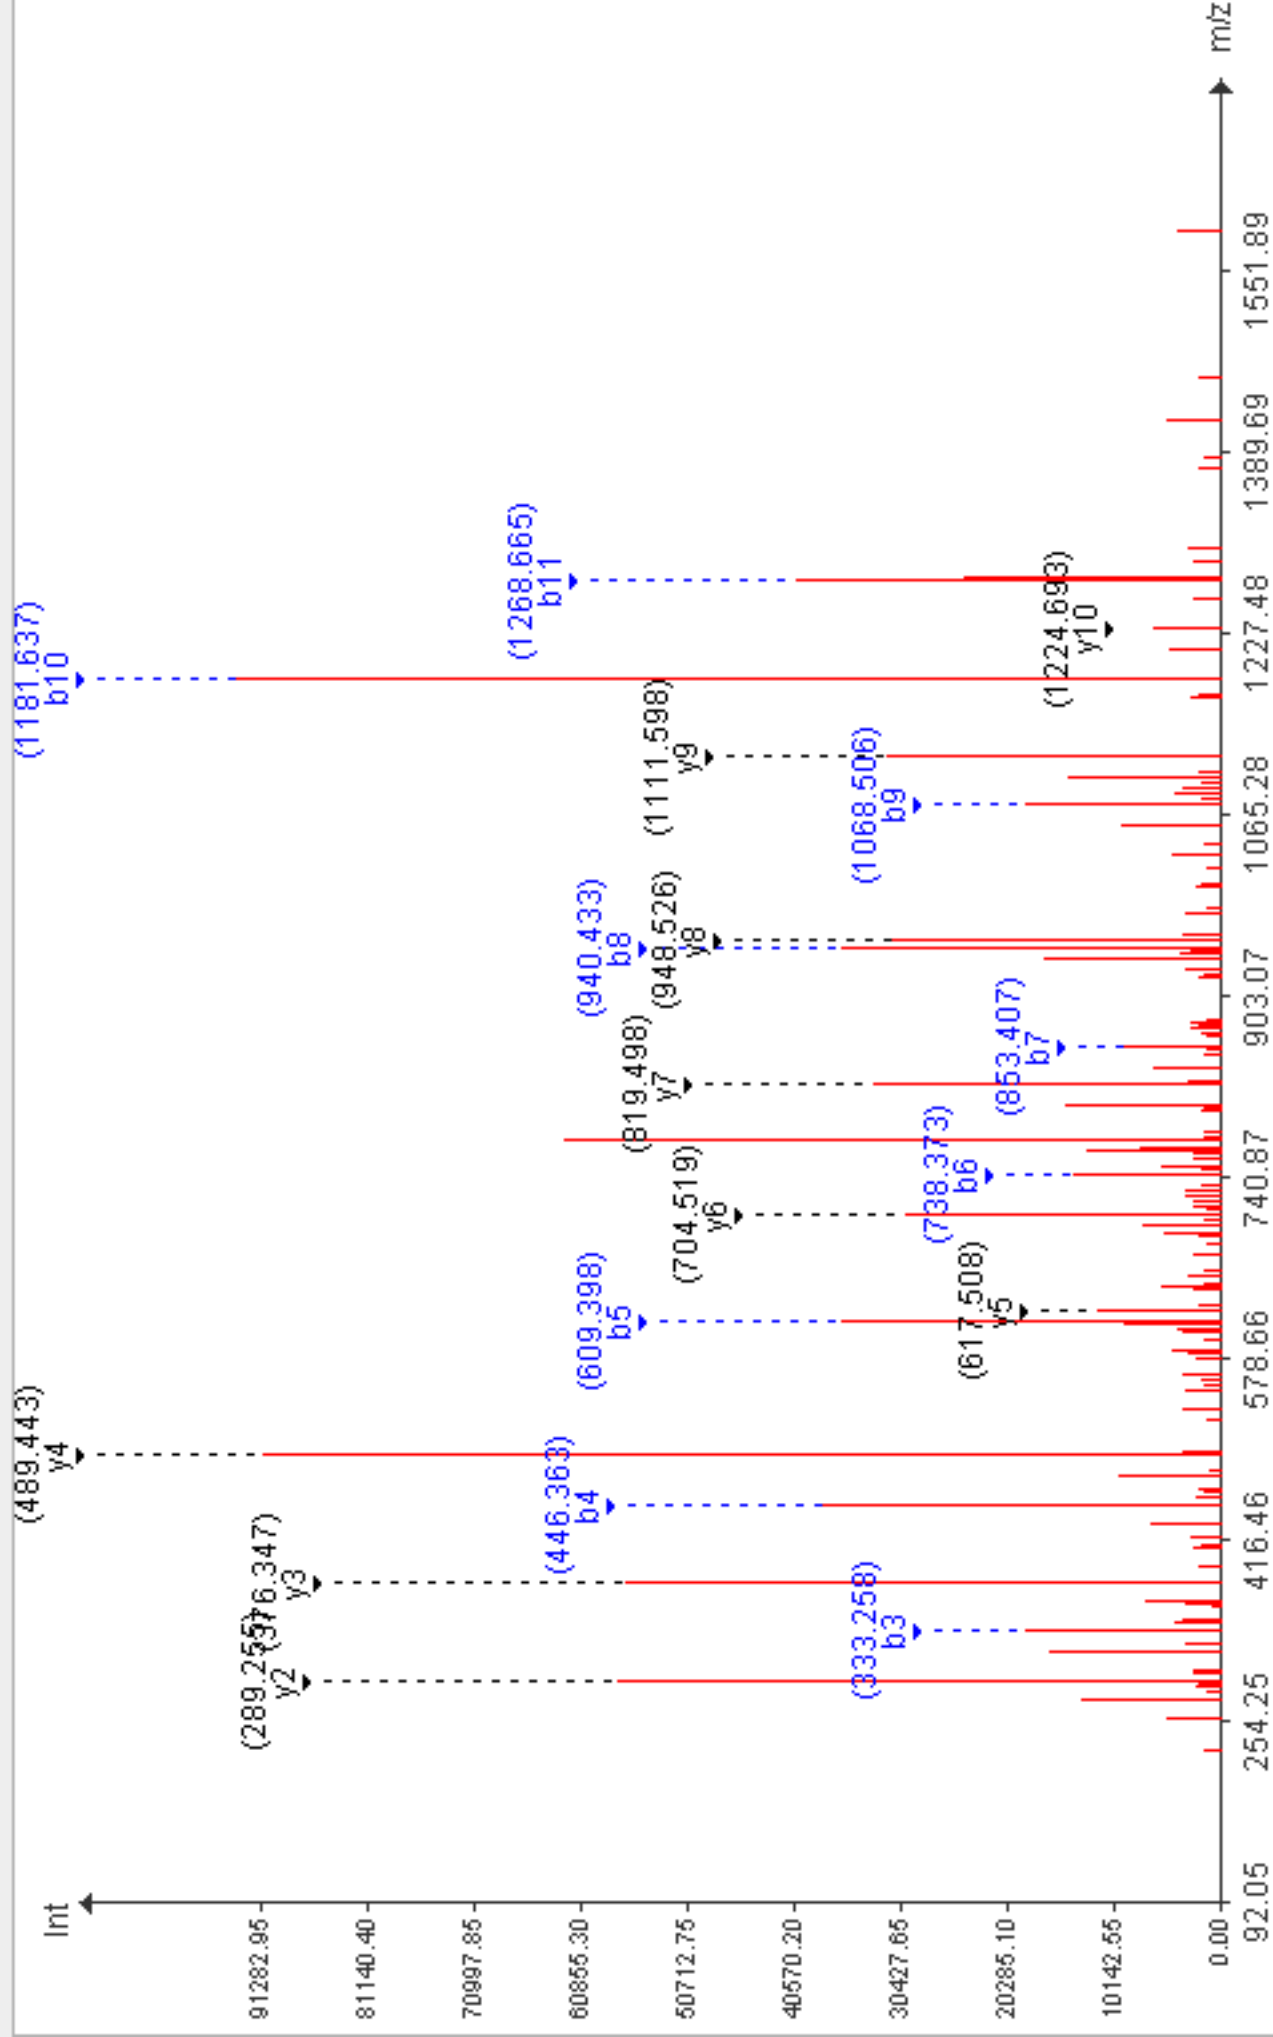

**AcD3-GQVITIGNER-COOH**

precursor mass: 566.3810 Da (charge: +2) protein: P62737 (247-256)

score (threshold): 87.0 (41.0)

instrument: Agilent Esquire HCT

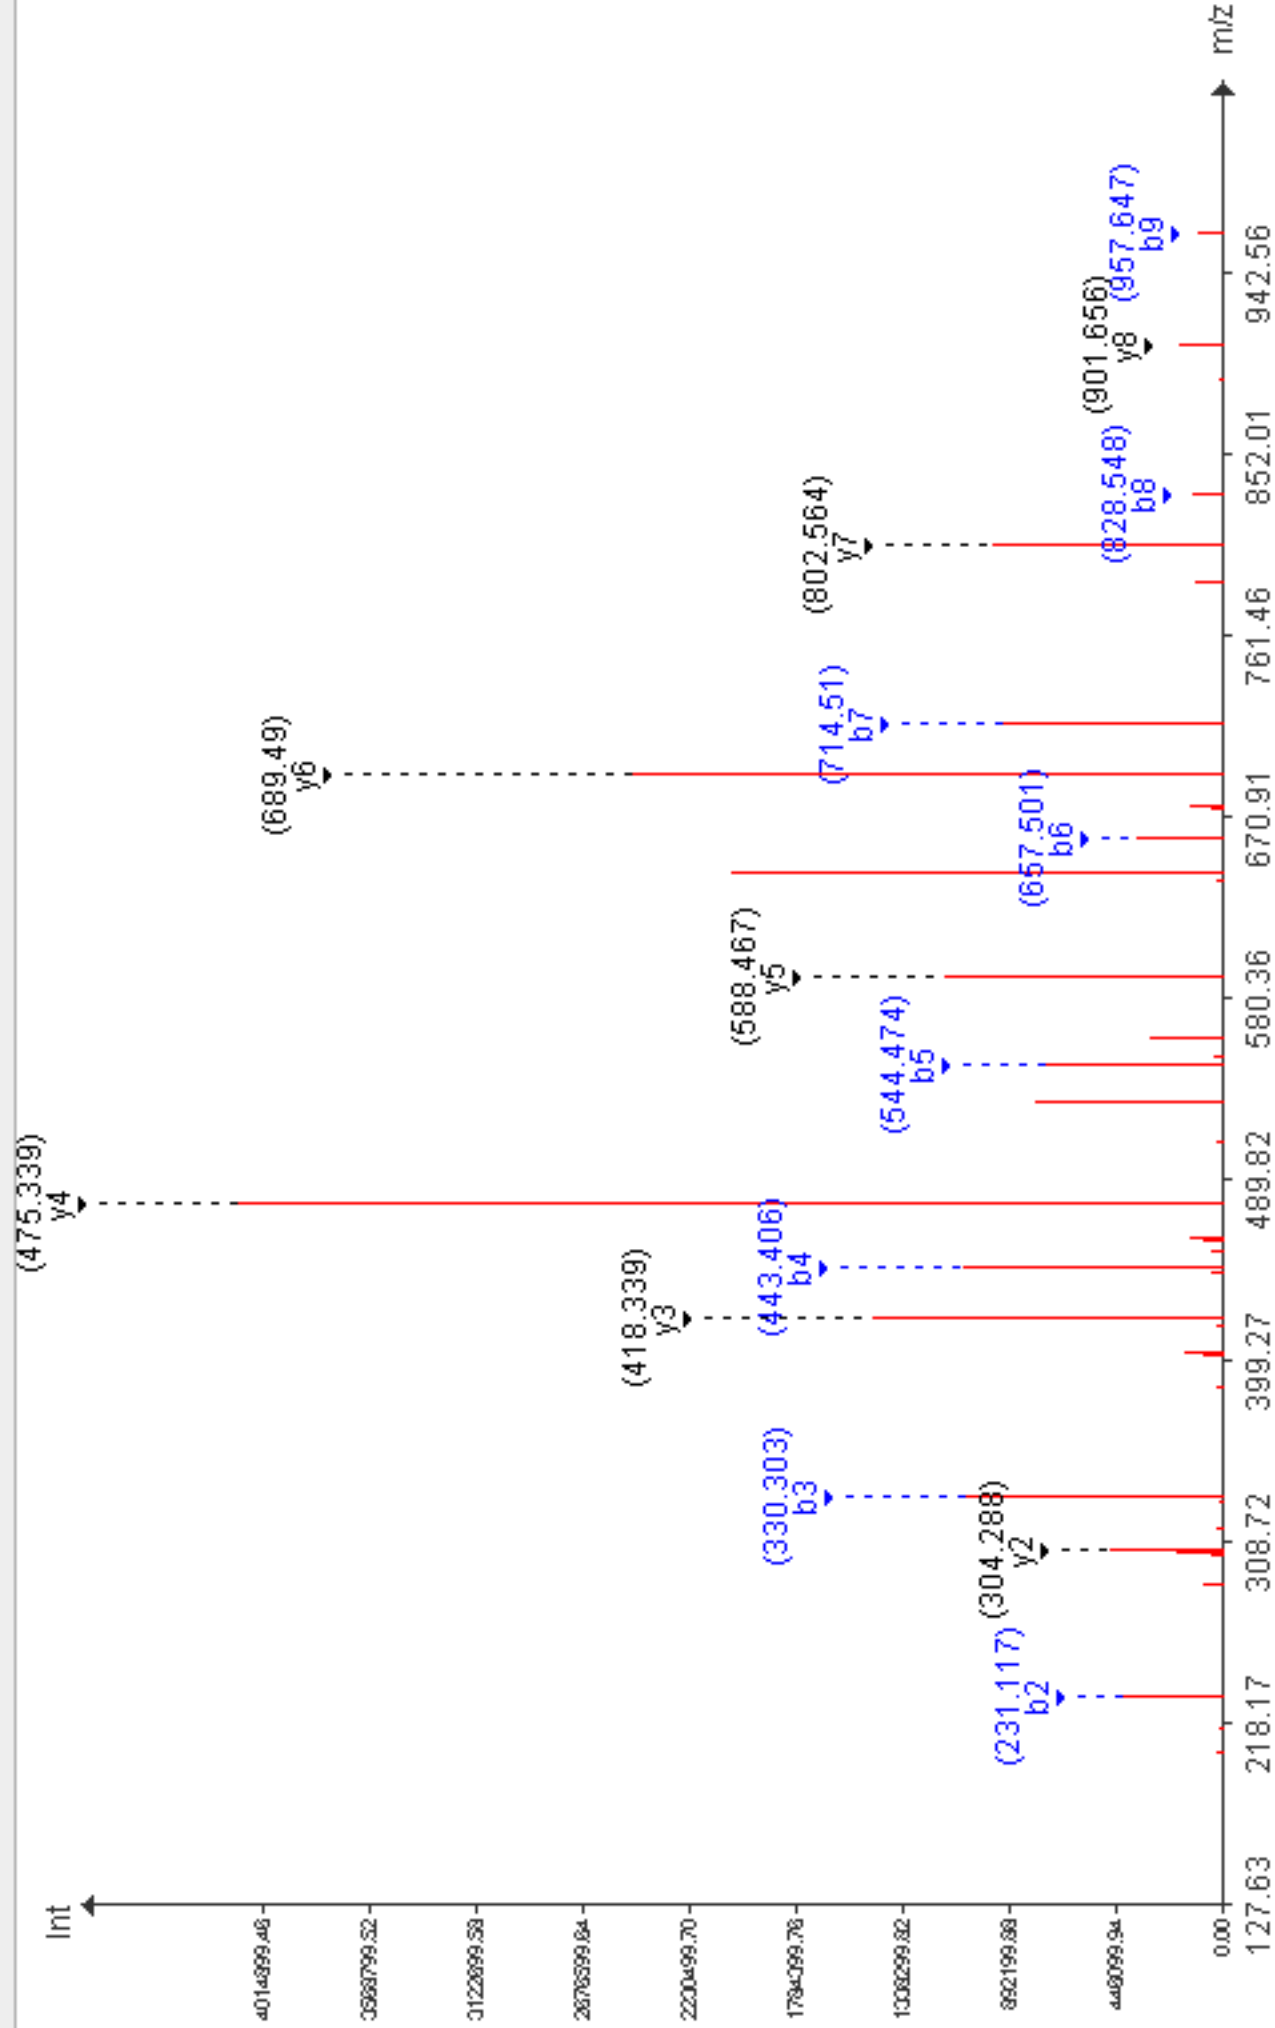

AcD3-GAQTGGLGFNLR-COOH

precursor mass: 618.3240 Da (charge: +2) protein: Q61152 (425-436)

score (threshold): 81.0 (42.0)

instrument: Agilent Esquire HCT

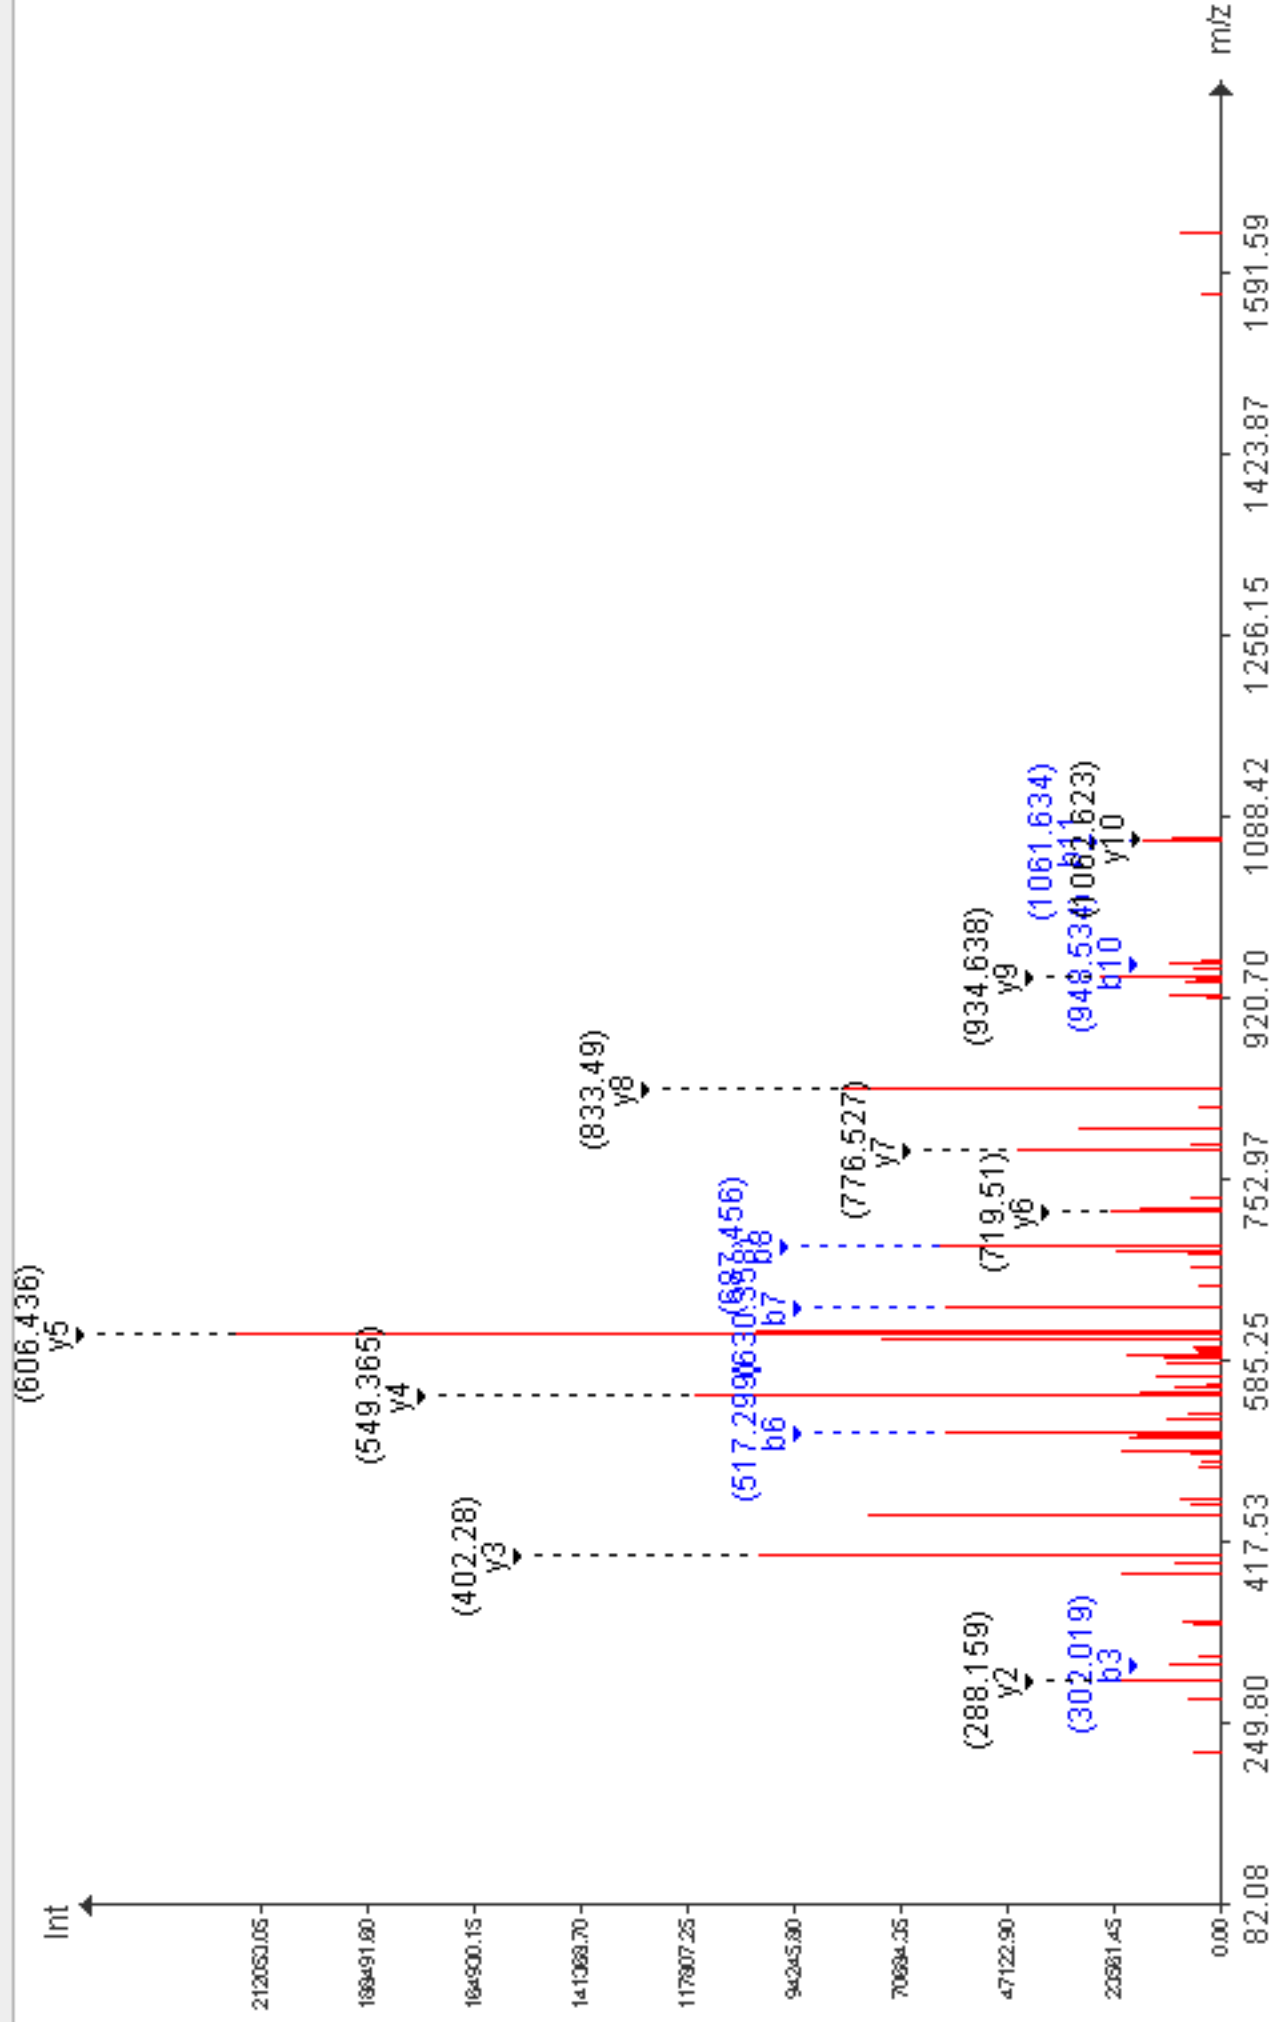

## **MS/MS-spectra of proteins in Supplementary Table 1**

**ACD3-TIIENPFLN(Dam)GEVIR-COOH**

precursor mass: 830.9200 Da (charge: +2) protein: O08756 (238-251)

score (threshold): 57.0 (47.0)

instrument: Agilent Esquire HCT

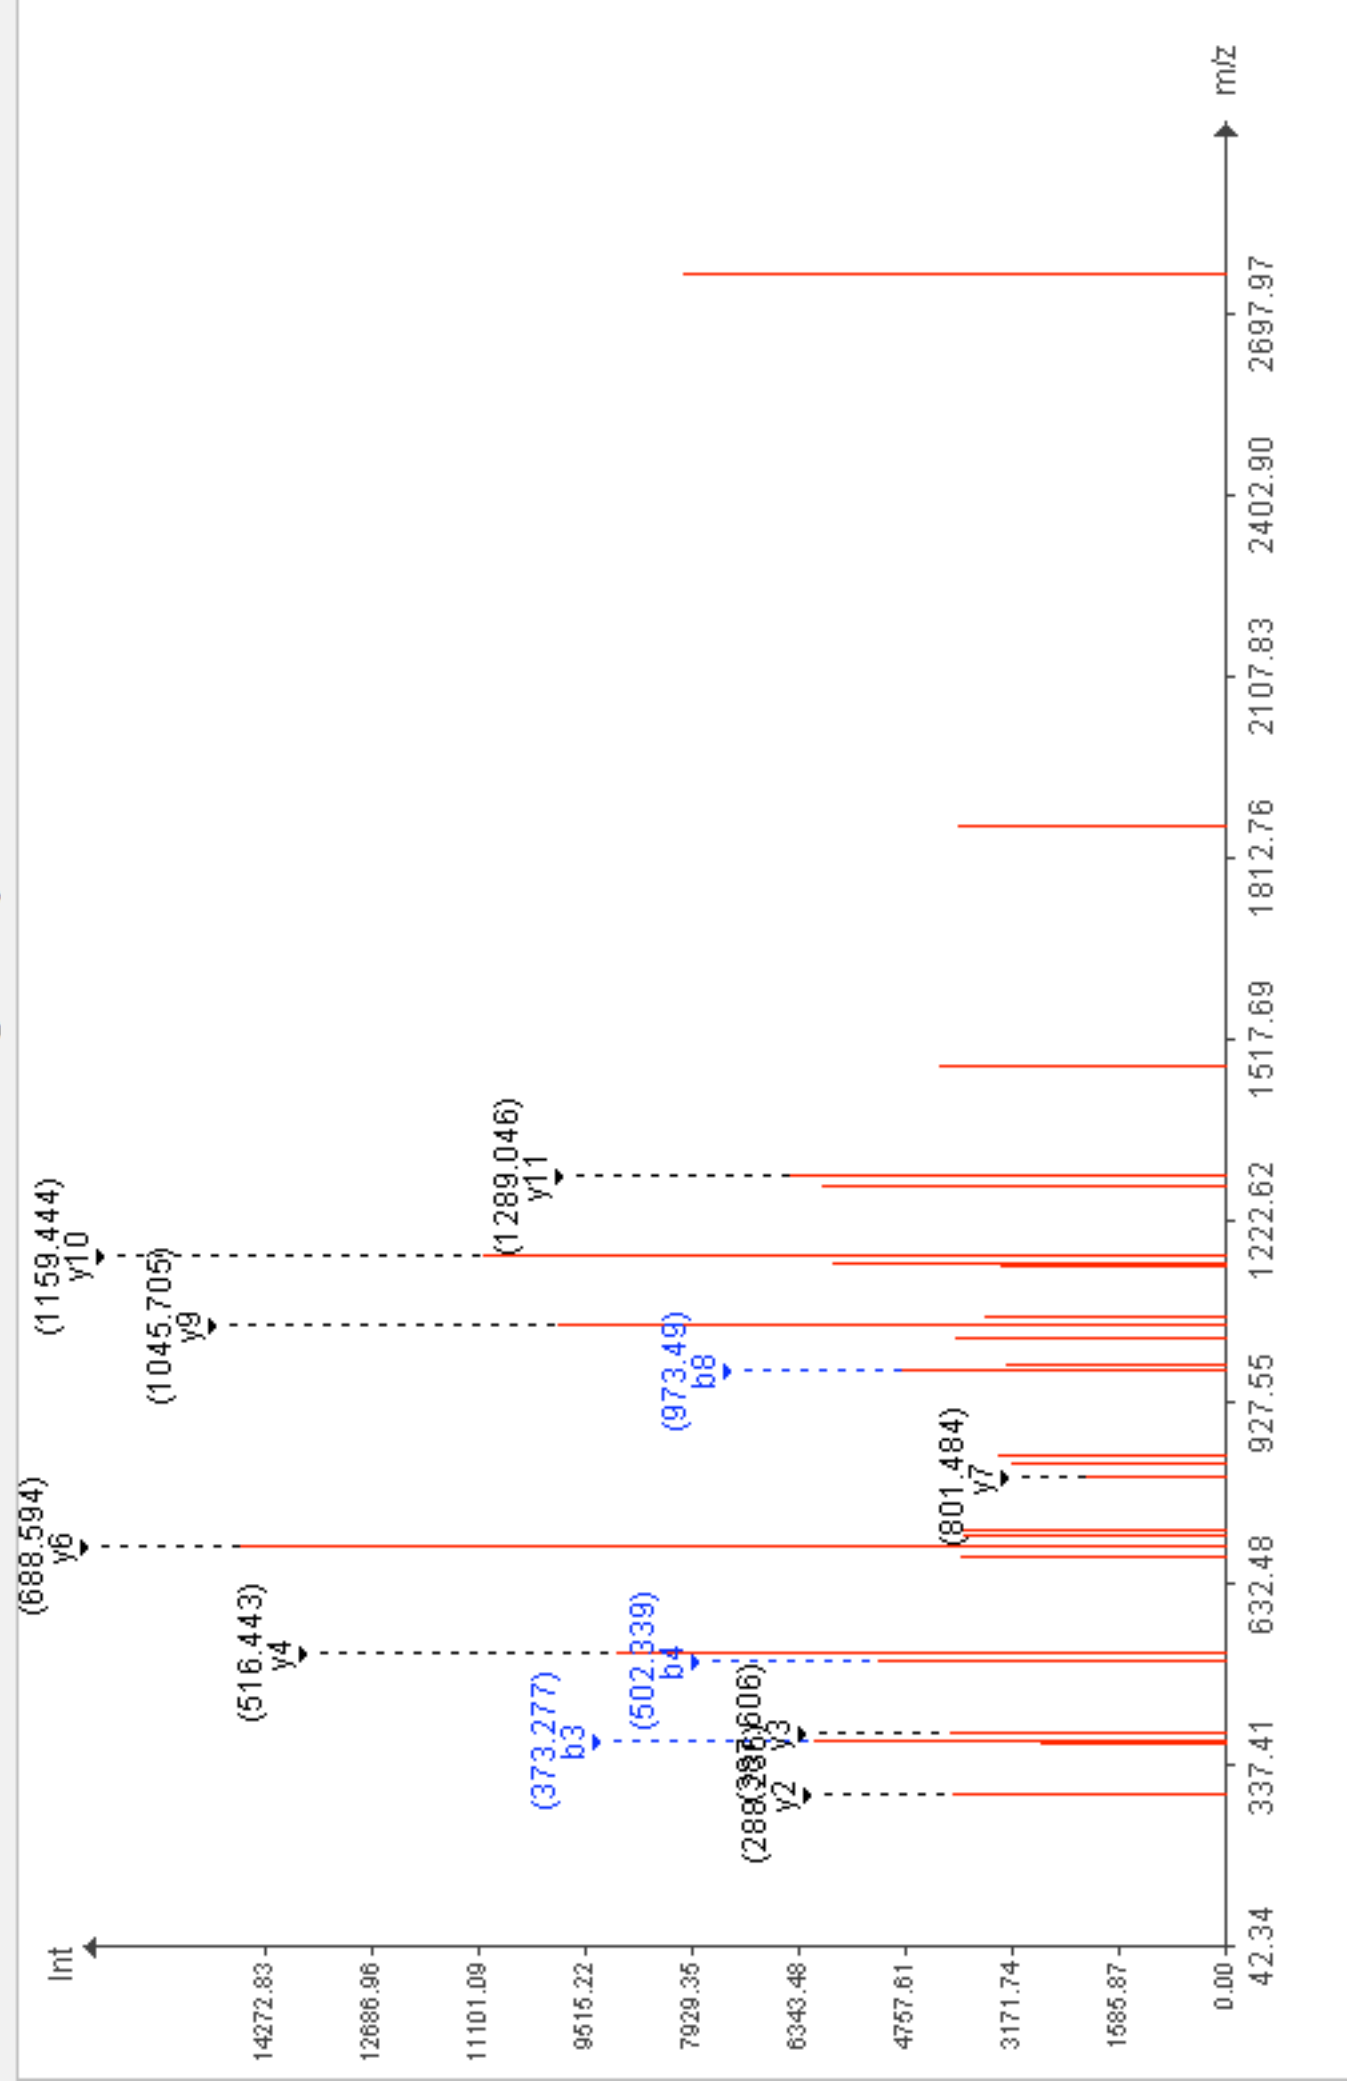

AcD3-Q(Dam)VGANDADSDDELISR-COOH

precursor mass: 875.8980 Da (charge: +2) protein: Q91WR3 (617-632)

score (threshold): 102.0 (42.0)

instrument: Agilent Esquire HCT

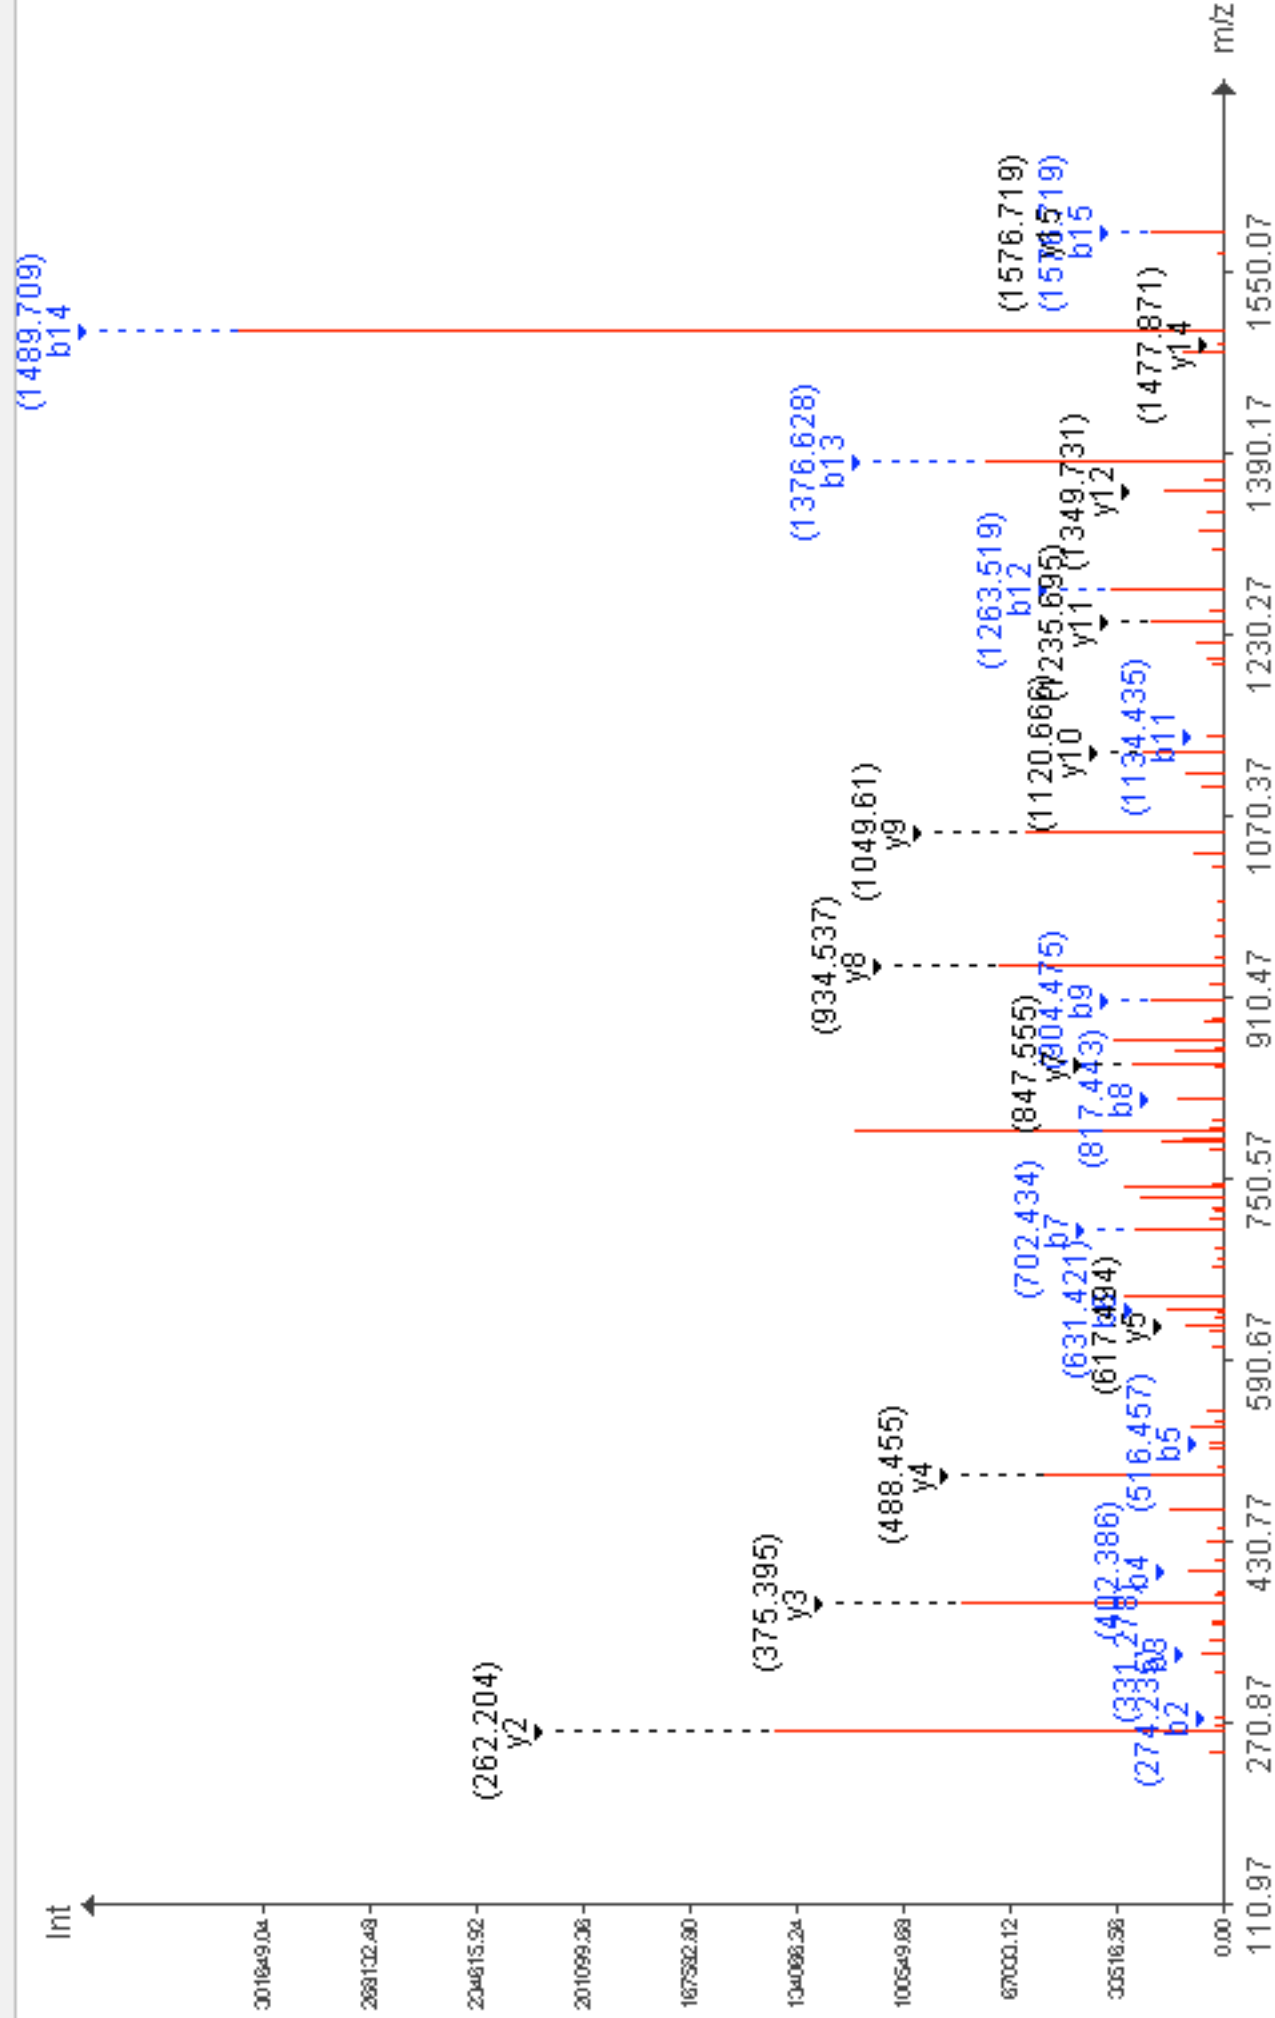

AcD3-FPAGFIEDGESPEEAALR-COOH

precursor mass: 961.4610 Da (charge: +2) protein: Q9JKX6 (93-110)

score (threshold): 50.0 (43.0)

instrument: Agilent Esquire HCT

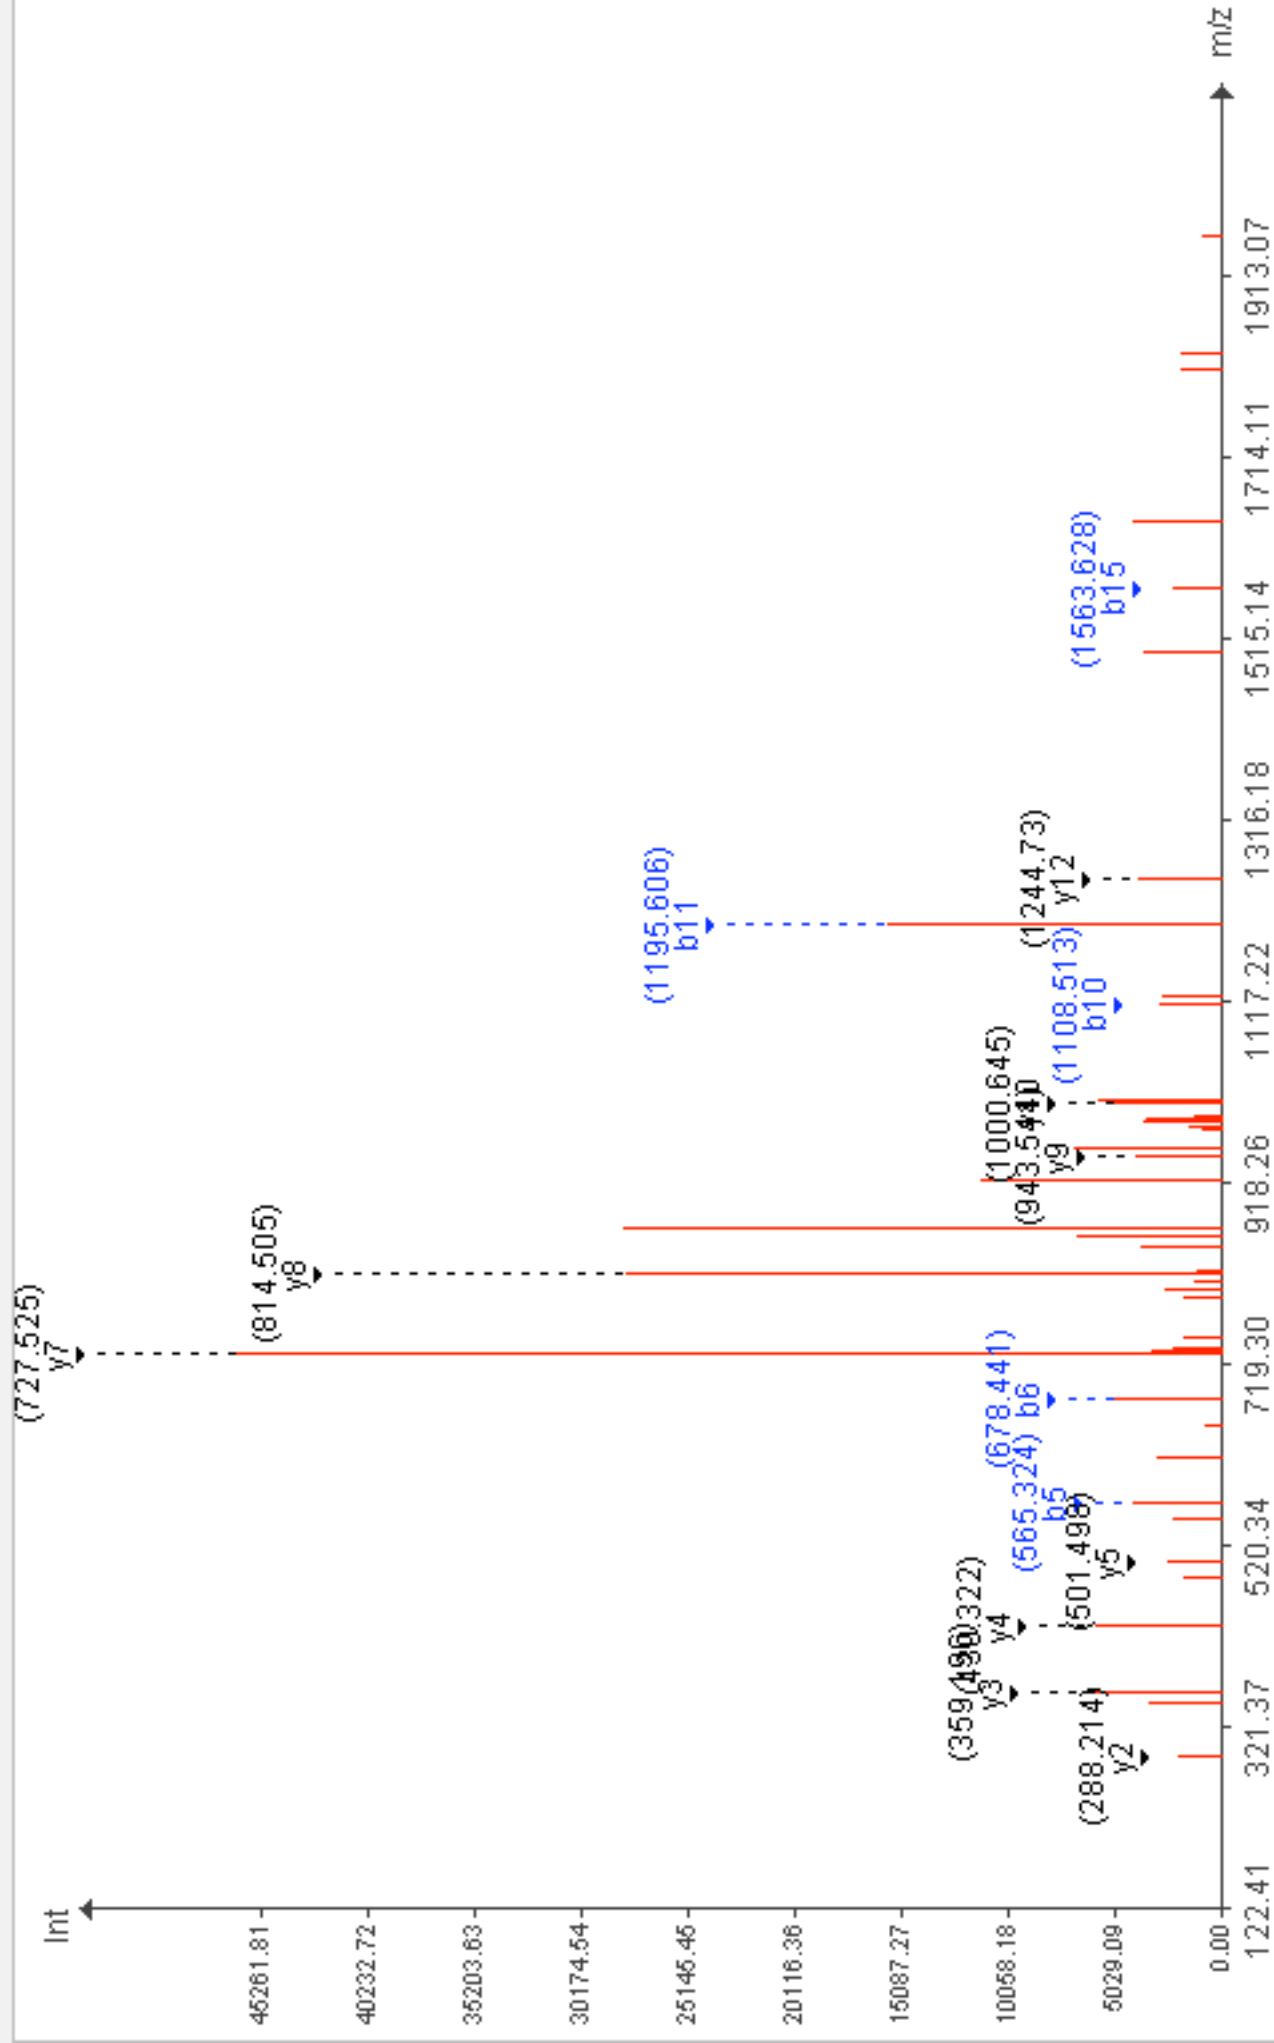



AcD3-VAPLAPGSEDNFAR-COOH

precursor mass: 744.9290 Da (charge: +2) protein: P17427 (694-707)

score (threshold): 65.0 (42.0)

instrument: Agilent Esquire HCT

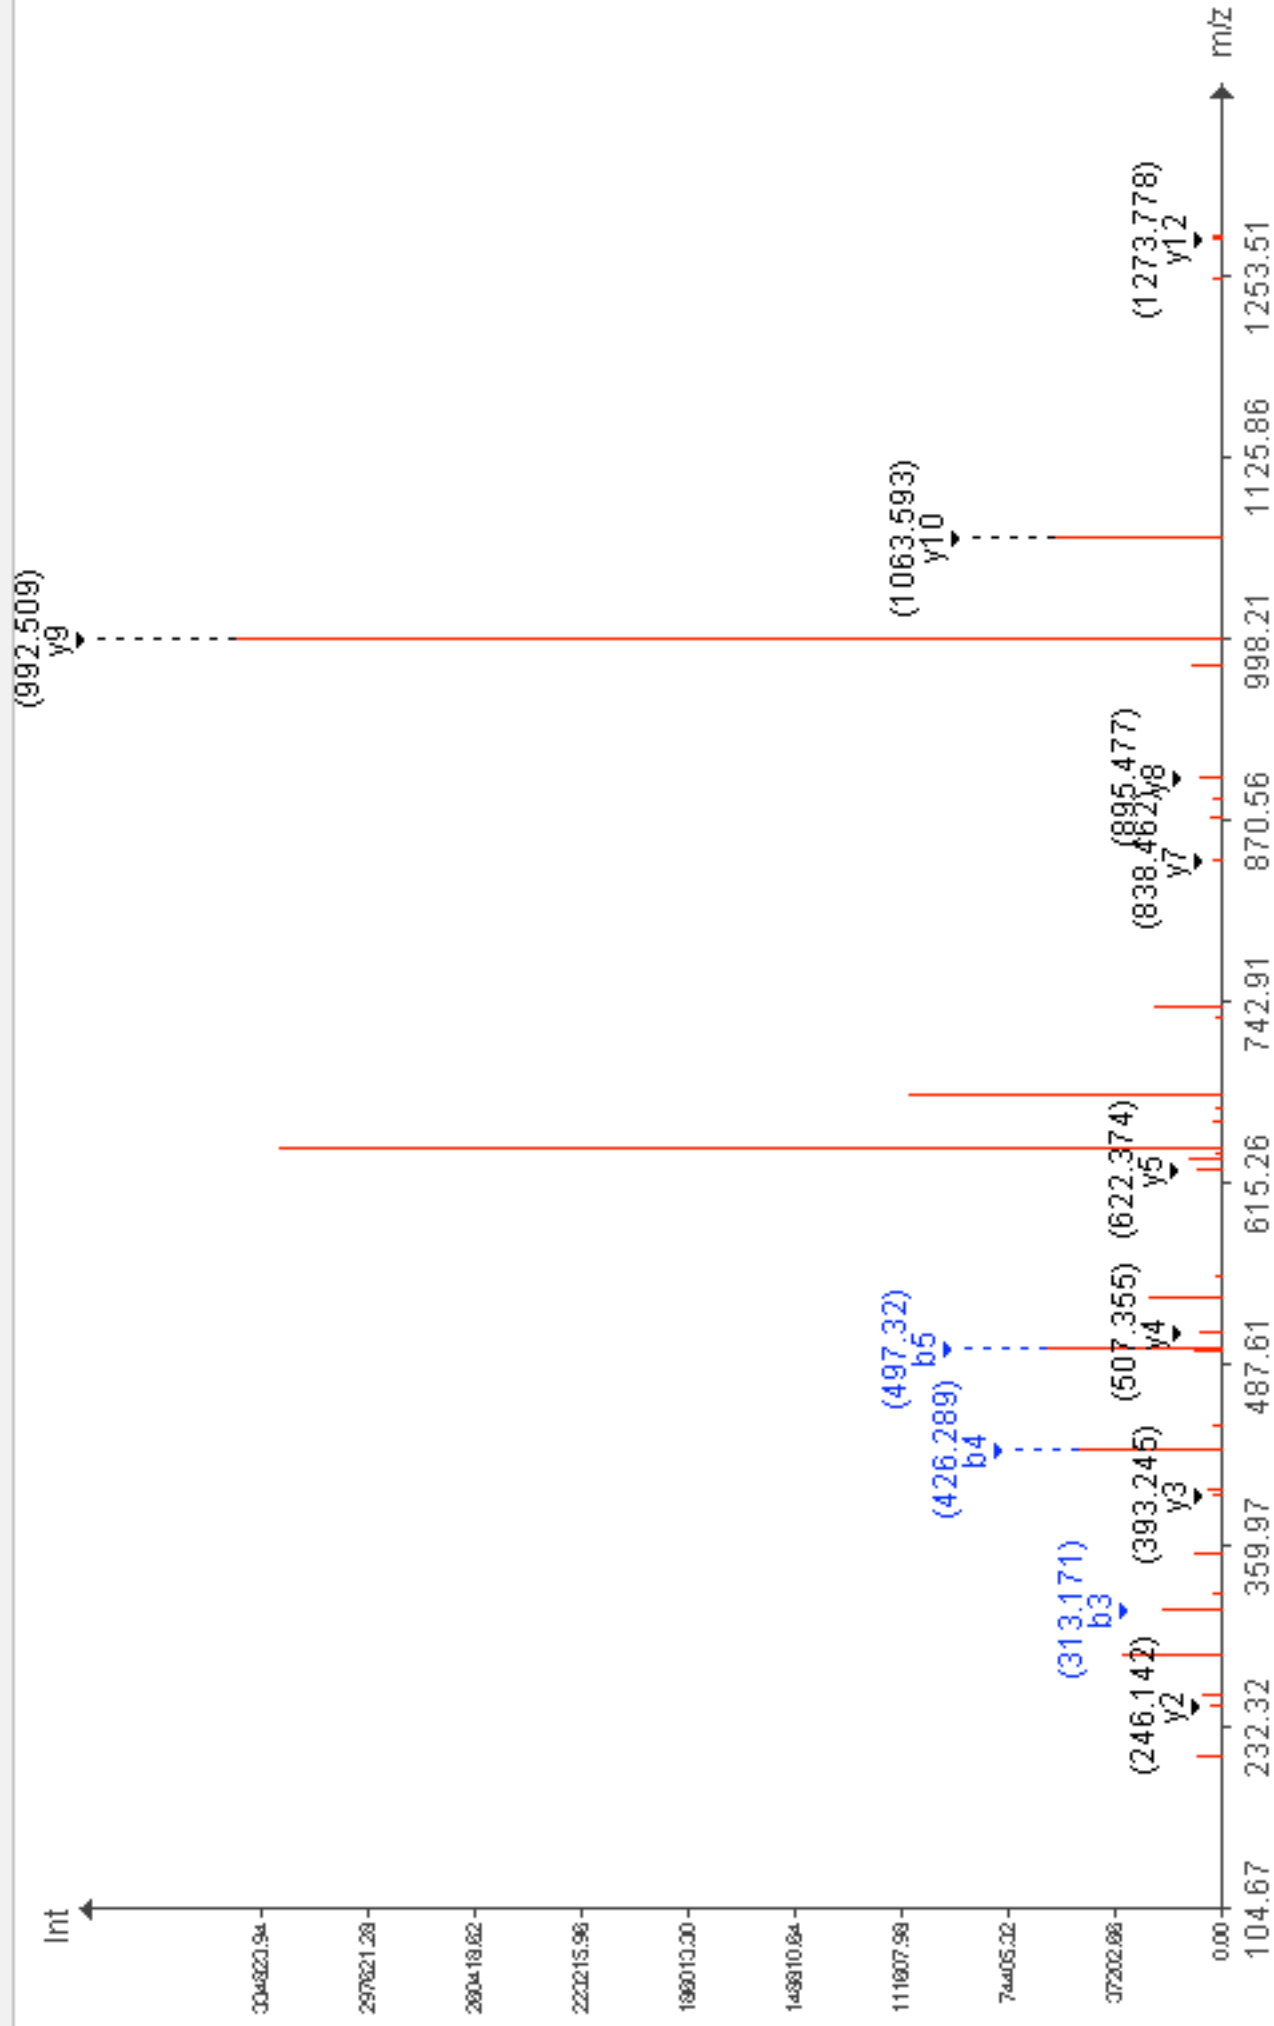

**AcD3-SVPGQQGK(AcD3K\*)YR-COOH**

**precursor mass: 605.4370 Da (charge: +2) protein: Q7TQH0 (739-748)**

**score (threshold): 48.0 (41.0)**

**instrument: Agilent Esquire HCT**

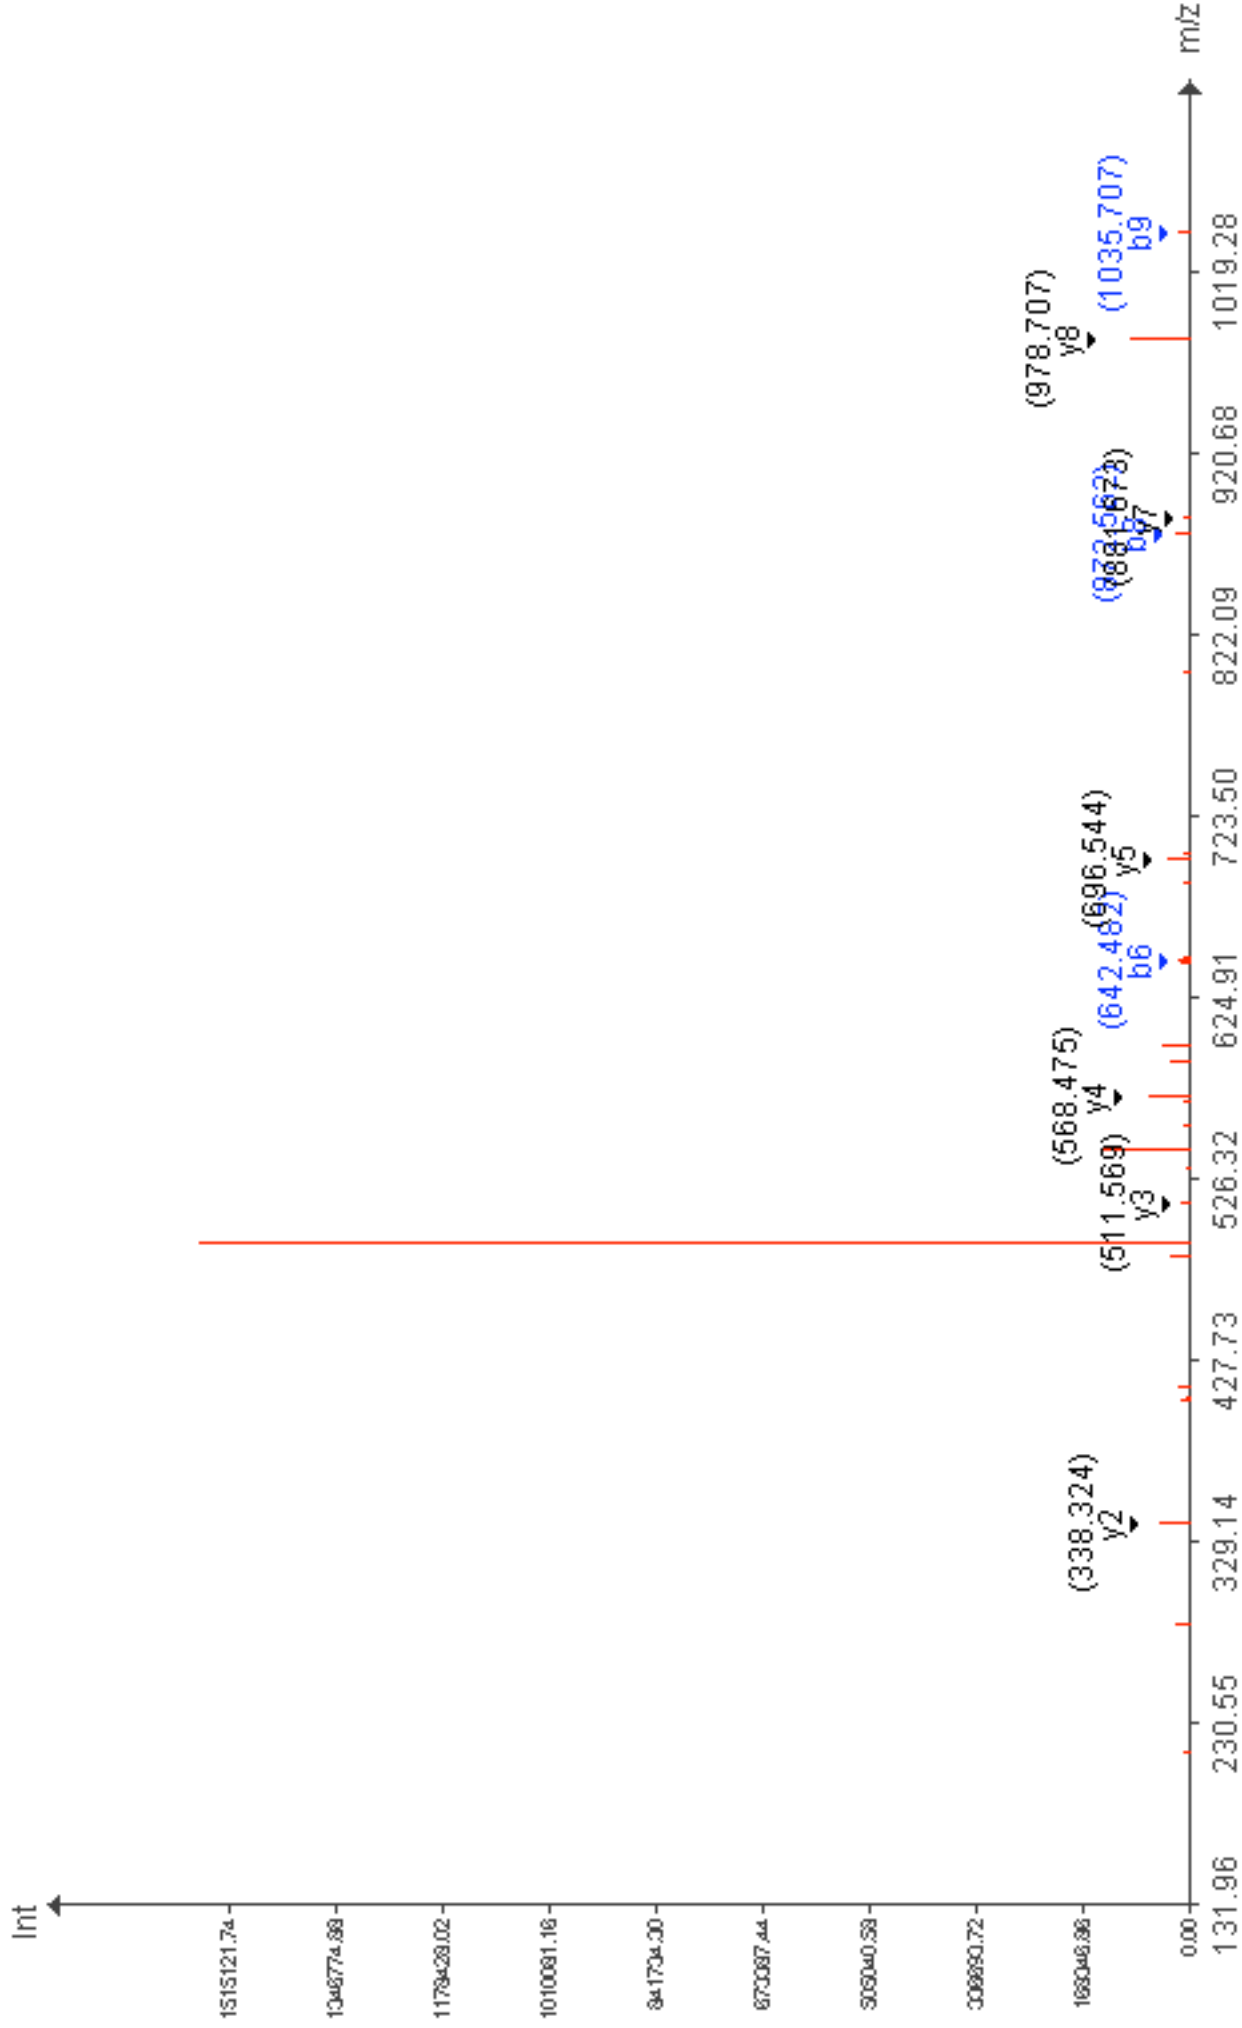

**AcD3-K(AcD3K\*)TPQIQVYSR-COOH**

precursor mass: 655.3710 Da (charge: +2) protein: P01887 (23-32)

score (threshold): 62.0 (42.0)

instrument: Agilent Esquire HCT

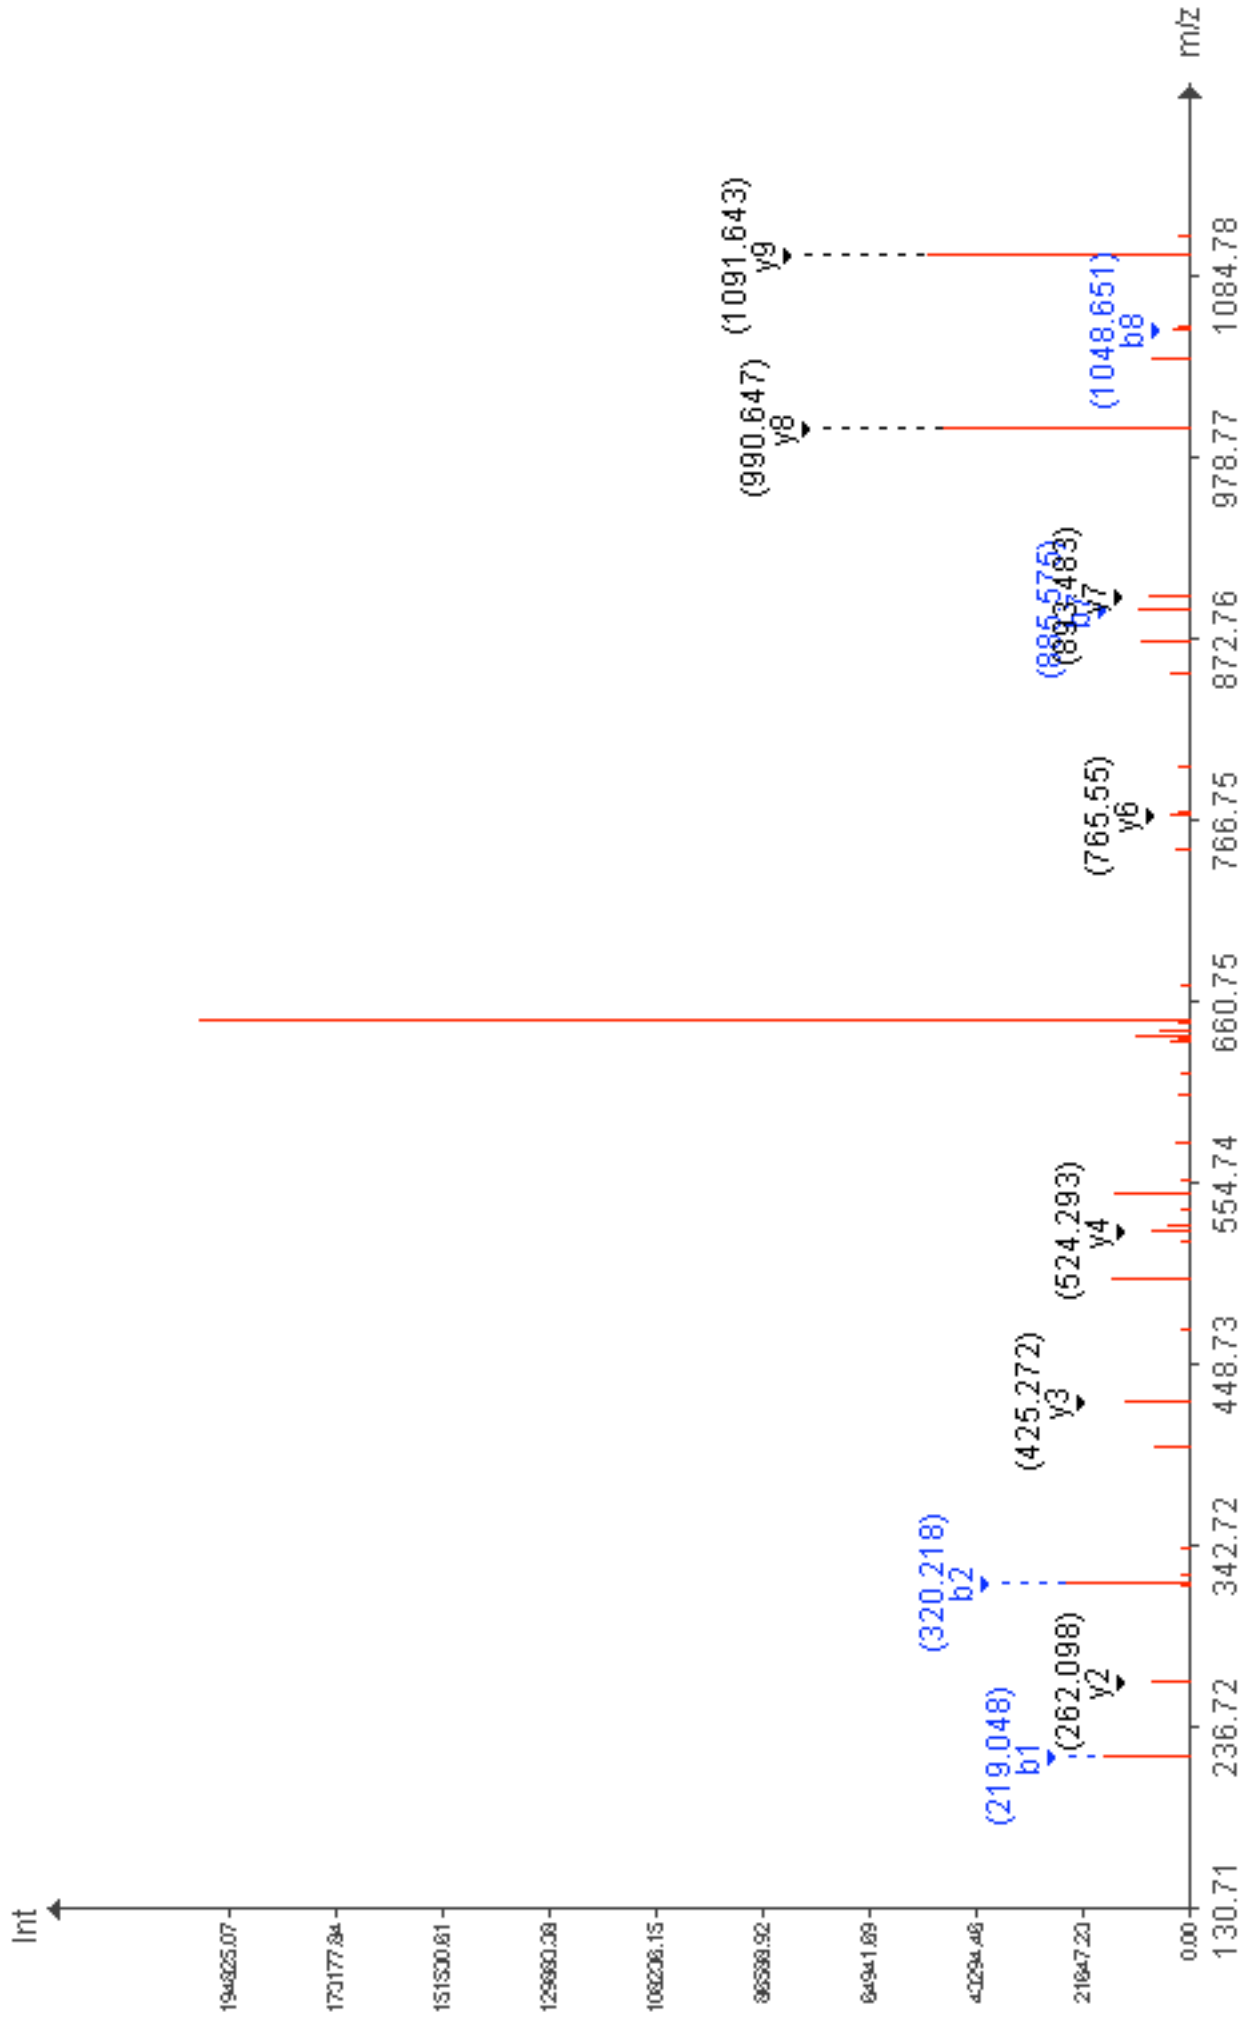

**AcD3-ATPSENLPSSAR-COOH**

precursor mass: 687.4050 Da (charge: +2) protein: Q8BTV2 (202-214)

score (threshold): 62.0 (42.0)

instrument: Agilent Esquire HCT

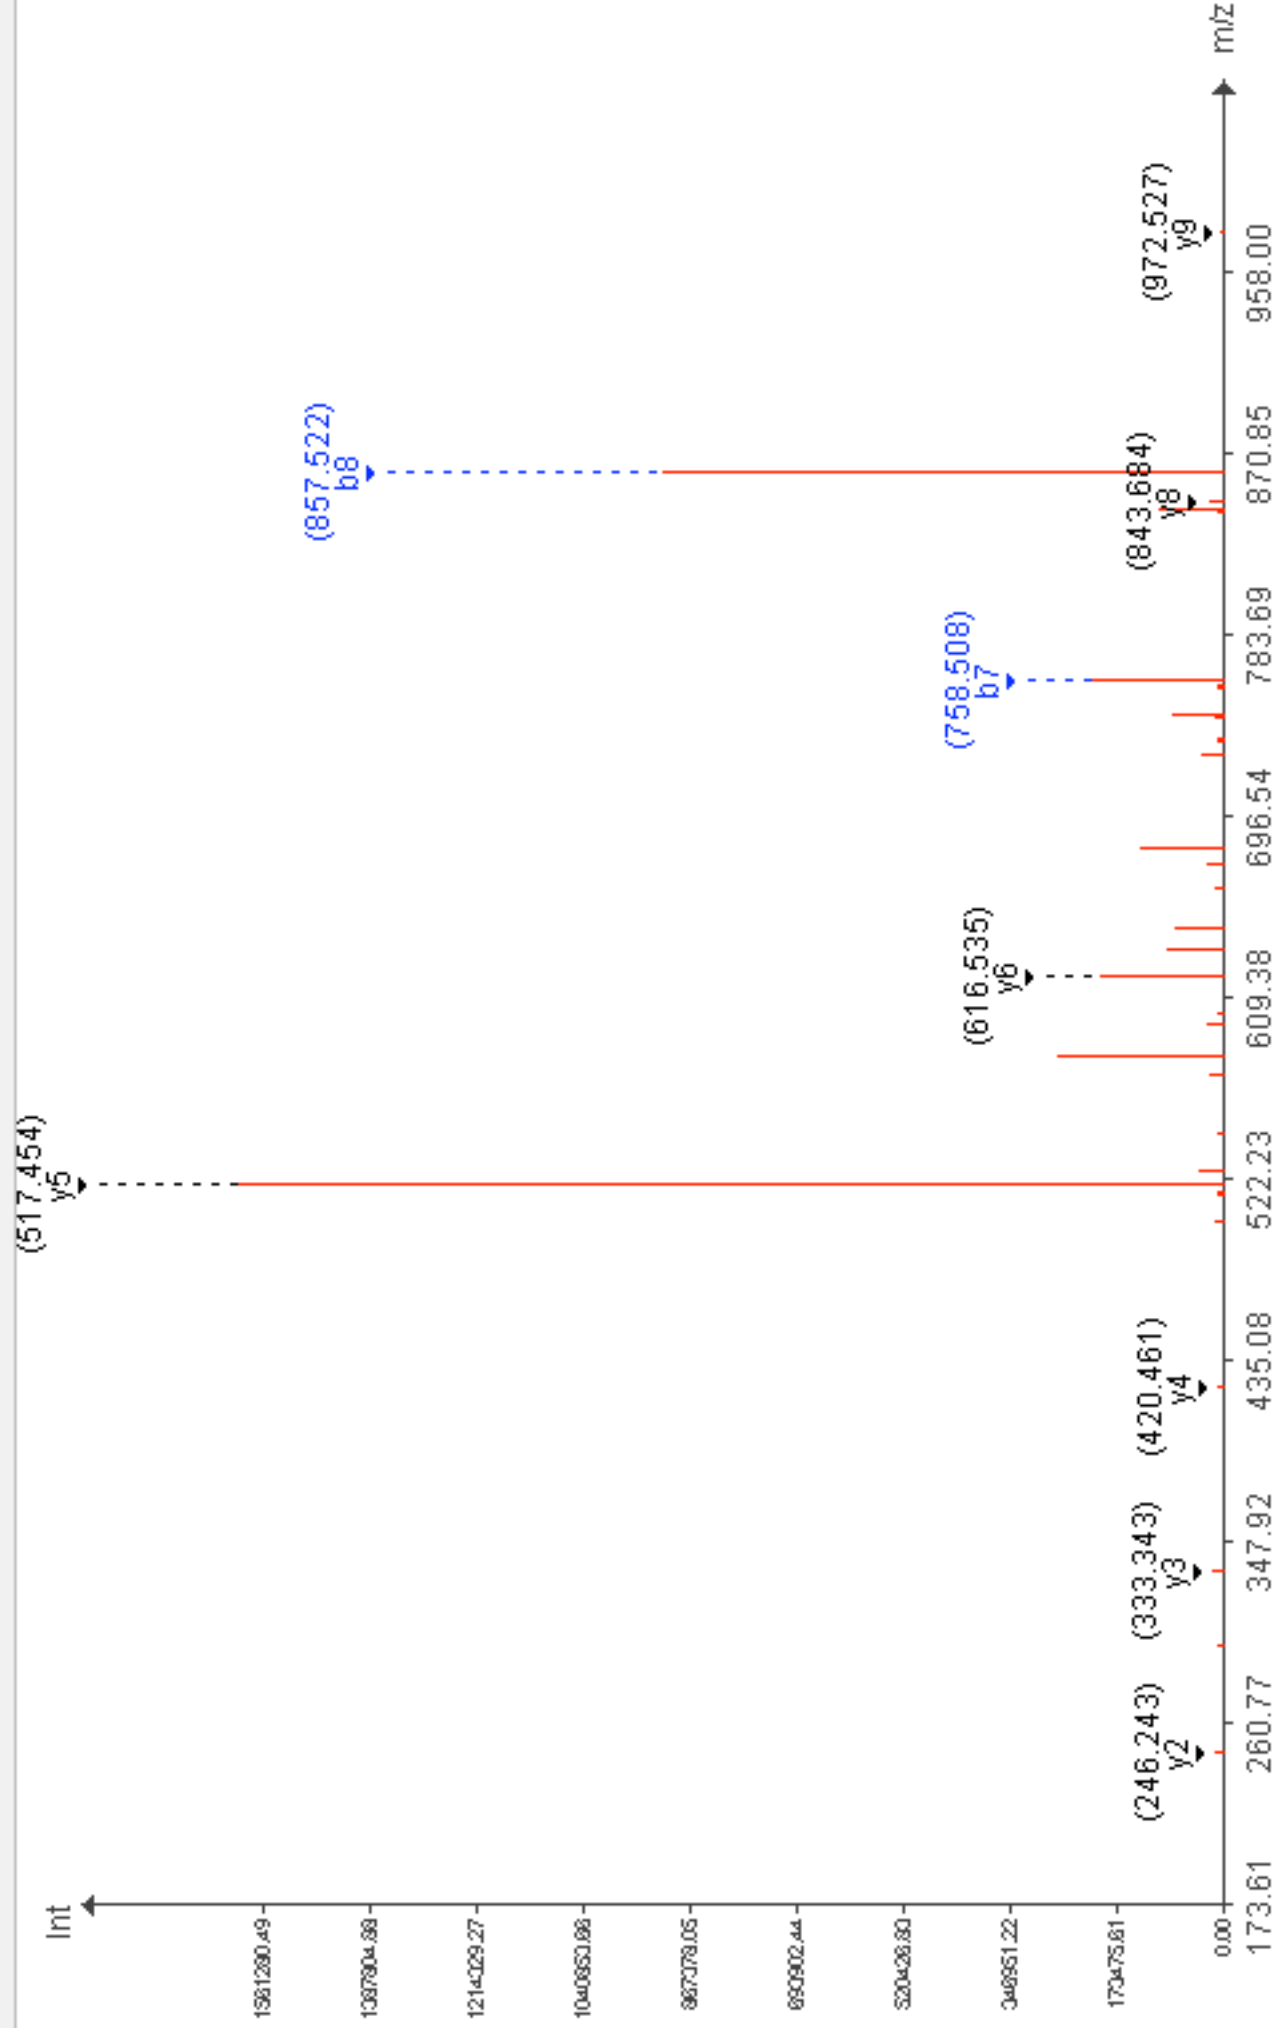

**AcD3-GLALDDEDVEELTASQR-COOH**

precursor mass: 953.4440 Da (charge: +2) protein: P97310 (94-110)

score (threshold): 50.0 (42.0)

instrument: Agilent Esquire HCT

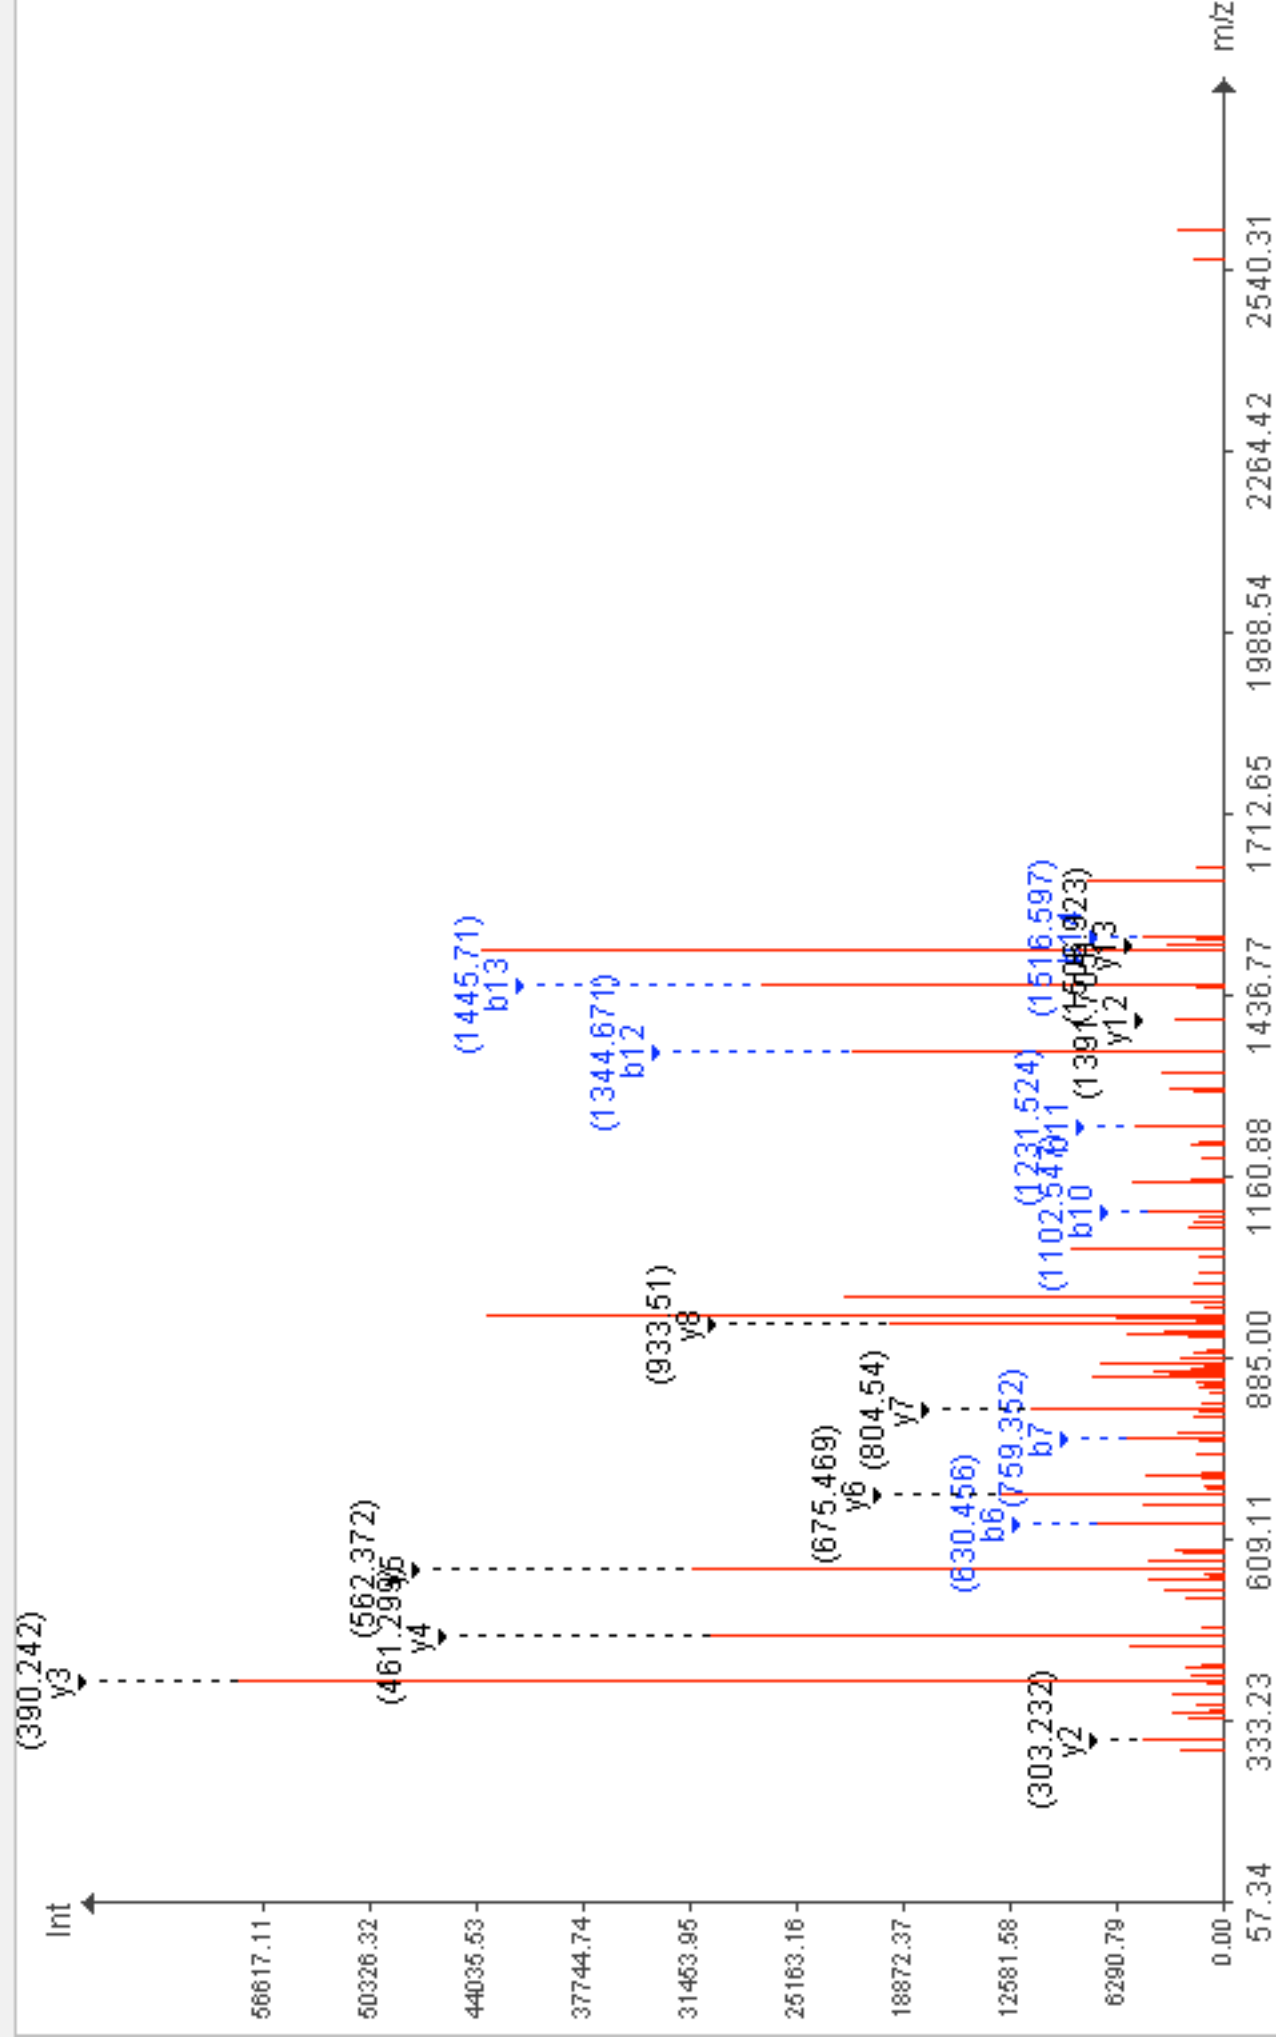

**AcD3-YEPGFV GIR-COOH**

precursor mass: 541.8310 Da (charge: +2) protein: P60898 (7-15)

score (threshold): 50.0 (45.0)

instrument: Agilent Esquire HCT

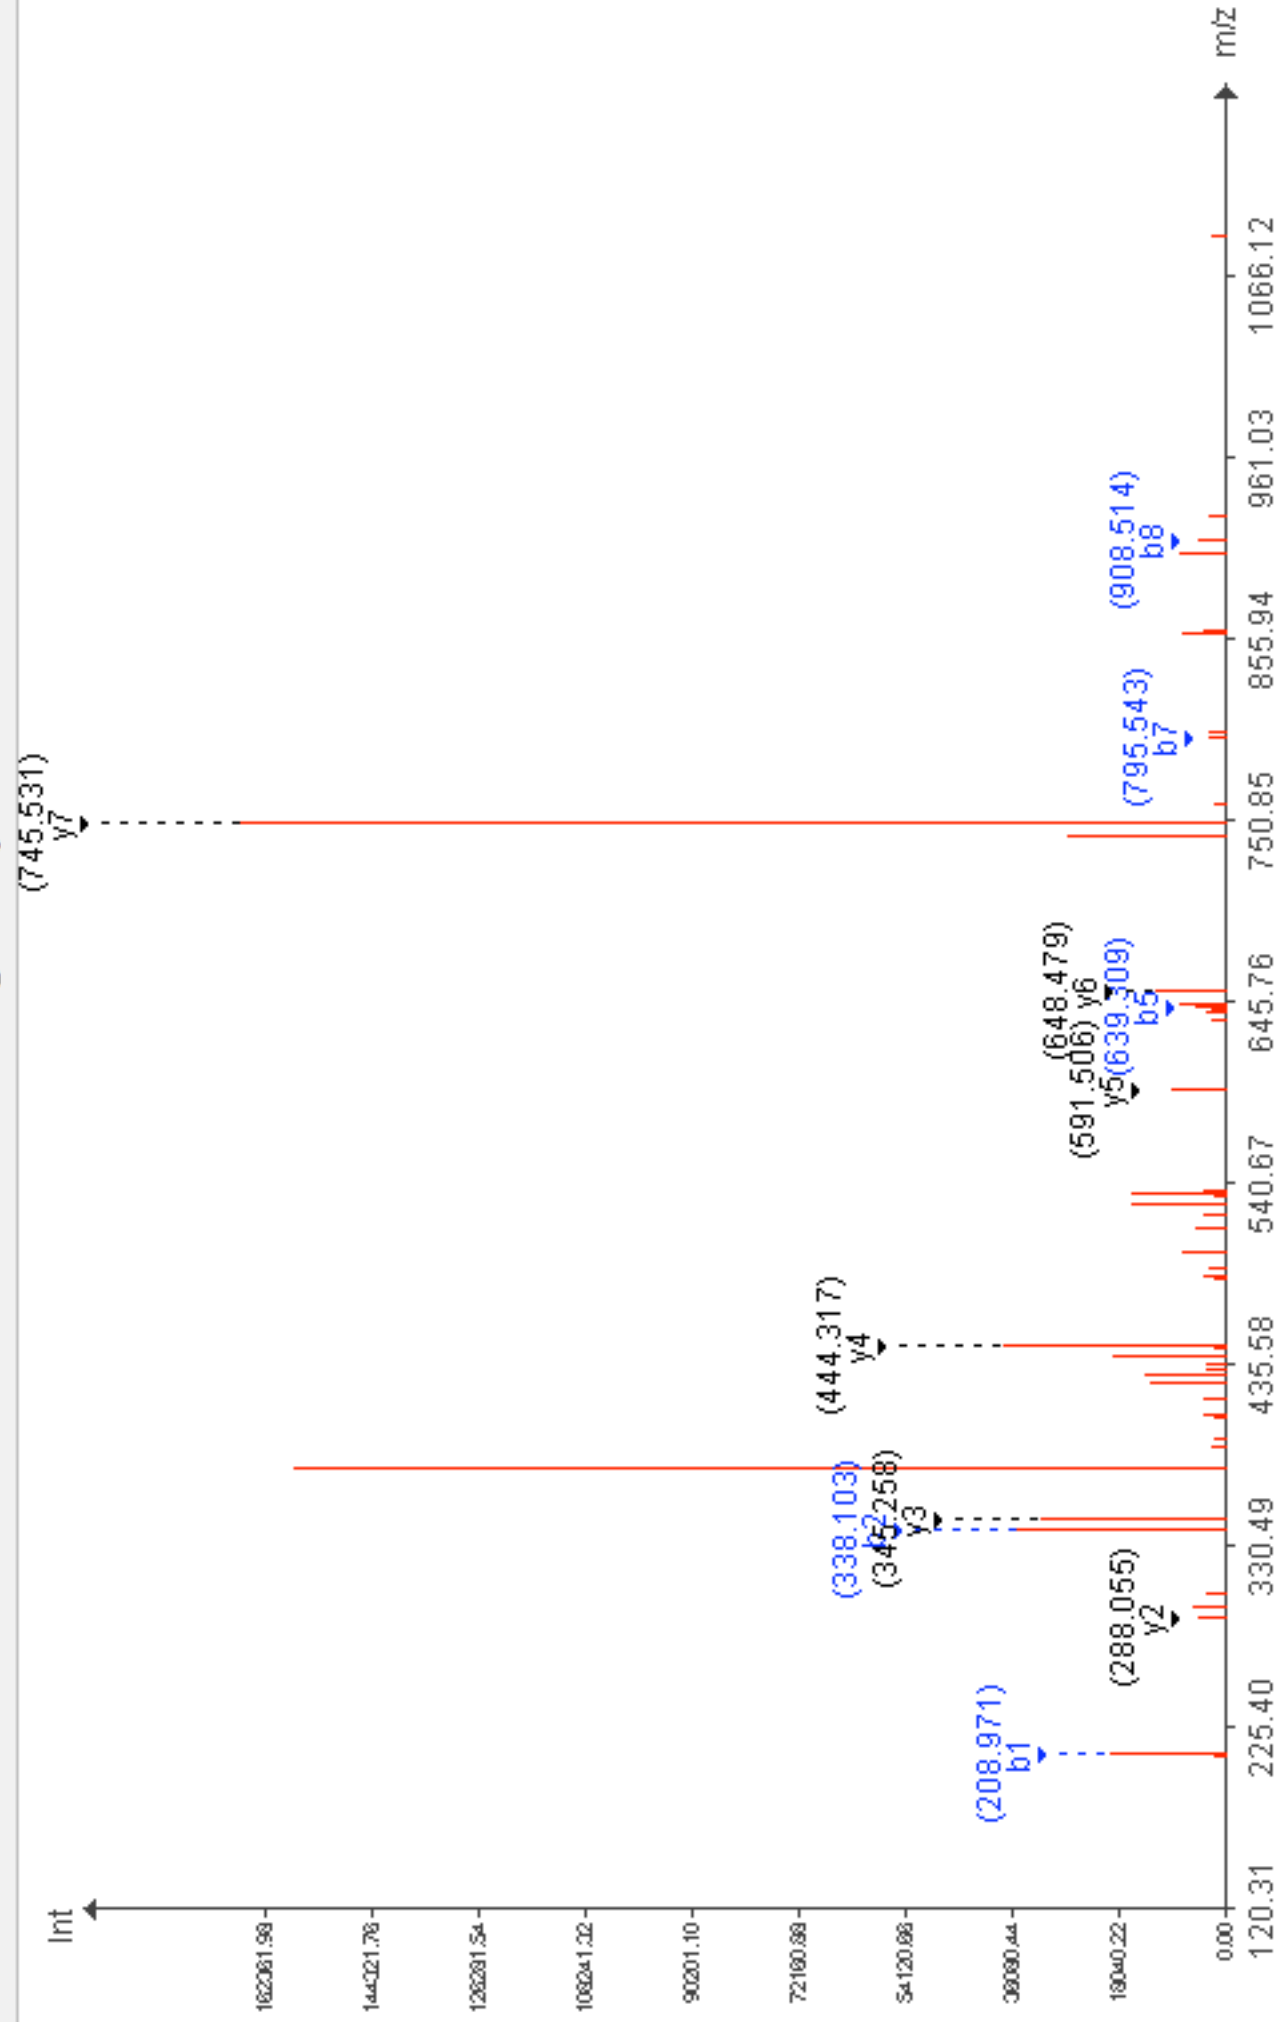

**ACD3-K(AcD3K\*)EALTYDGALLGDR-COOH**

precursor mass: 806.4840 Da (charge: +2) protein: Q9WUK2 (95-108)

score (threshold): 108.0 (42.0)

instrument: Agilent Esquire HCT

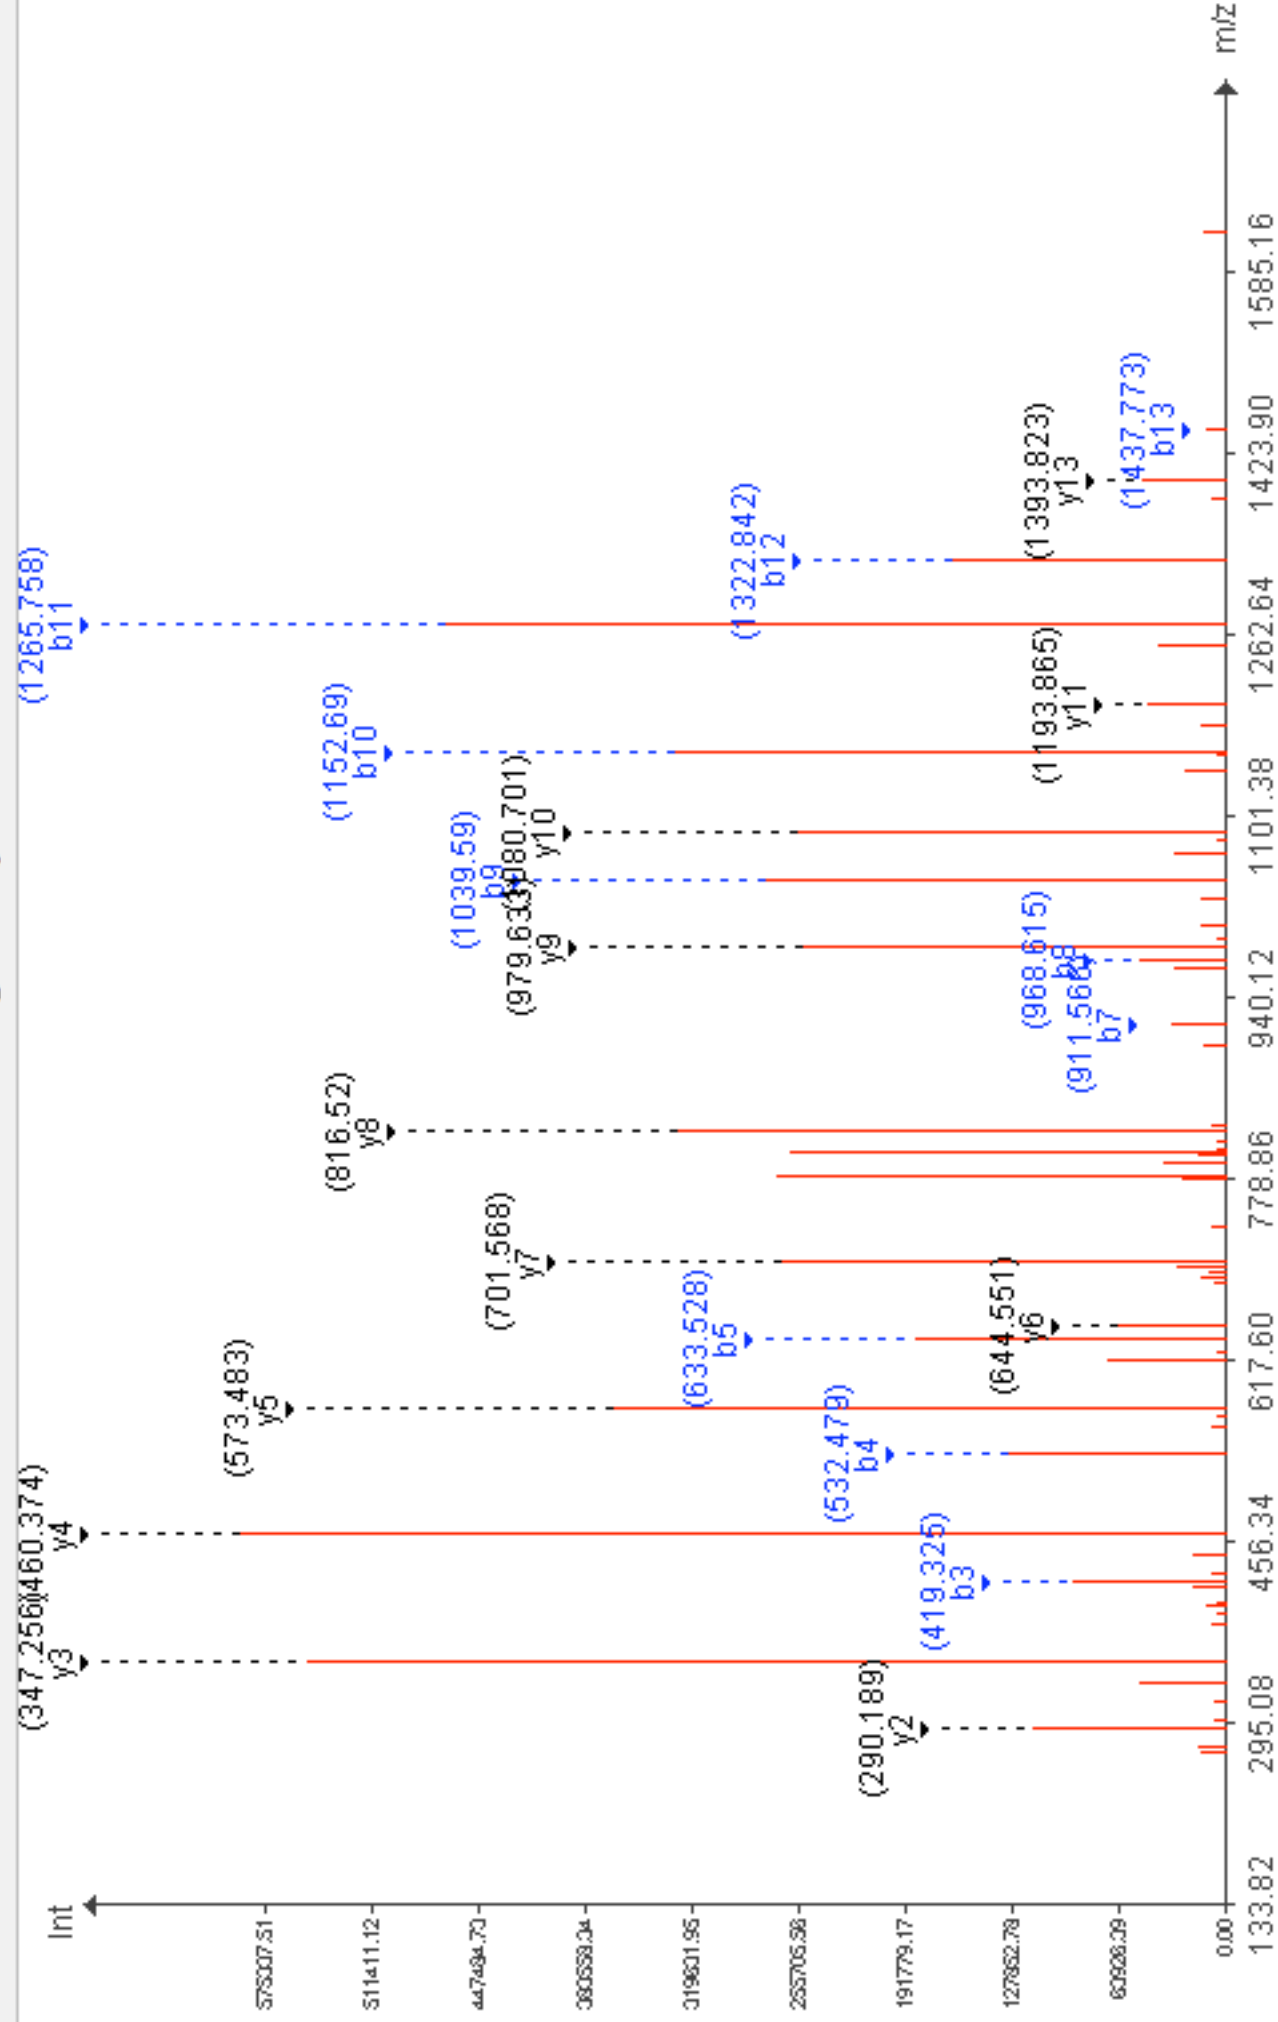

**AcD3-EFIMVER-COOH**

precursor mass: 484.8500 Da (charge: +2) protein: P97323 (40-46)

score (threshold): 36.0 (33.0)

instrument: Agilent Esquire HCT

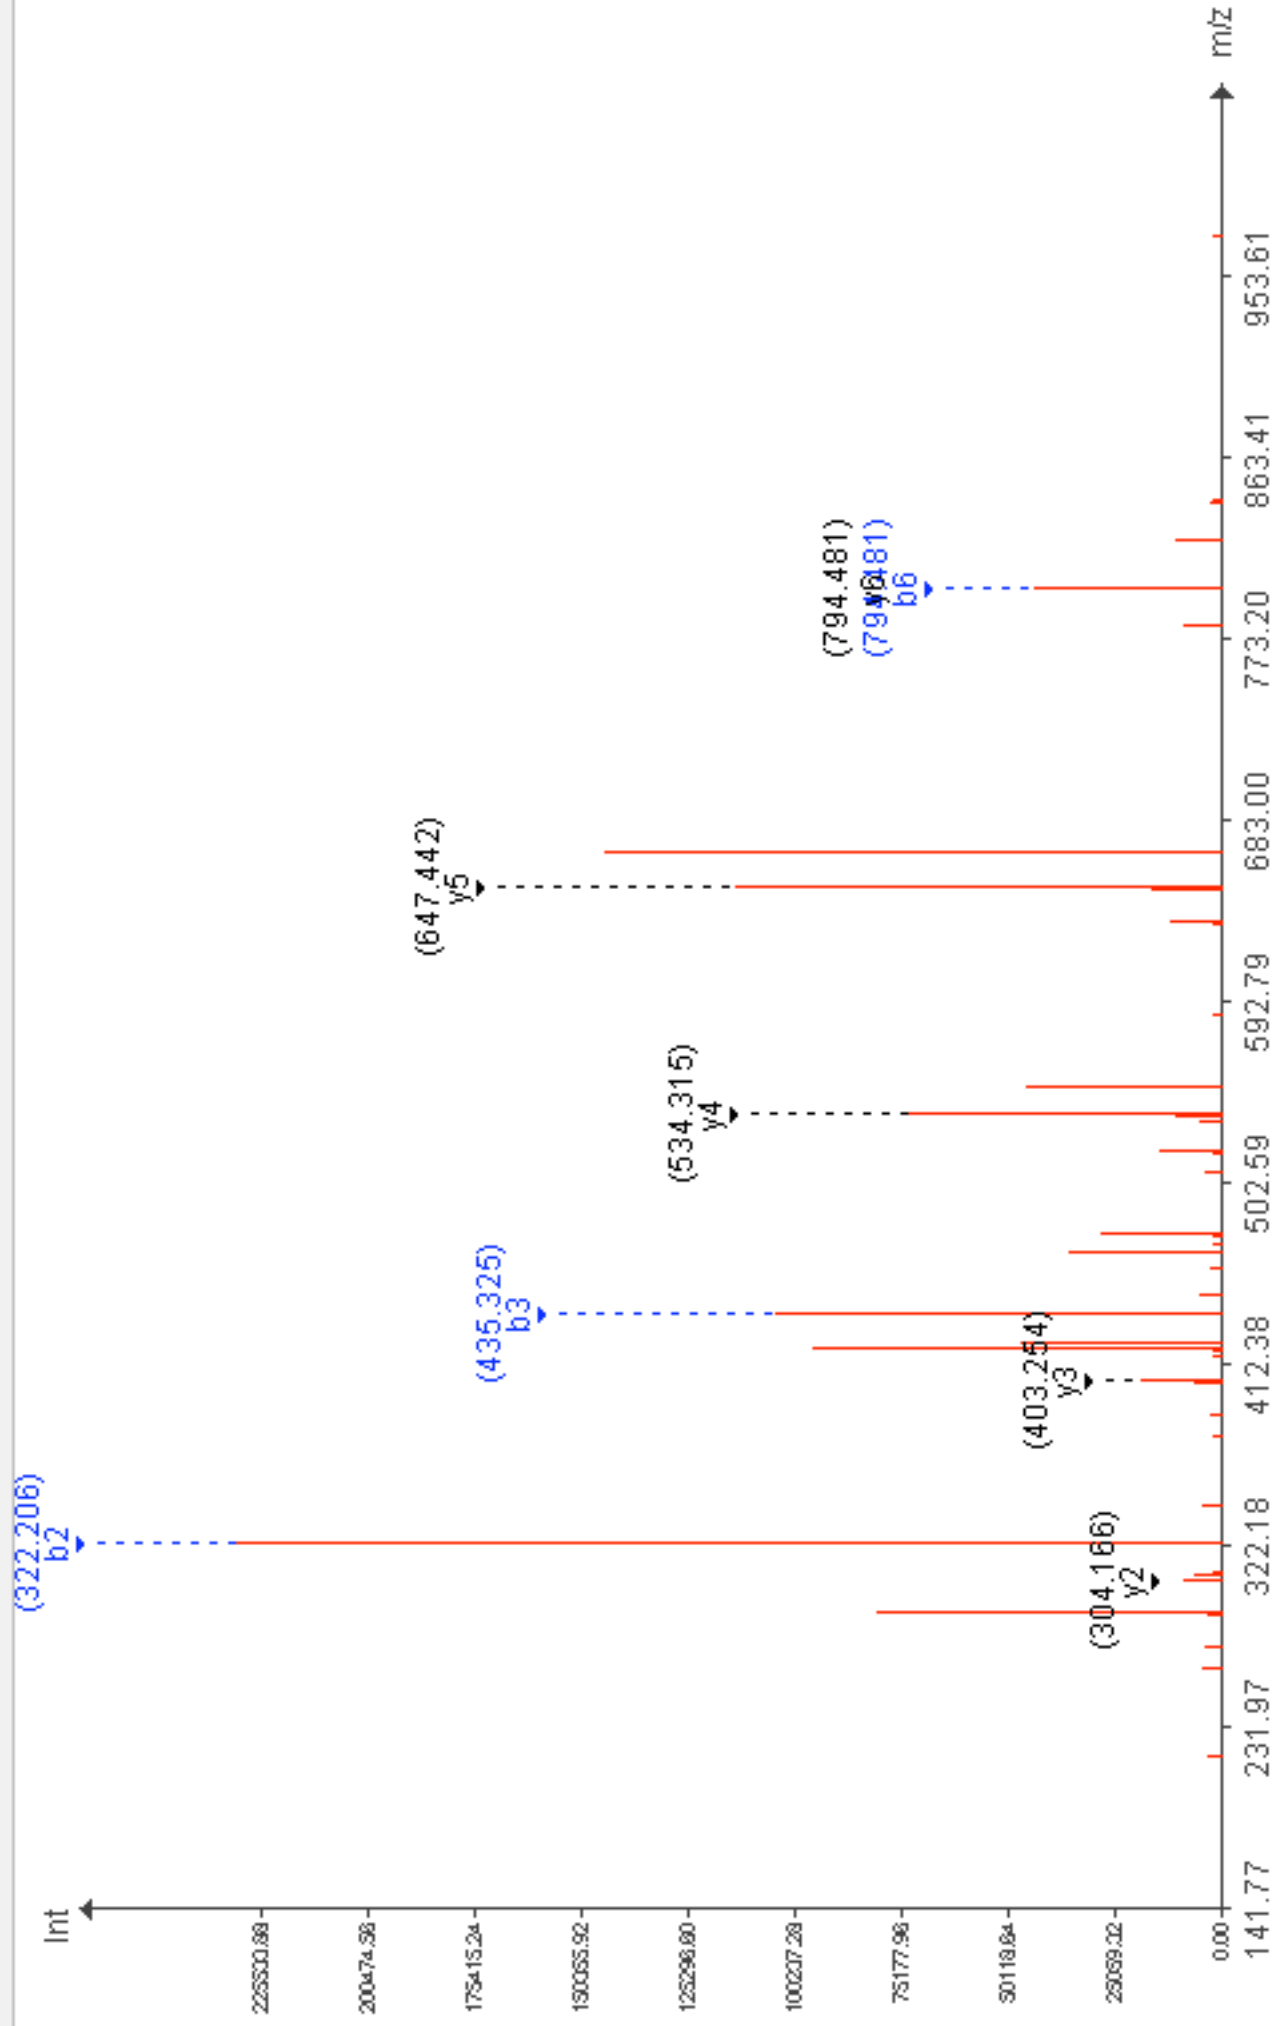



**AcD3-GFGGK(AcD3K\*)YGVVER-COOH**

precursor mass: 580.3170 Da (charge: +2) protein: P49710 (119-128)

score (threshold): 71.0 (41.0)

instrument: Agilent Esquire HCT

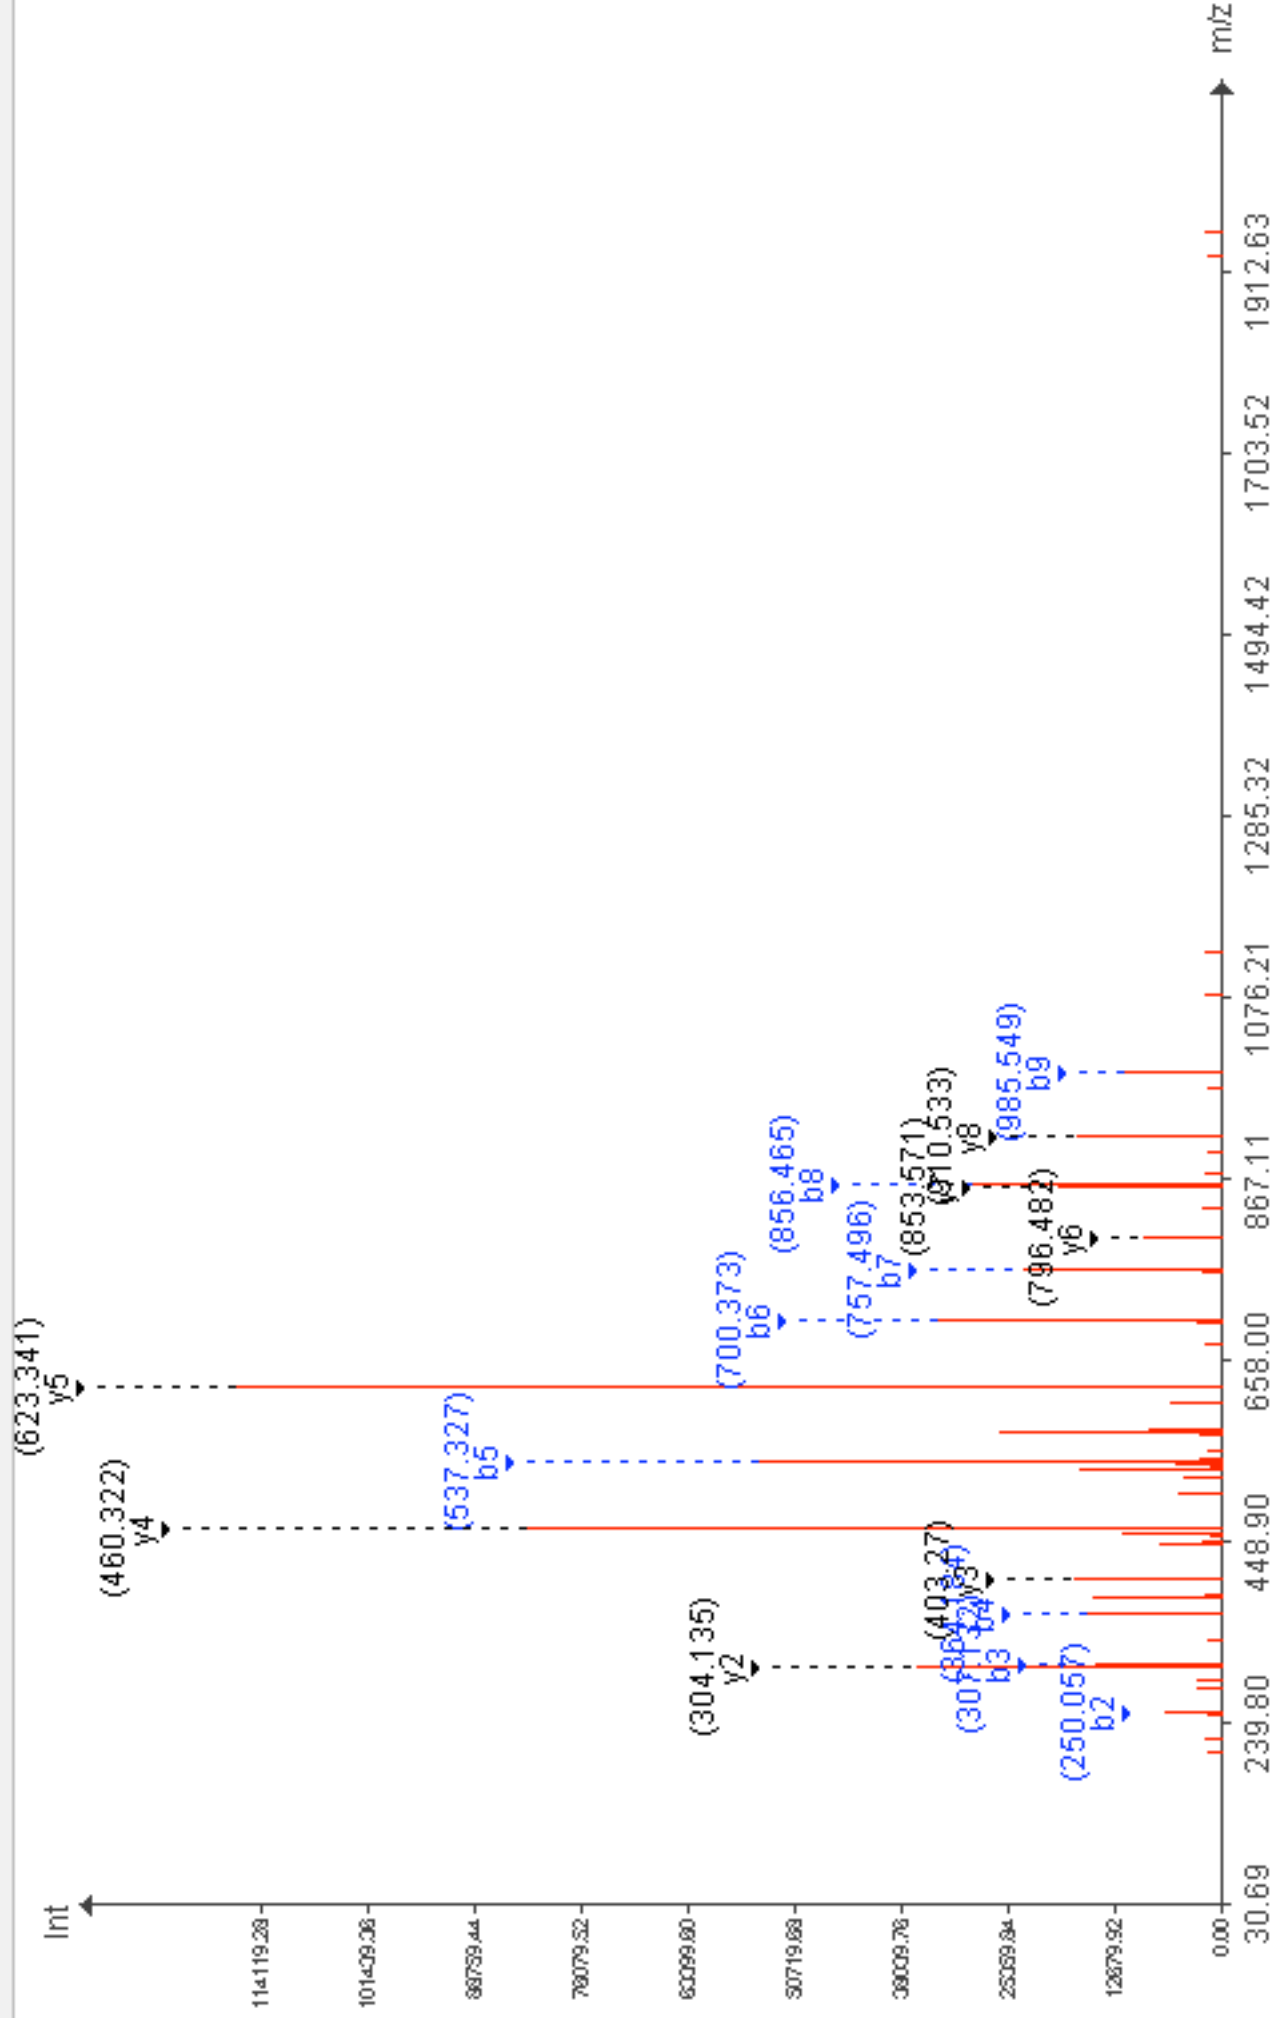

ACD3-GPPAEEEEEEAAK(AcD3K\*)EEEAQGVK-COOH

precursor mass: 877.7140 Da (charge: +3) protein: P51859 (209-232)

score (threshold): 51.0 (43.0)

instrument: Agilent Esquire HCT

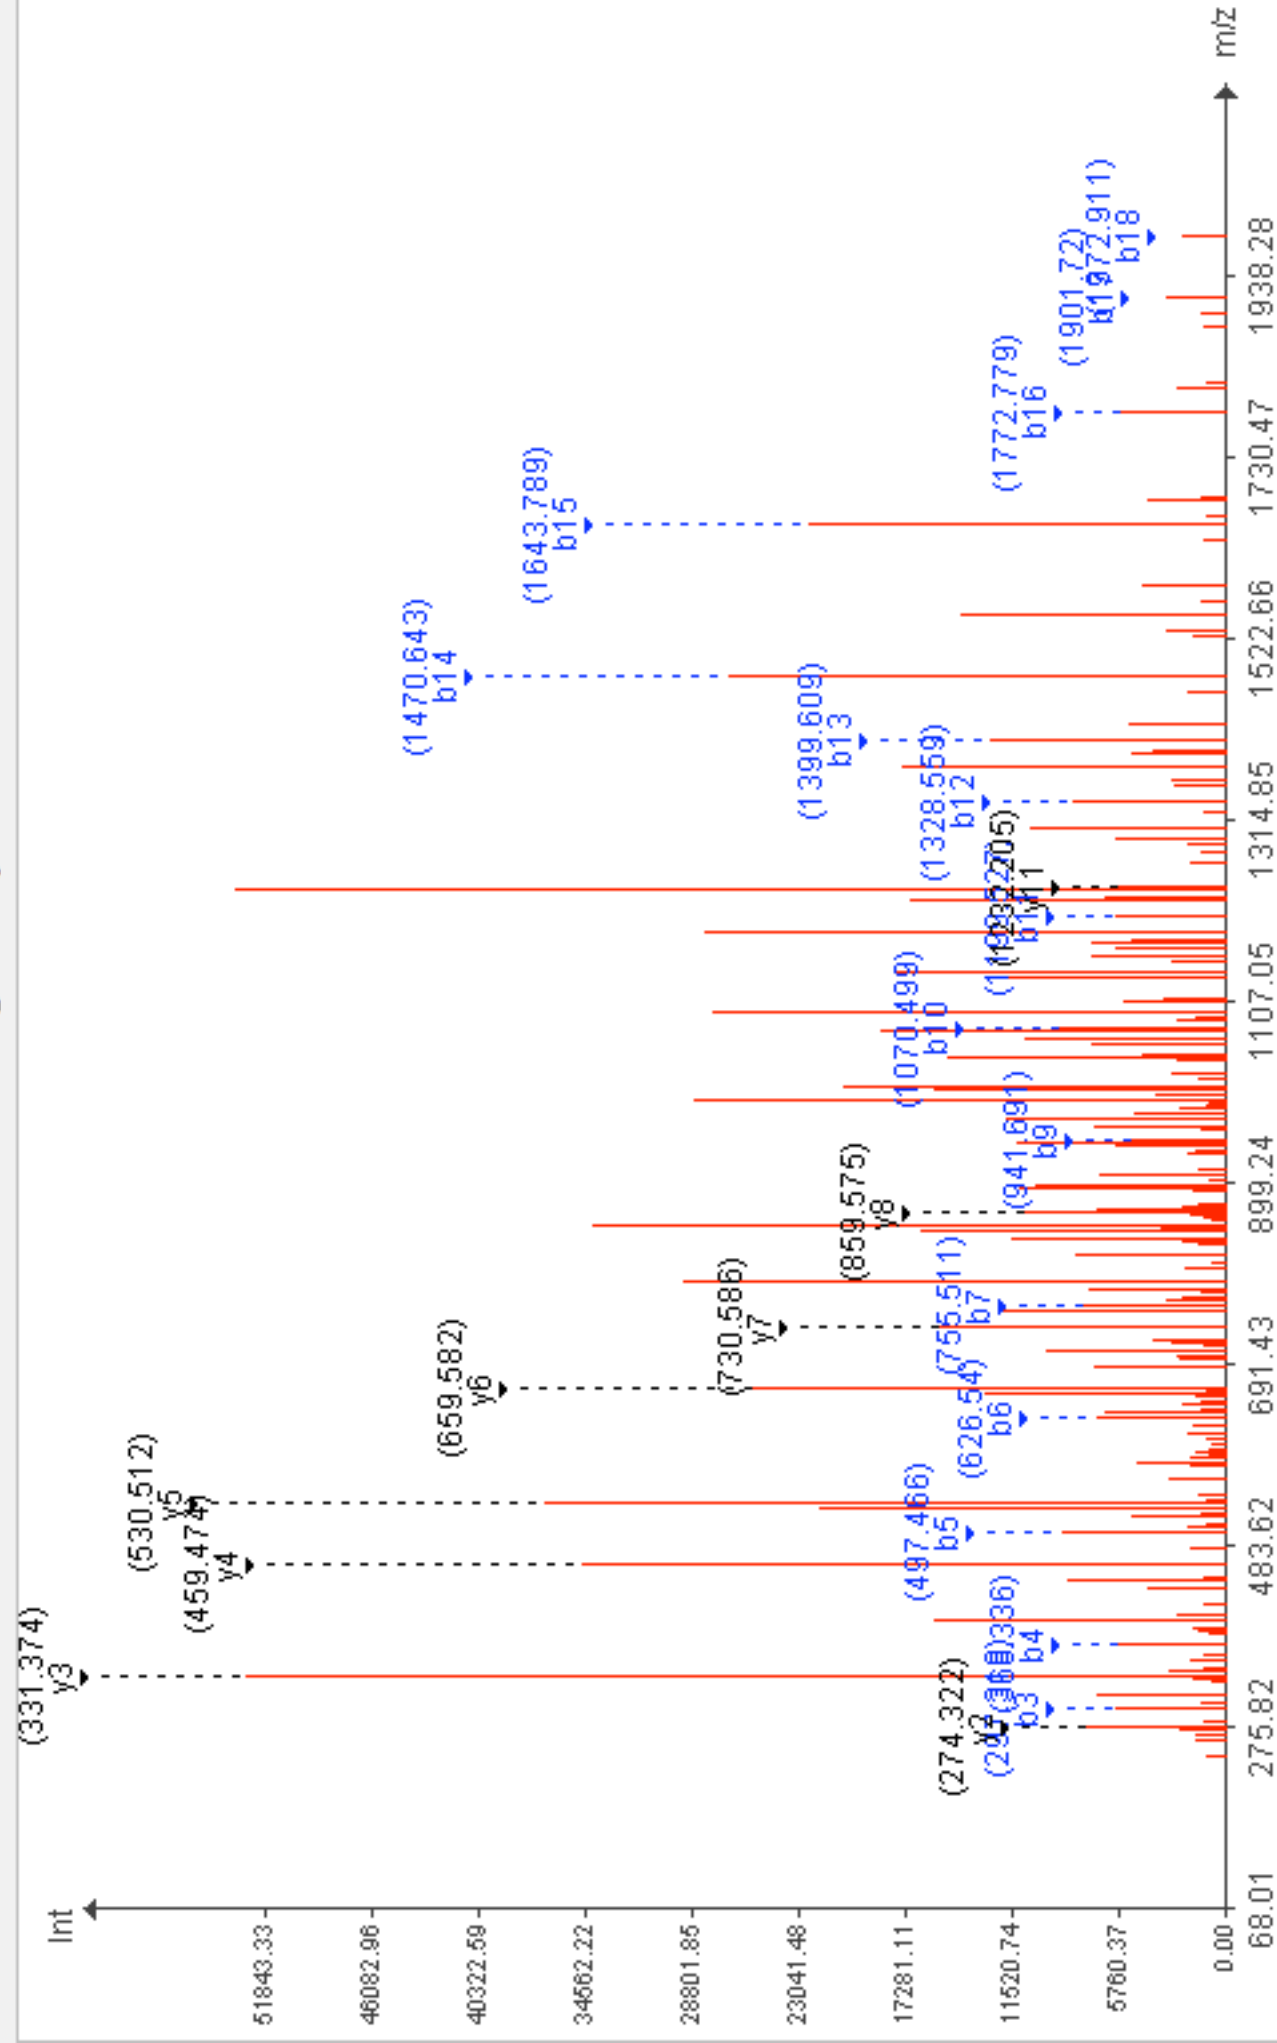

AcD3-GEEPFYTGQR-COOH

precursor mass: 643.3460 Da (charge: +2) protein: Q02780 (312-322)

score (threshold): 52.0 (41.0)

instrument: Agilent Esquire HCT

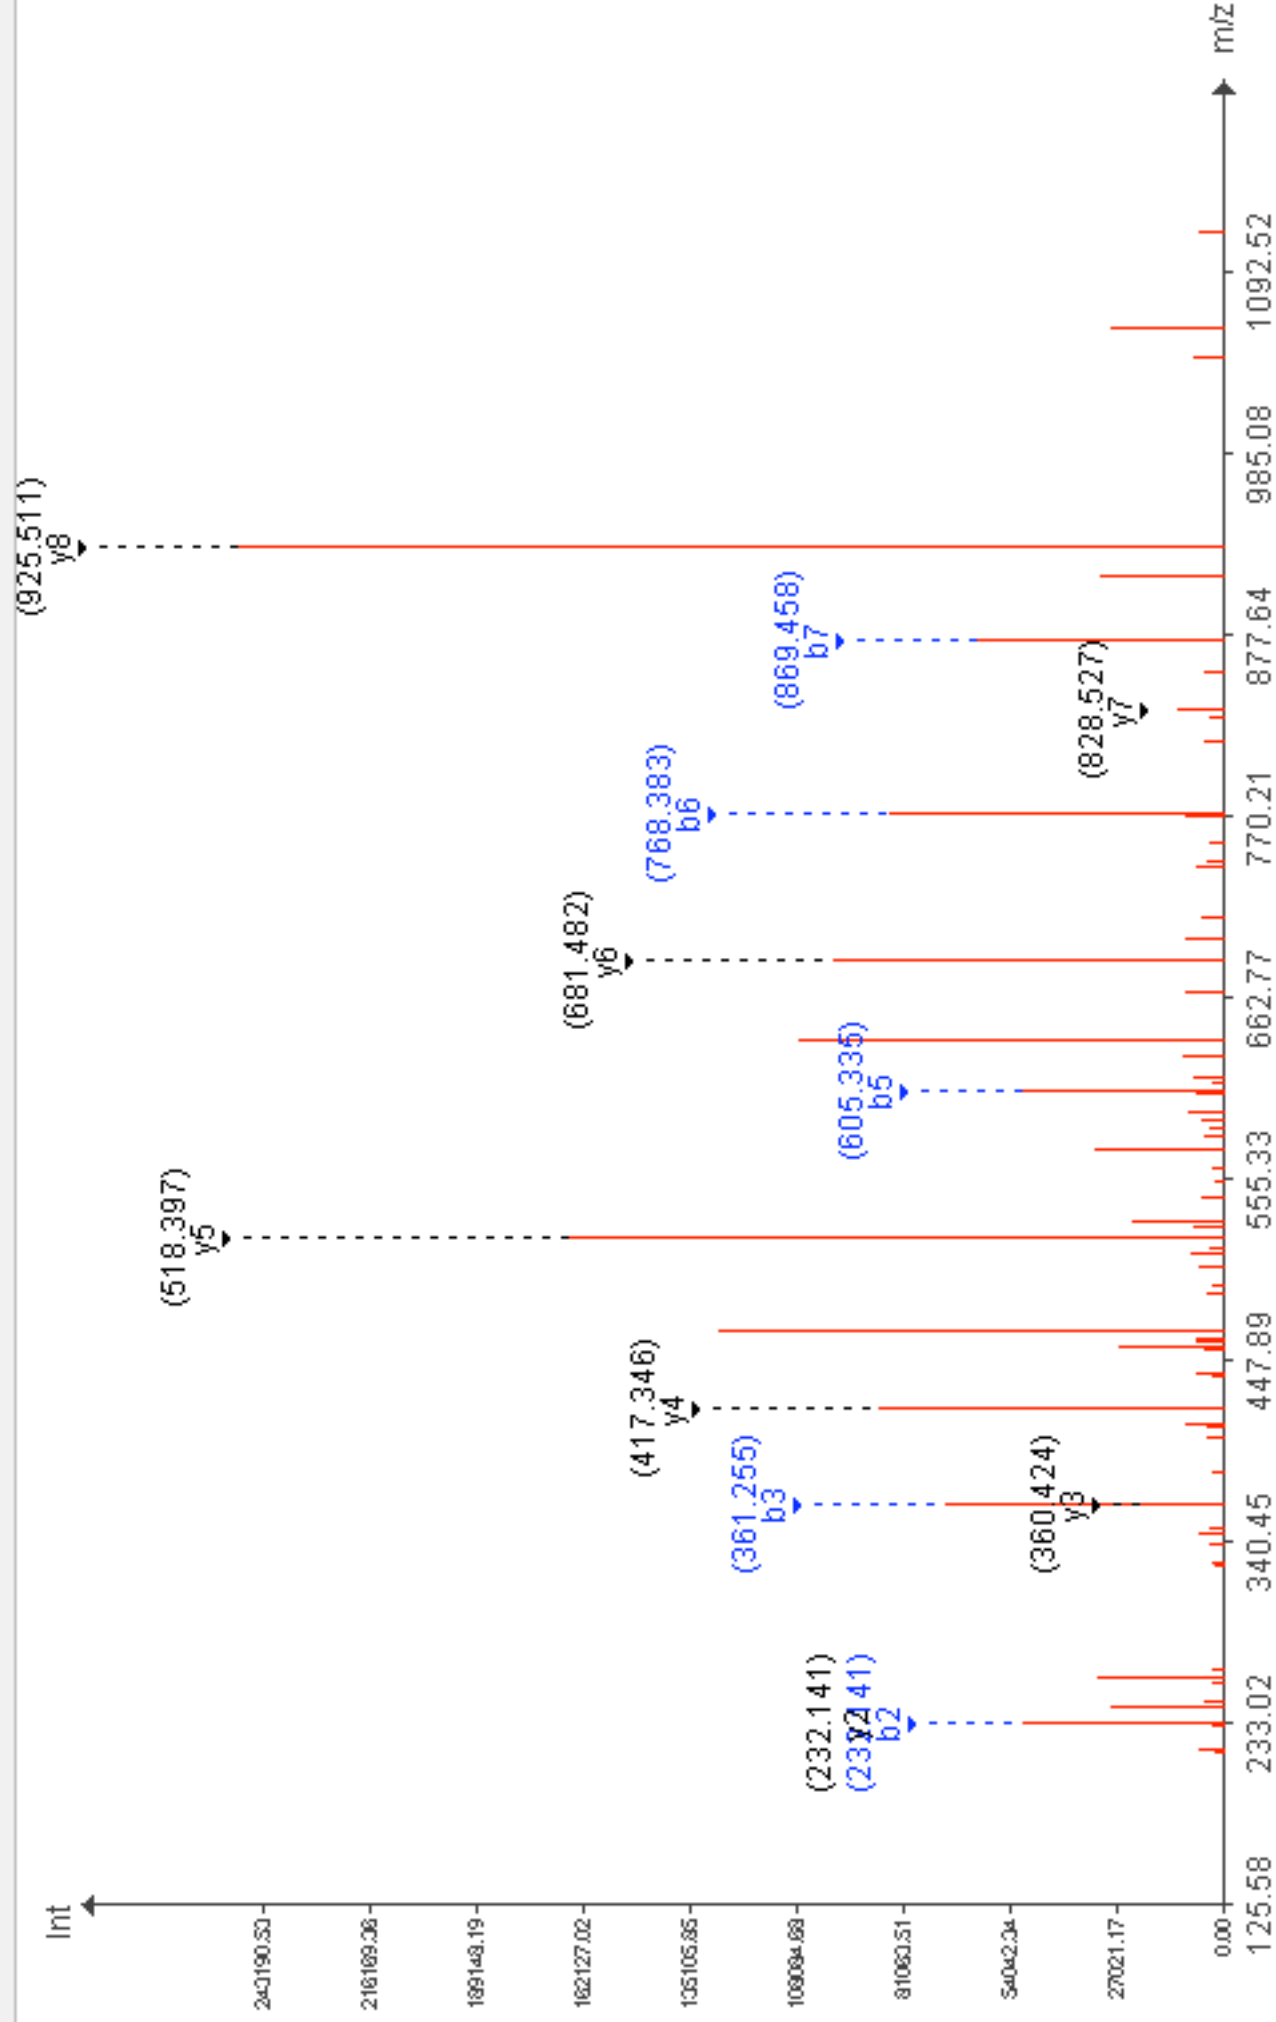

**AcD3-LASDQELQDAFSR-COOH**

precursor mass: 762.8610 Da (charge: +2) protein: Q9D903 (17-29)

score (threshold): 65.0 (42.0)

instrument: Agilent Esquire HCT

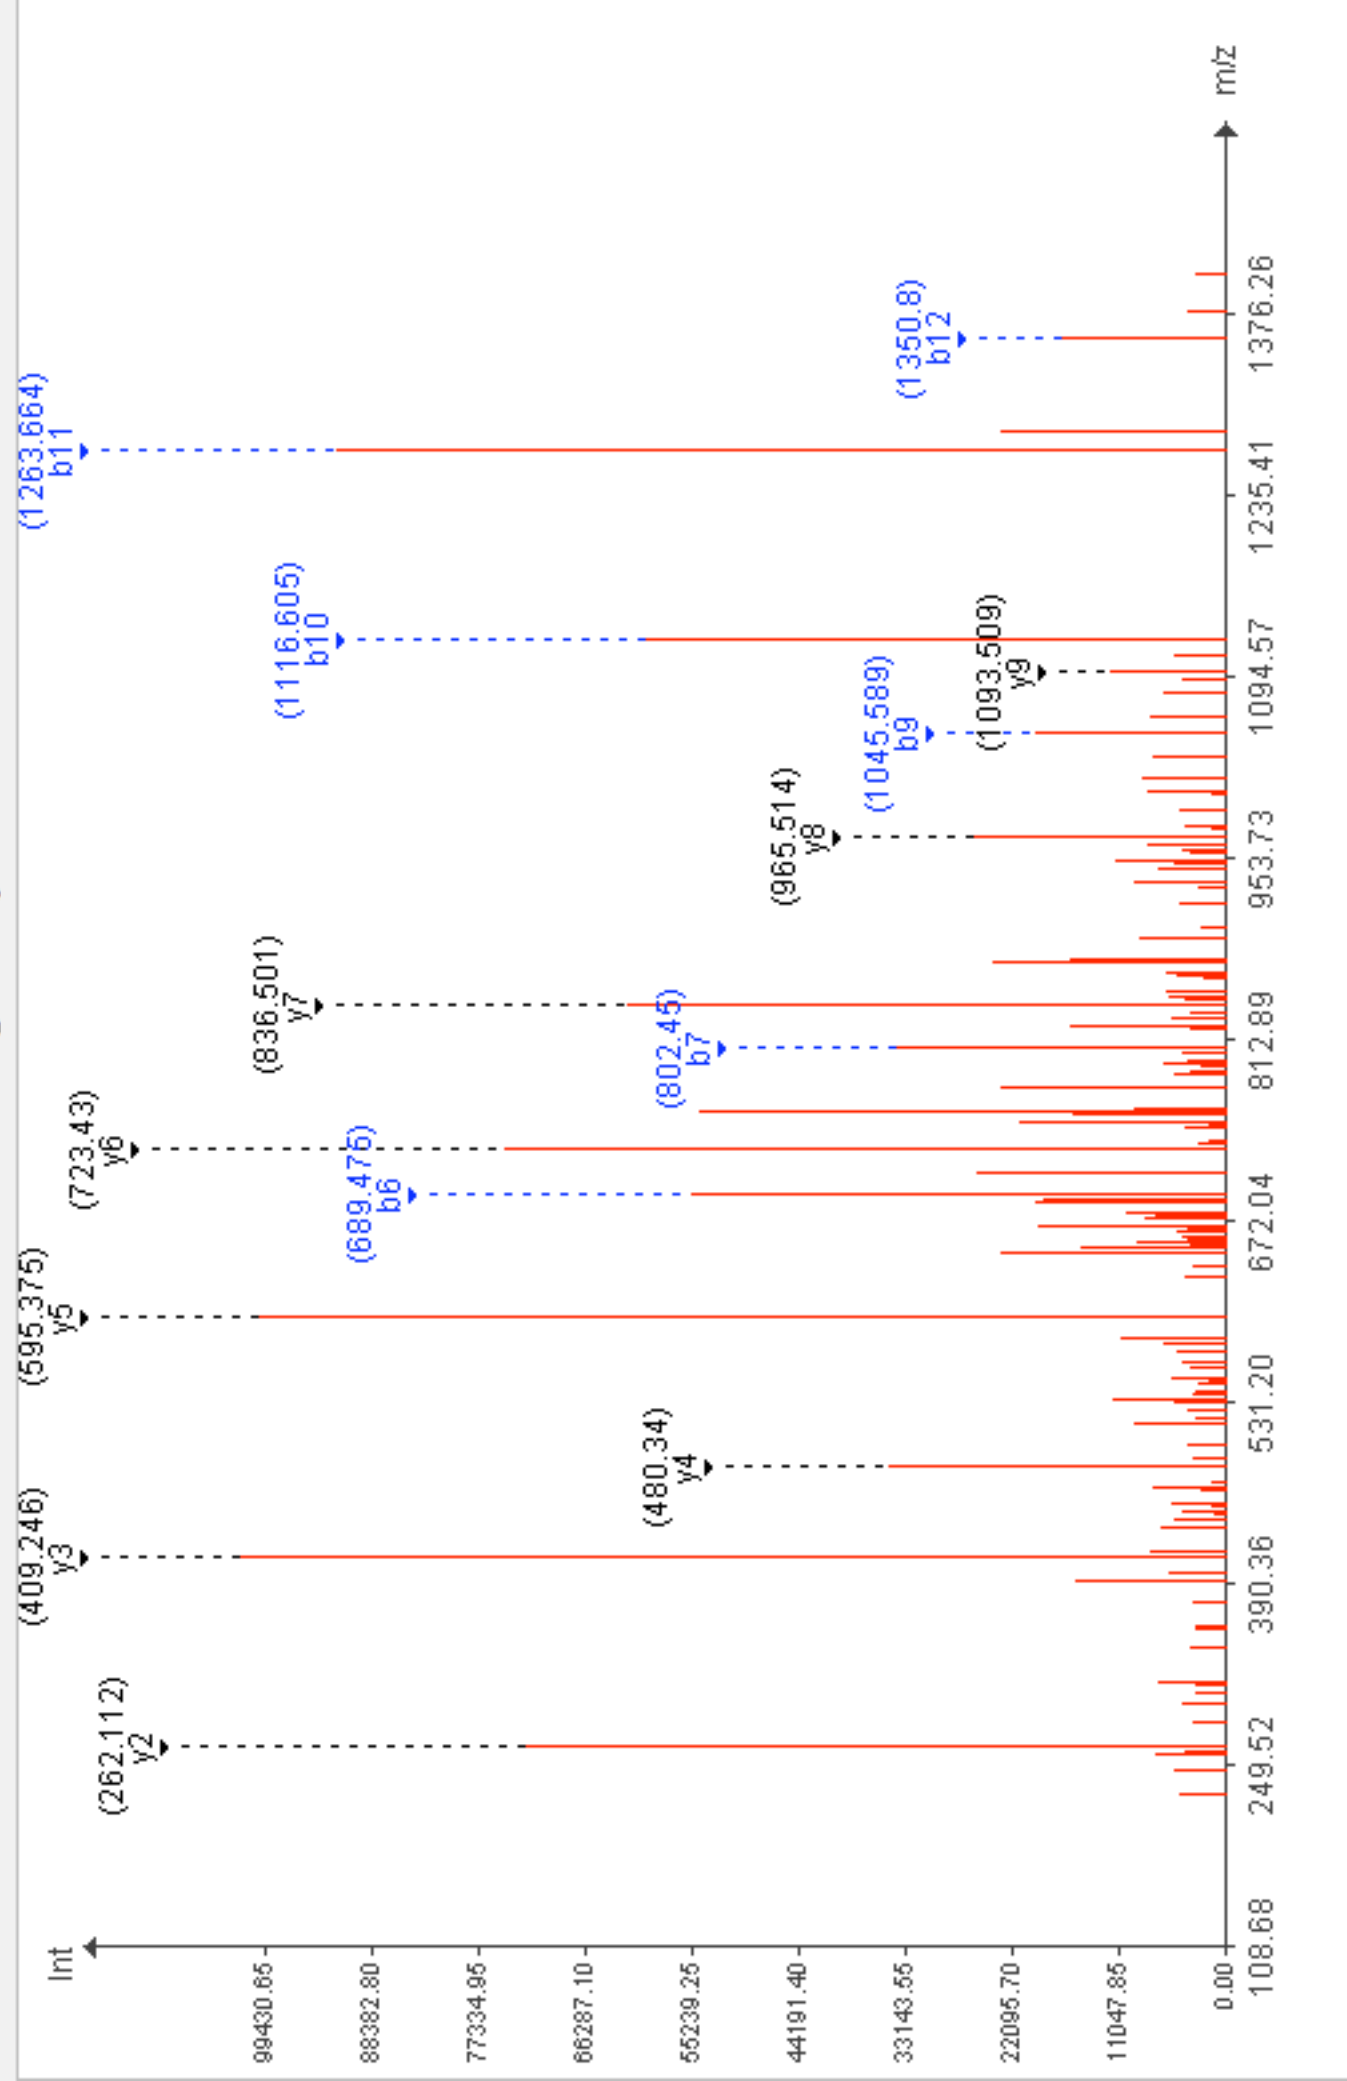

**AcD3-TK(AcD3K\*)PAVLAAPSGLER-COOH**

precursor mass: 750.4310 Da (charge: +2) protein: Q8K3X4 (116-129)

score (threshold): 75.0 (42.0)

instrument: Agilent Esquire HCT

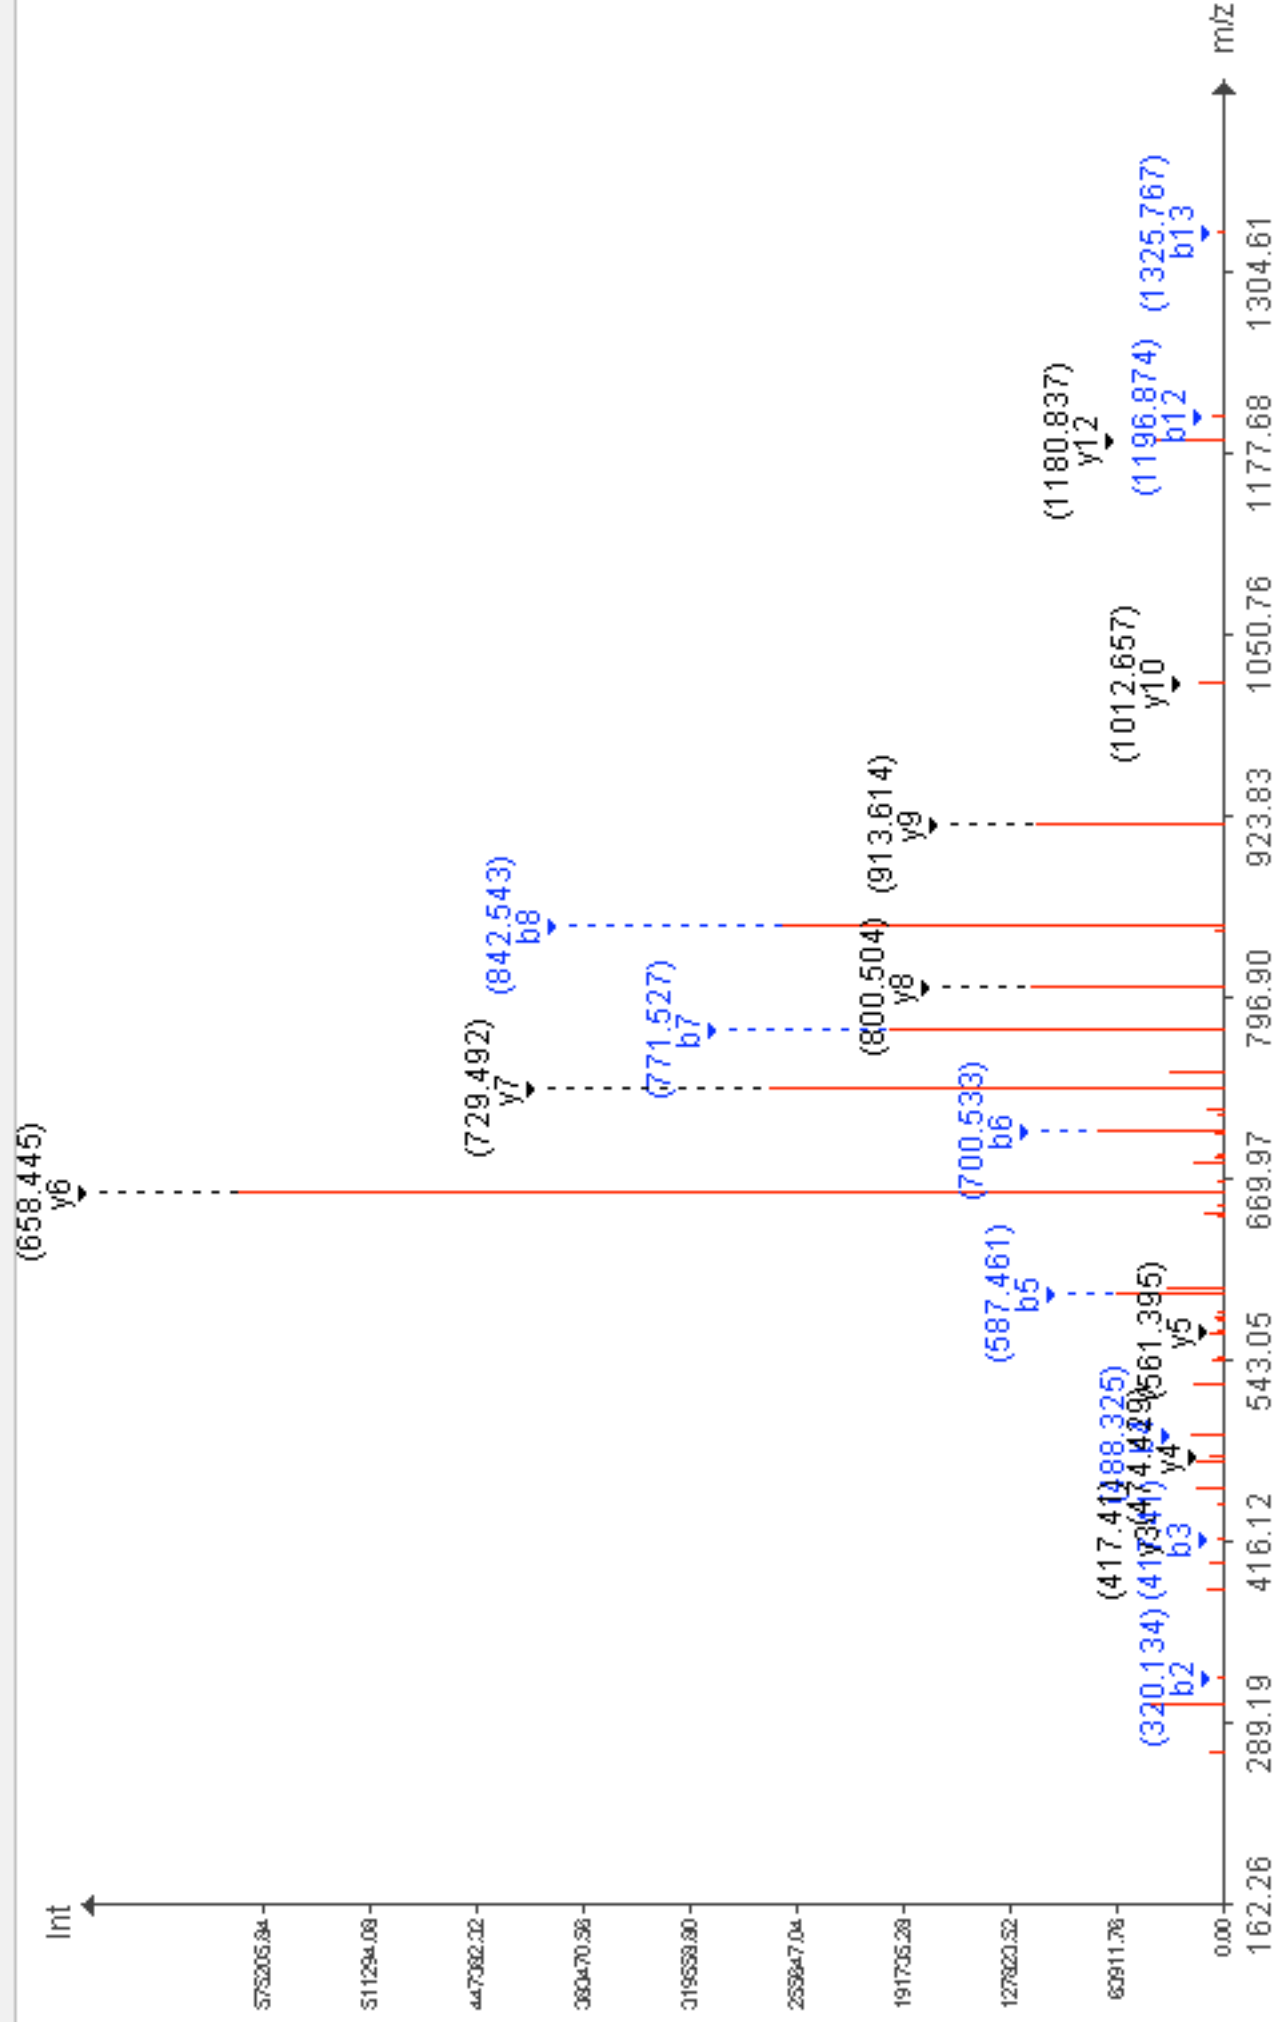

AcD3-EGDGEEDGDEDEEEAEAPTGK(AcD3K\*)R-COOH

precursor mass: 818.7190 Da (charge: +3) protein: P26350 (68-89)

score (threshold): 41.0 (35.0)

instrument: Agilent Esquire HCT

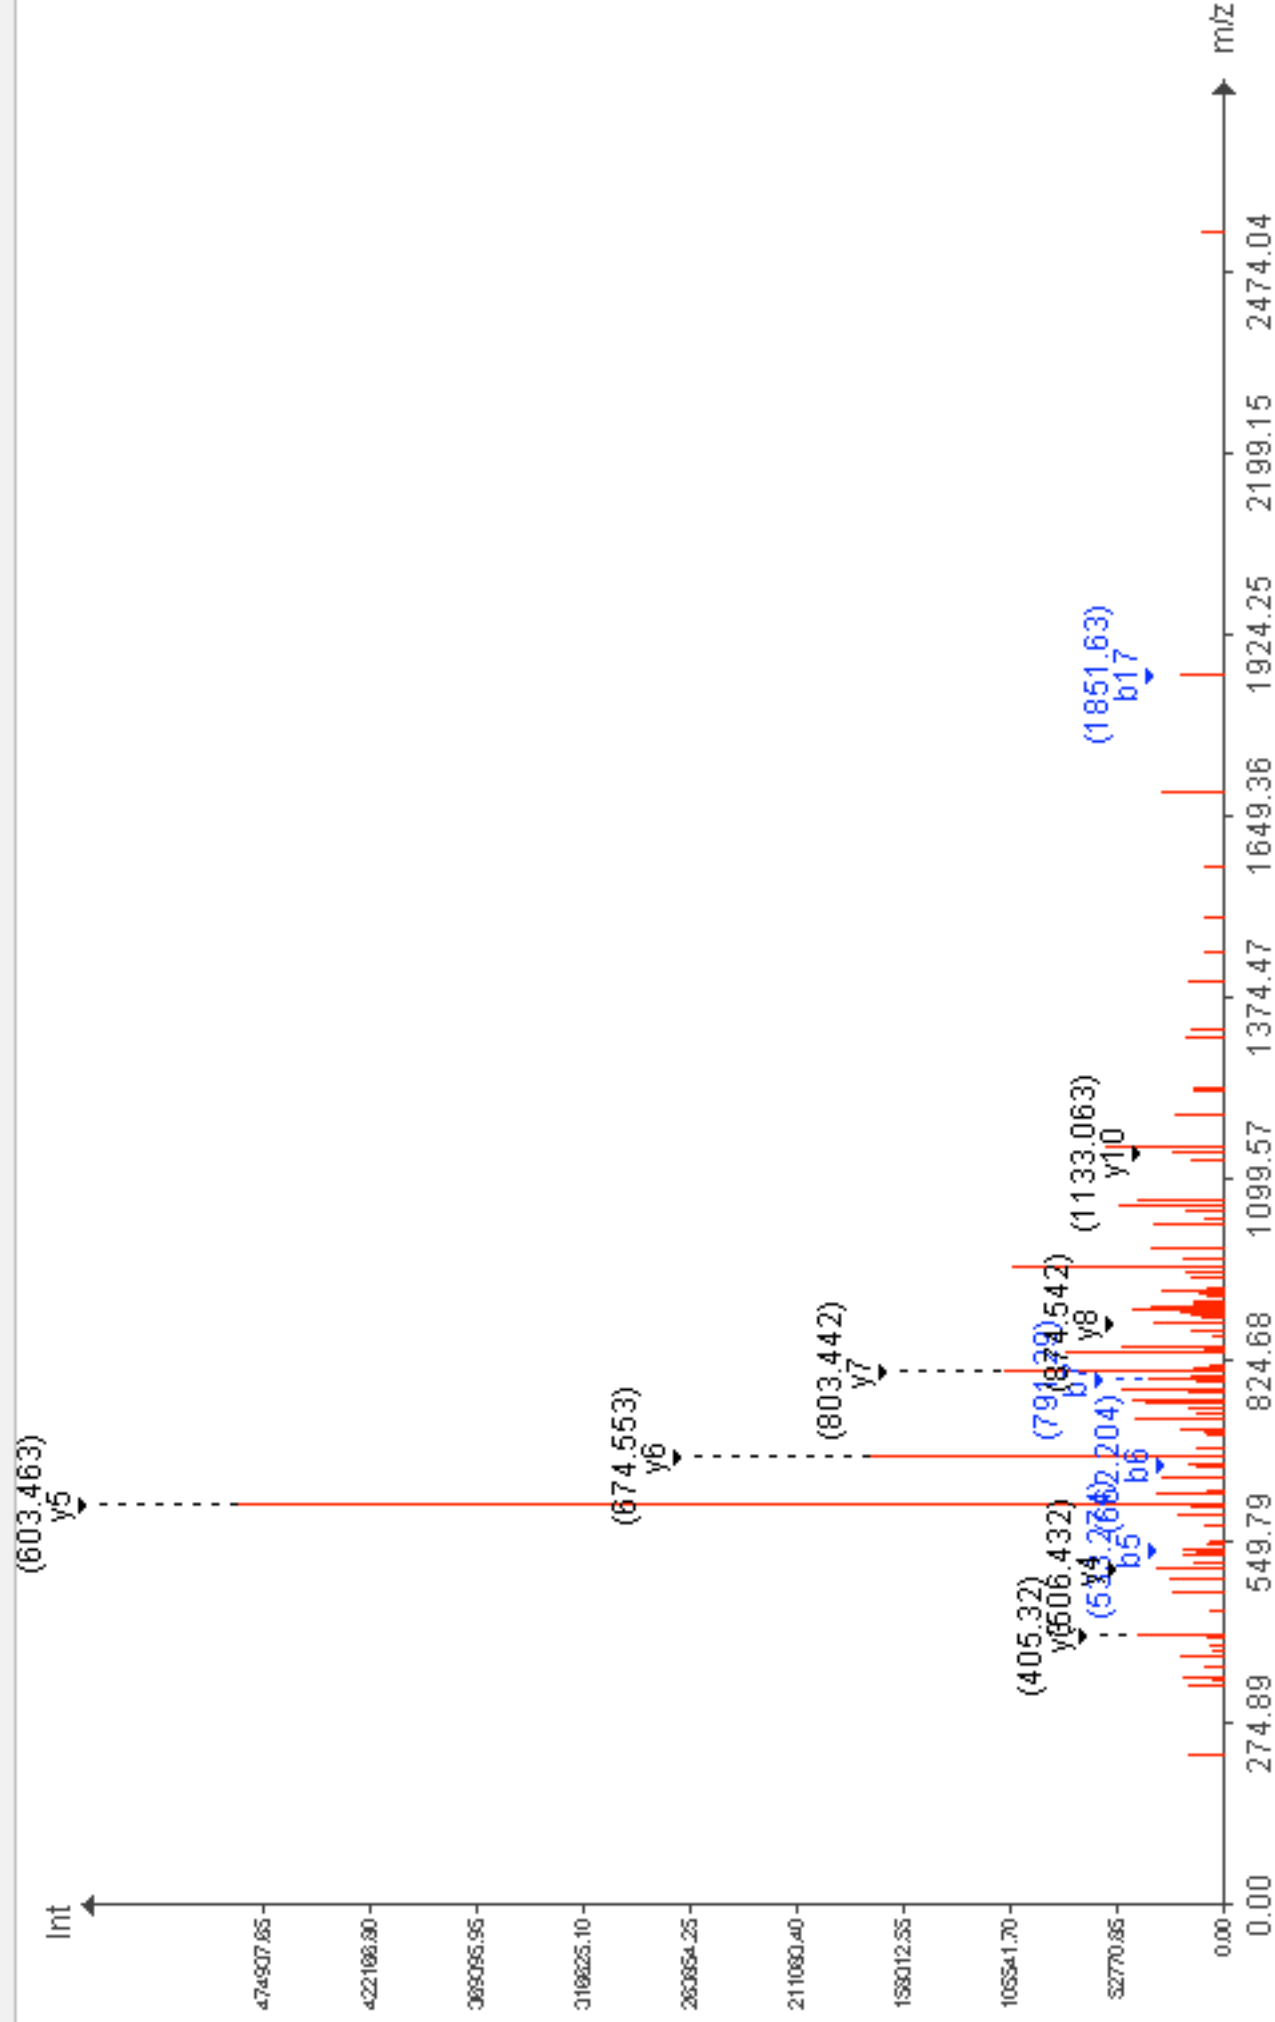

**AcD3-VVSSDDEELSR-COOH**

**precursor mass: 640.8980 Da (charge: +2) protein: Q9QZS2 (96-106)**

**score (threshold): 51.0 (42.0)**

**instrument: Agilent Esquire HCT**

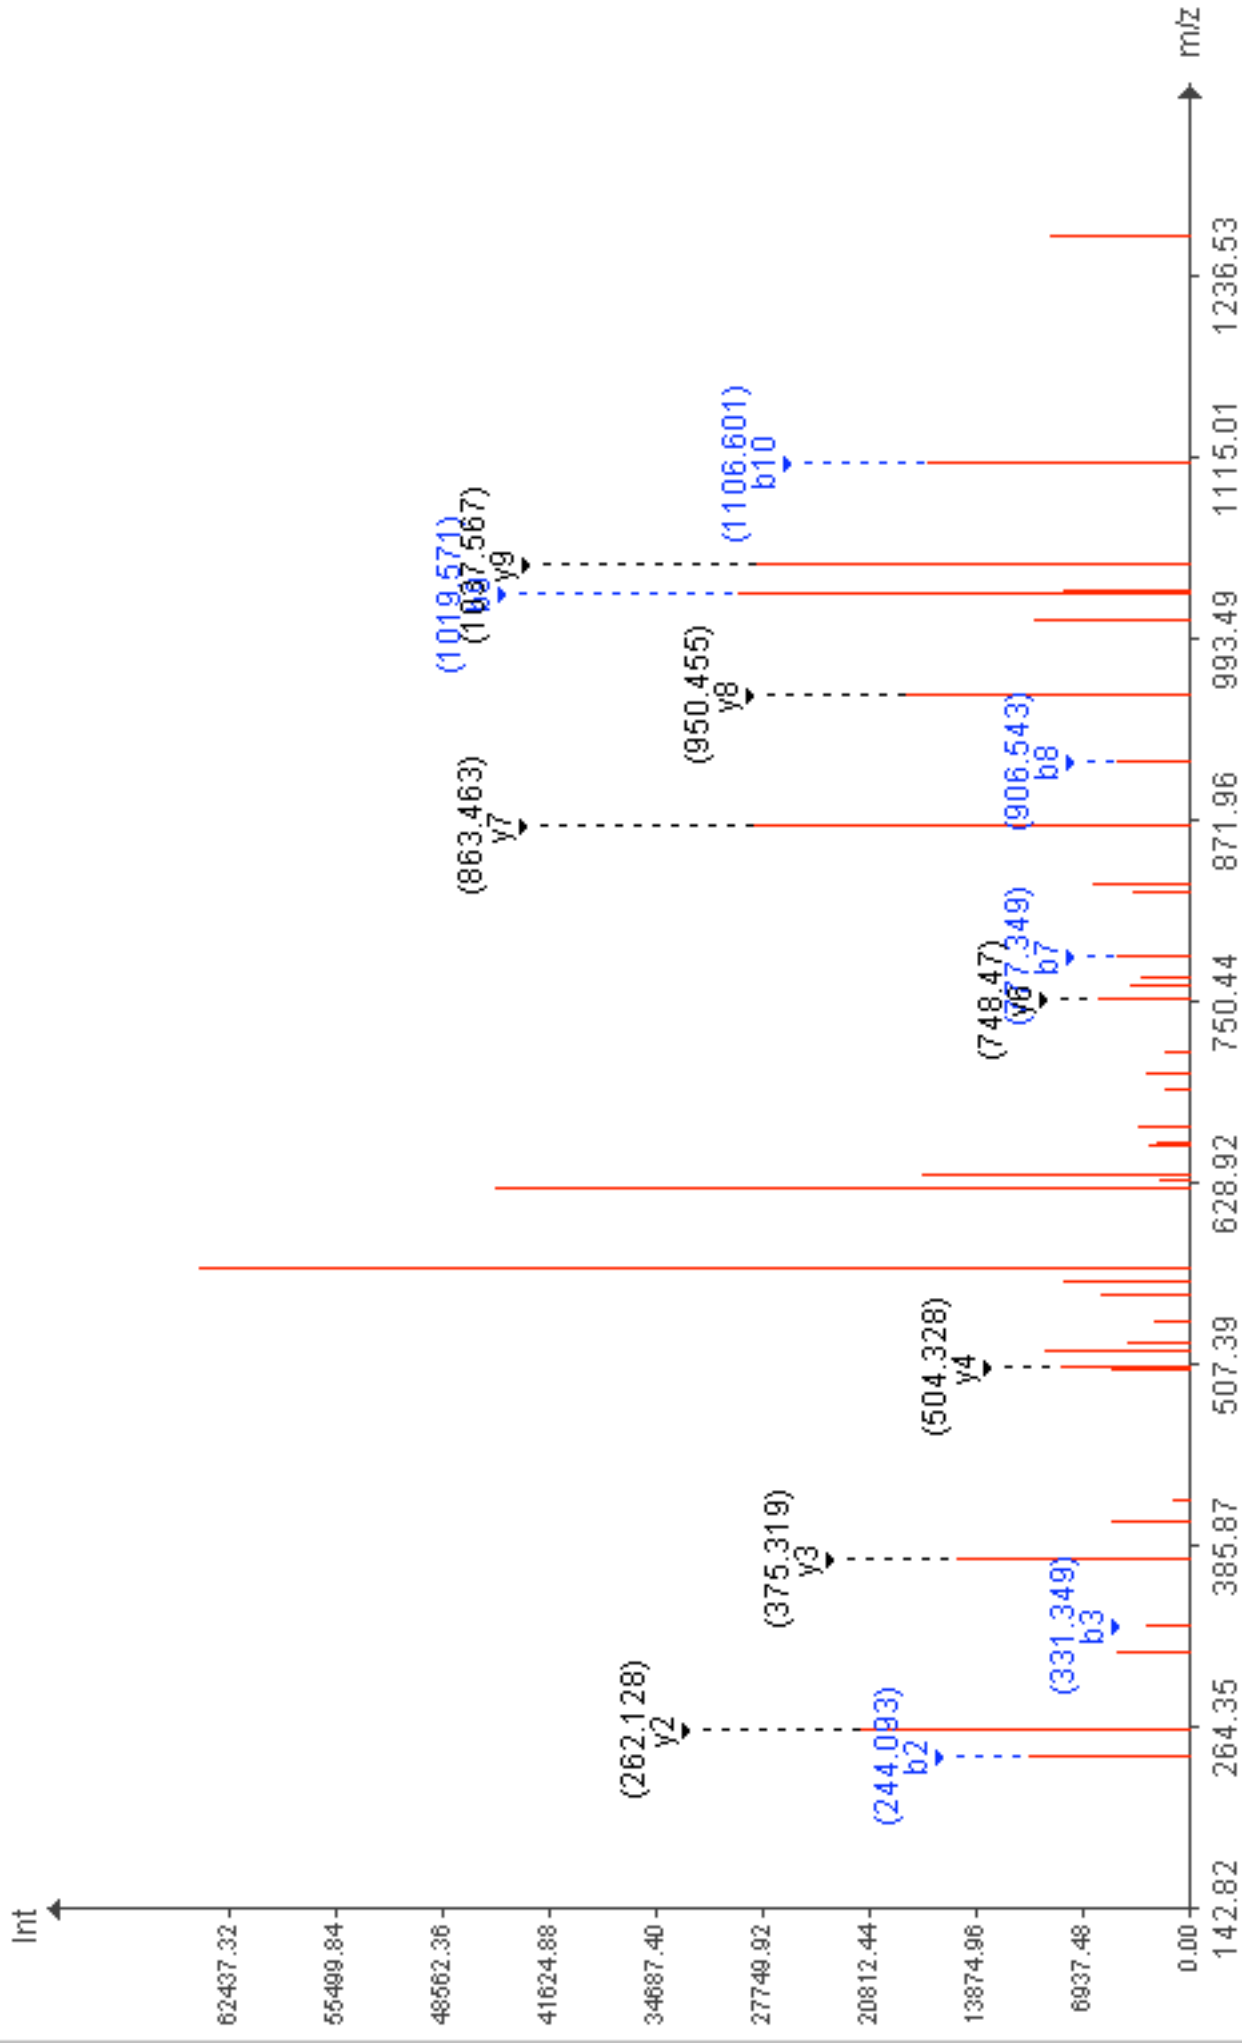

**AcD3-STDPQLSEALR-COOH**

precursor mass: 795.4170 Da (charge: +2) protein: Q60710 (445-458)

score (threshold): 76.0 (42.0)

instrument: Agilent Esquire HCT

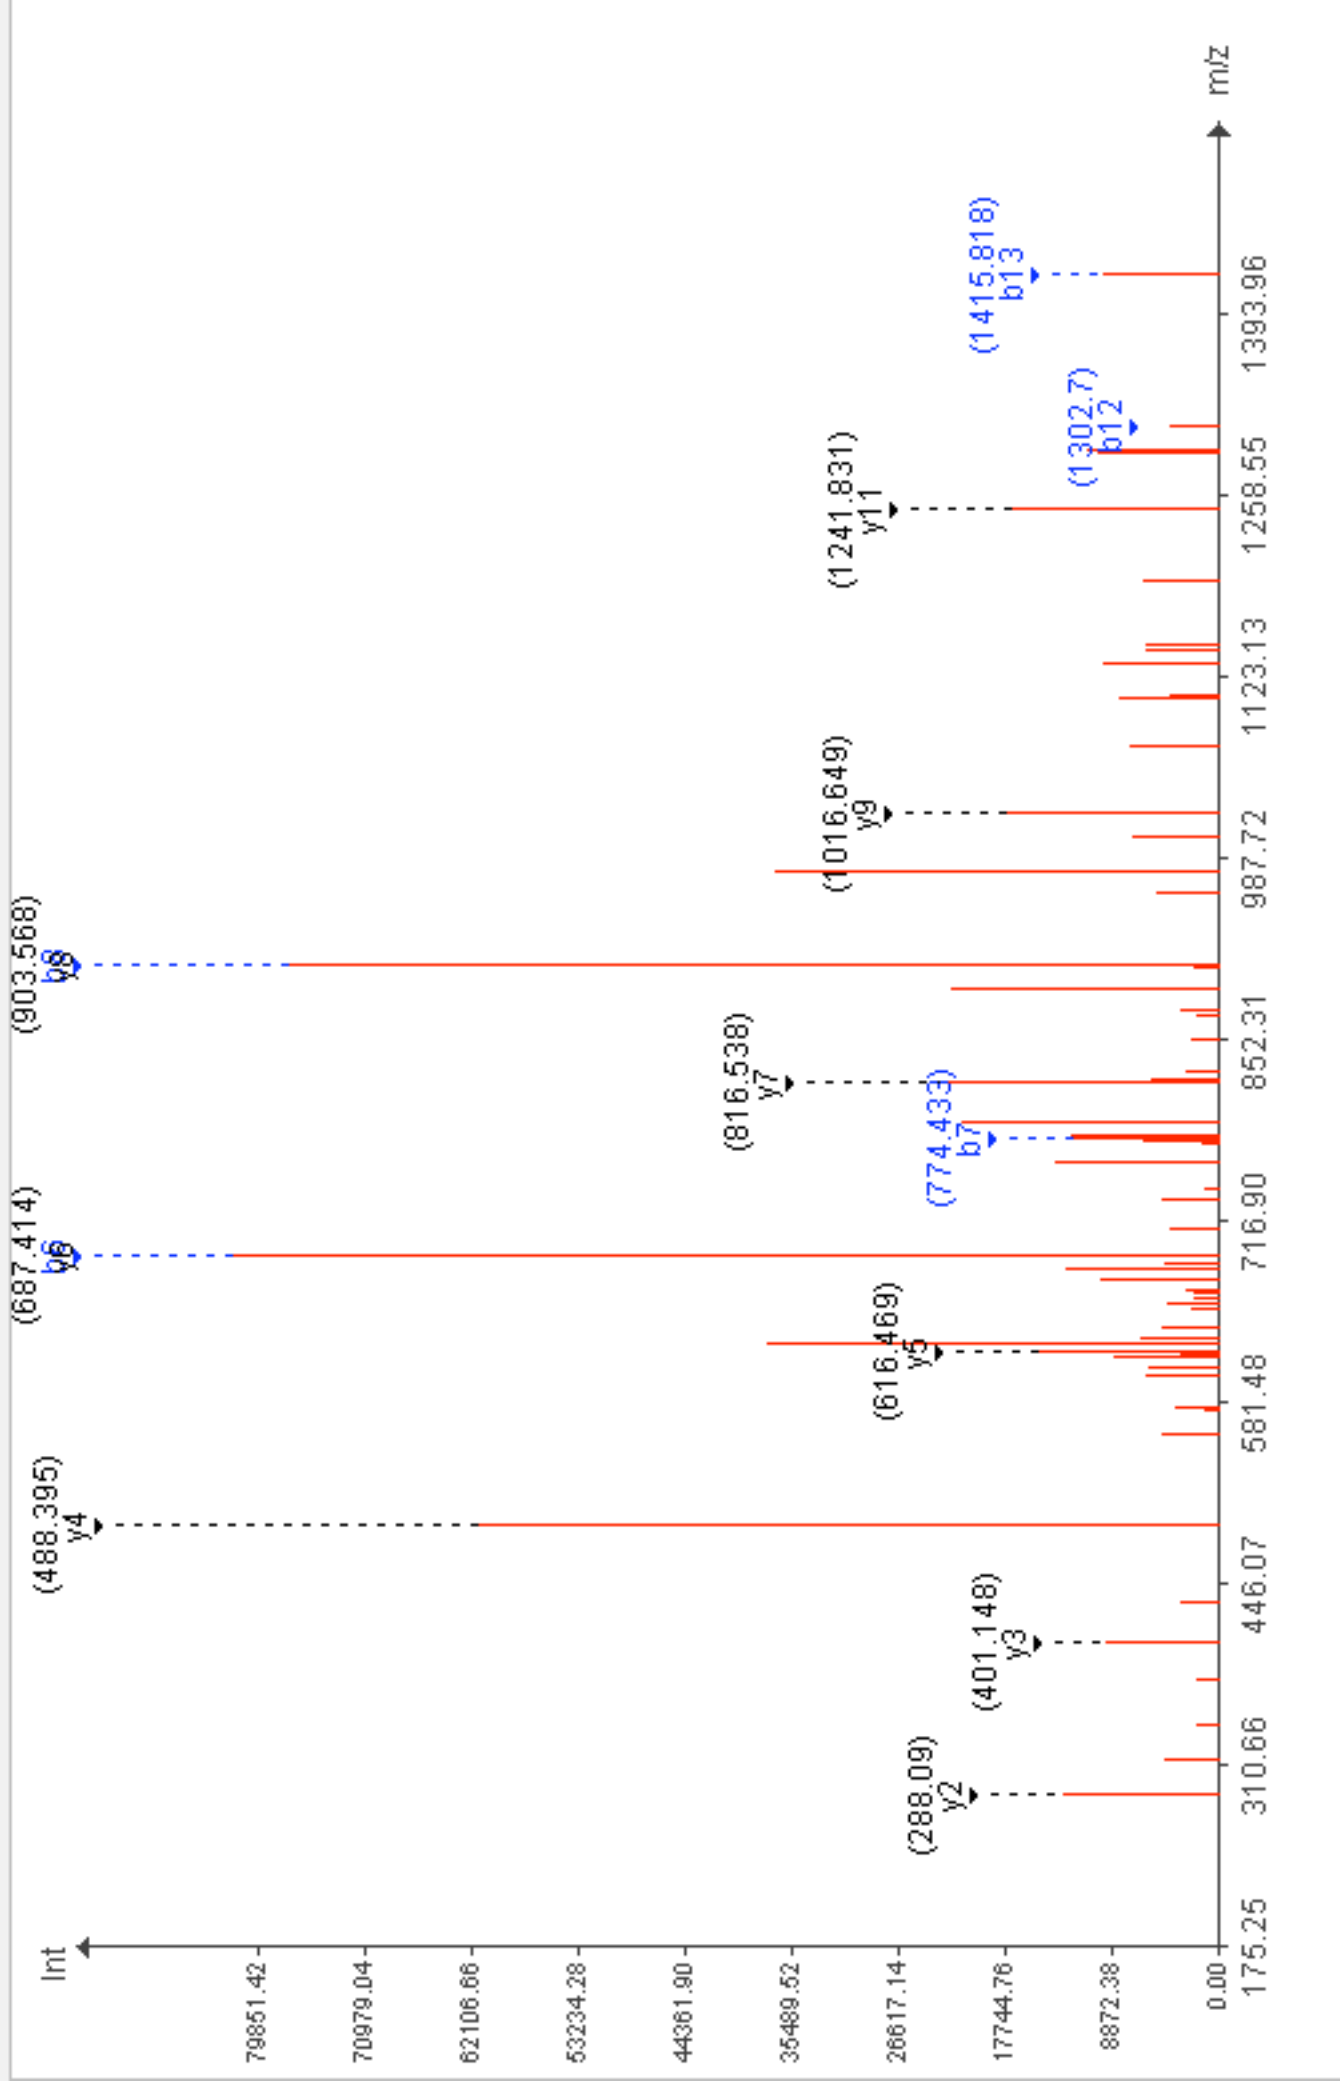



**AcD3-M(Mox)APAL.SGANL.TSPR-COOH**

precursor mass: 723.9500 Da (charge: +2) protein: Q8BTI8 (2324-2337)

score (threshold): 45.0 (30.0)

instrument: Agilent Esquire HCT

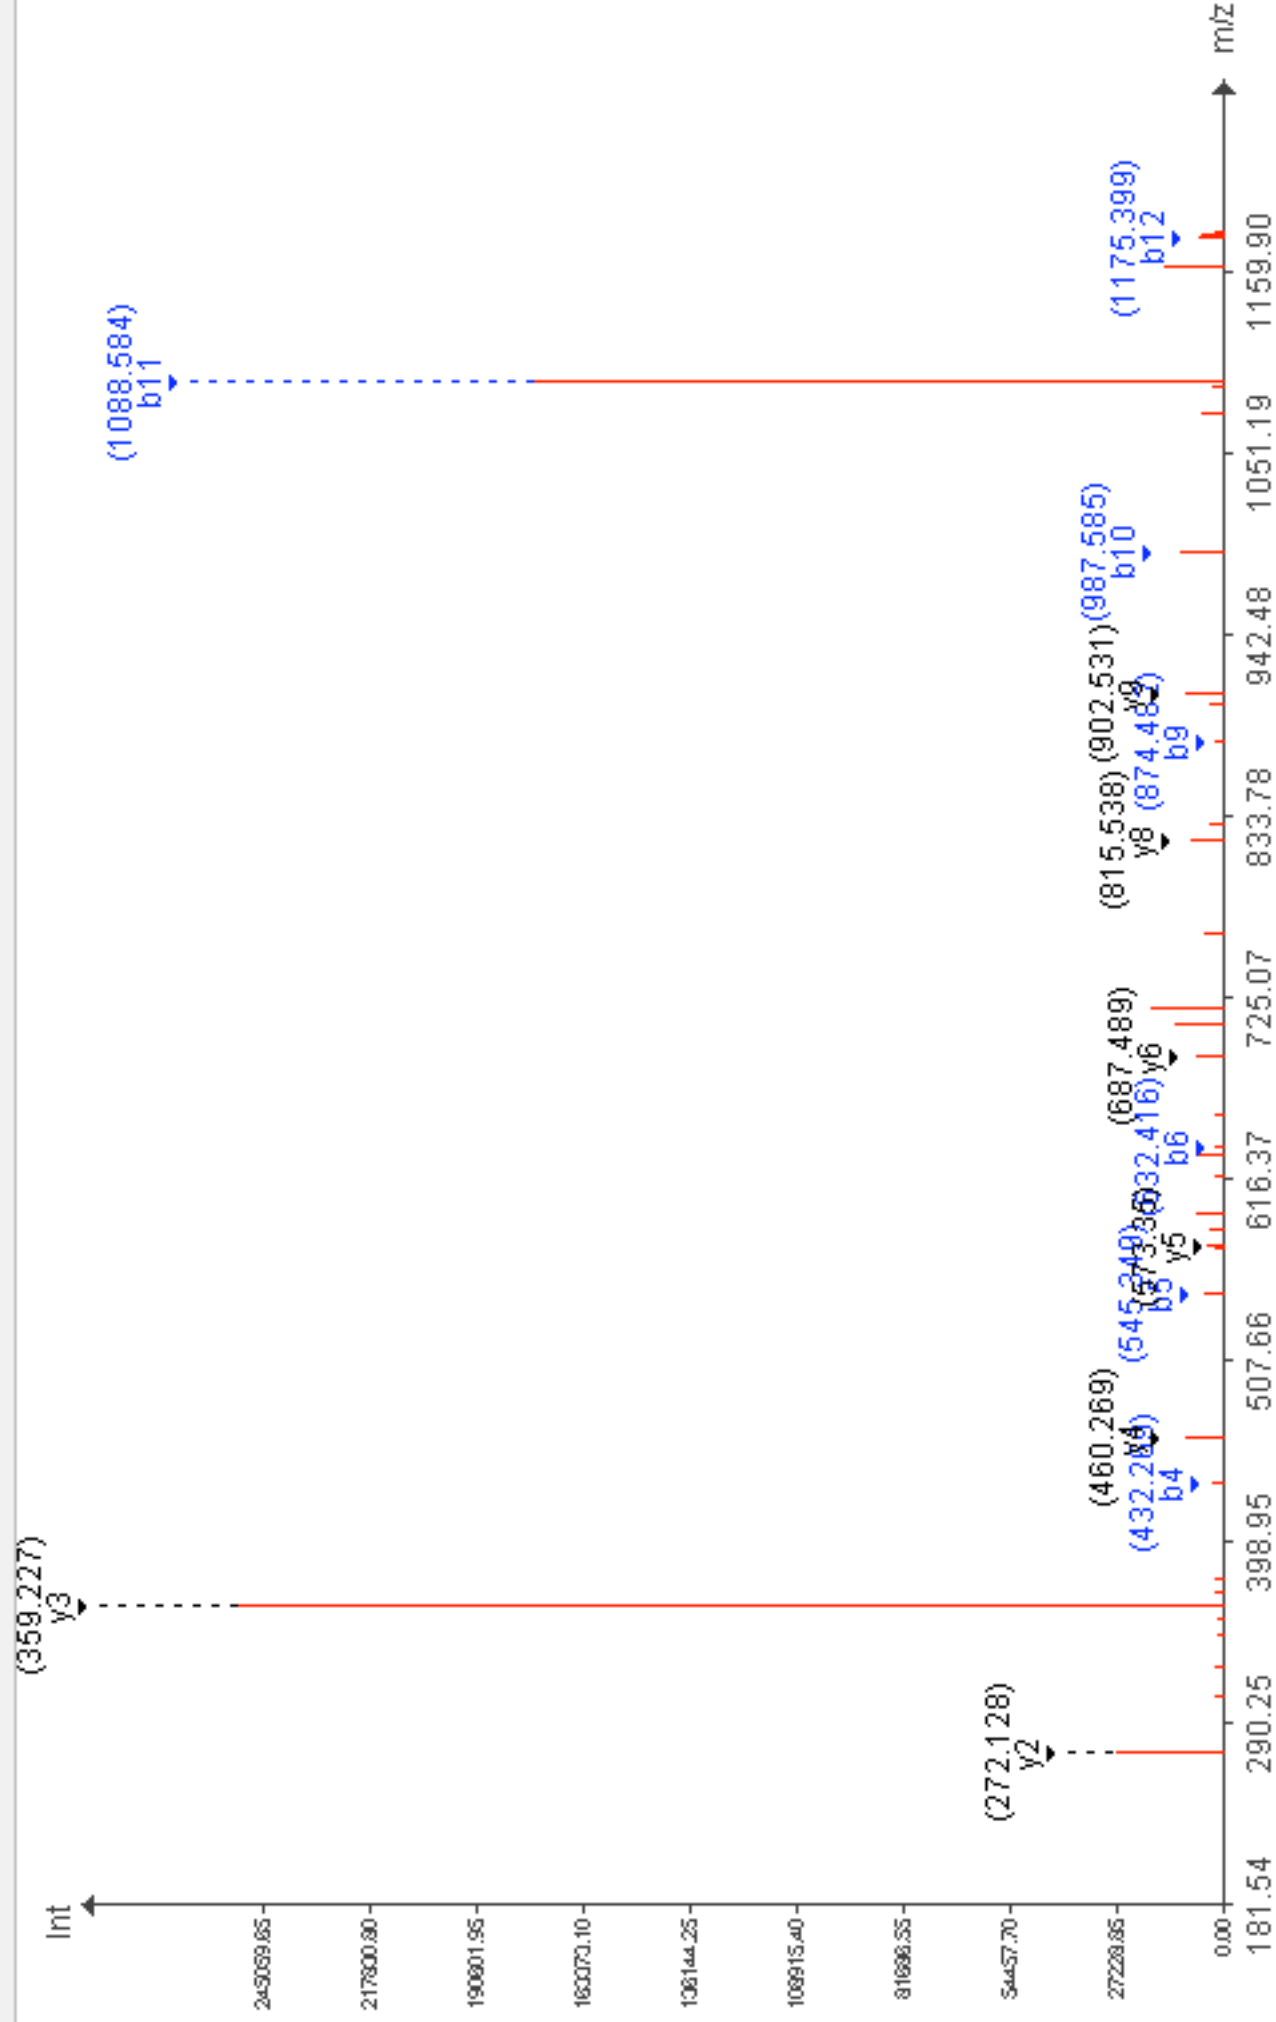

**AcD3-GENLVSM(Mox)TVEGPPPK(AcD3K\*)DTGIAR-COOH**  
precursor mass: 758.7280 Da (charge: +3) protein: P27048 (74-94)  
score (threshold): 62.0 (46.0)  
instrument: Agilent Esquire HCT

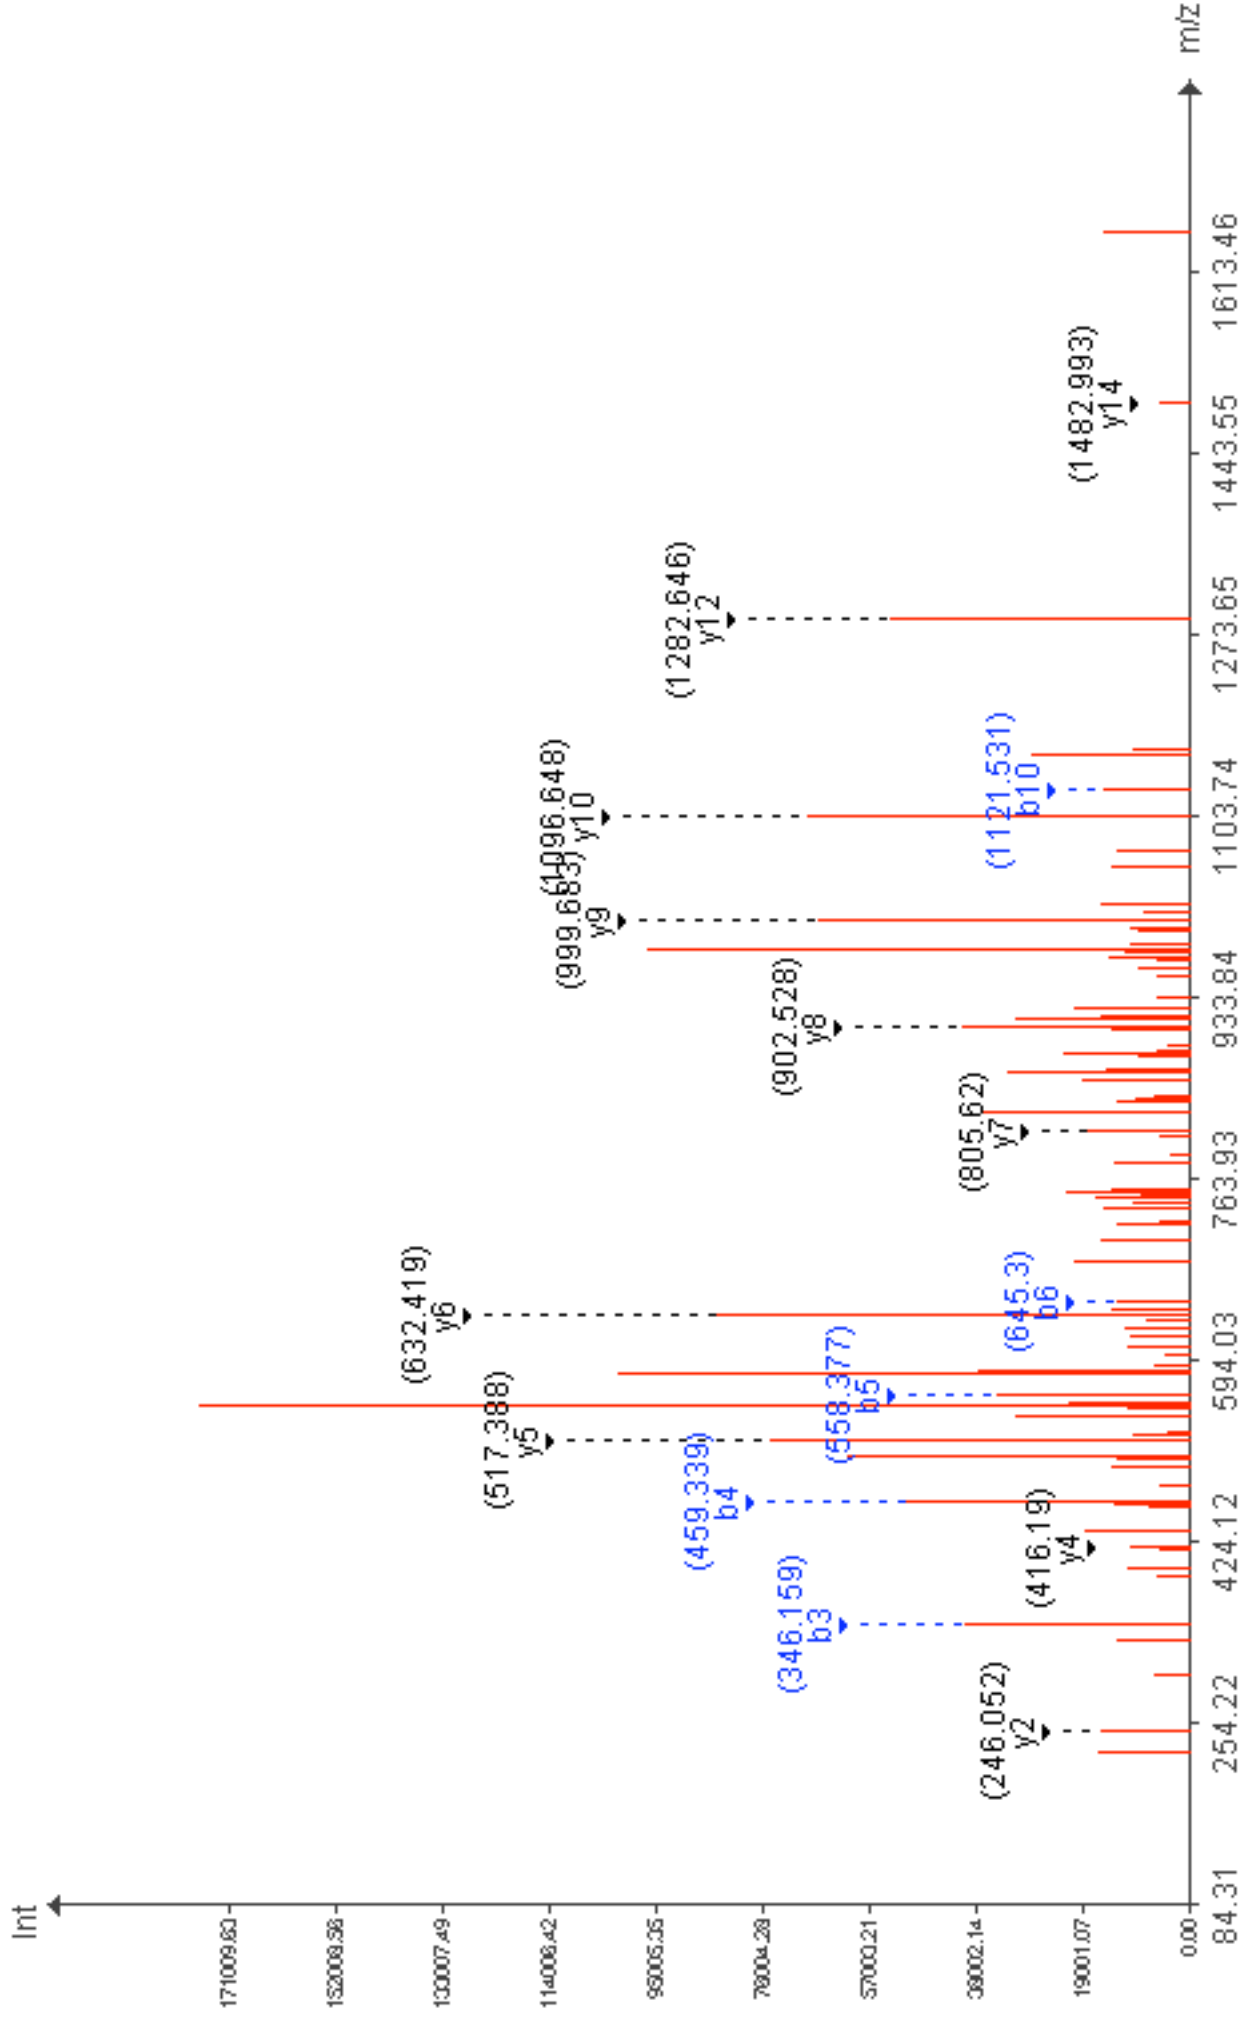

**AcD3-TPTPVPVGSQM(Mox)TR-COOH**

precursor mass: 765.9100 Da (charge: +2) protein: P26369 (133-146)

score (threshold): 68.0 (42.0)

instrument: Agilent Esquire HCT

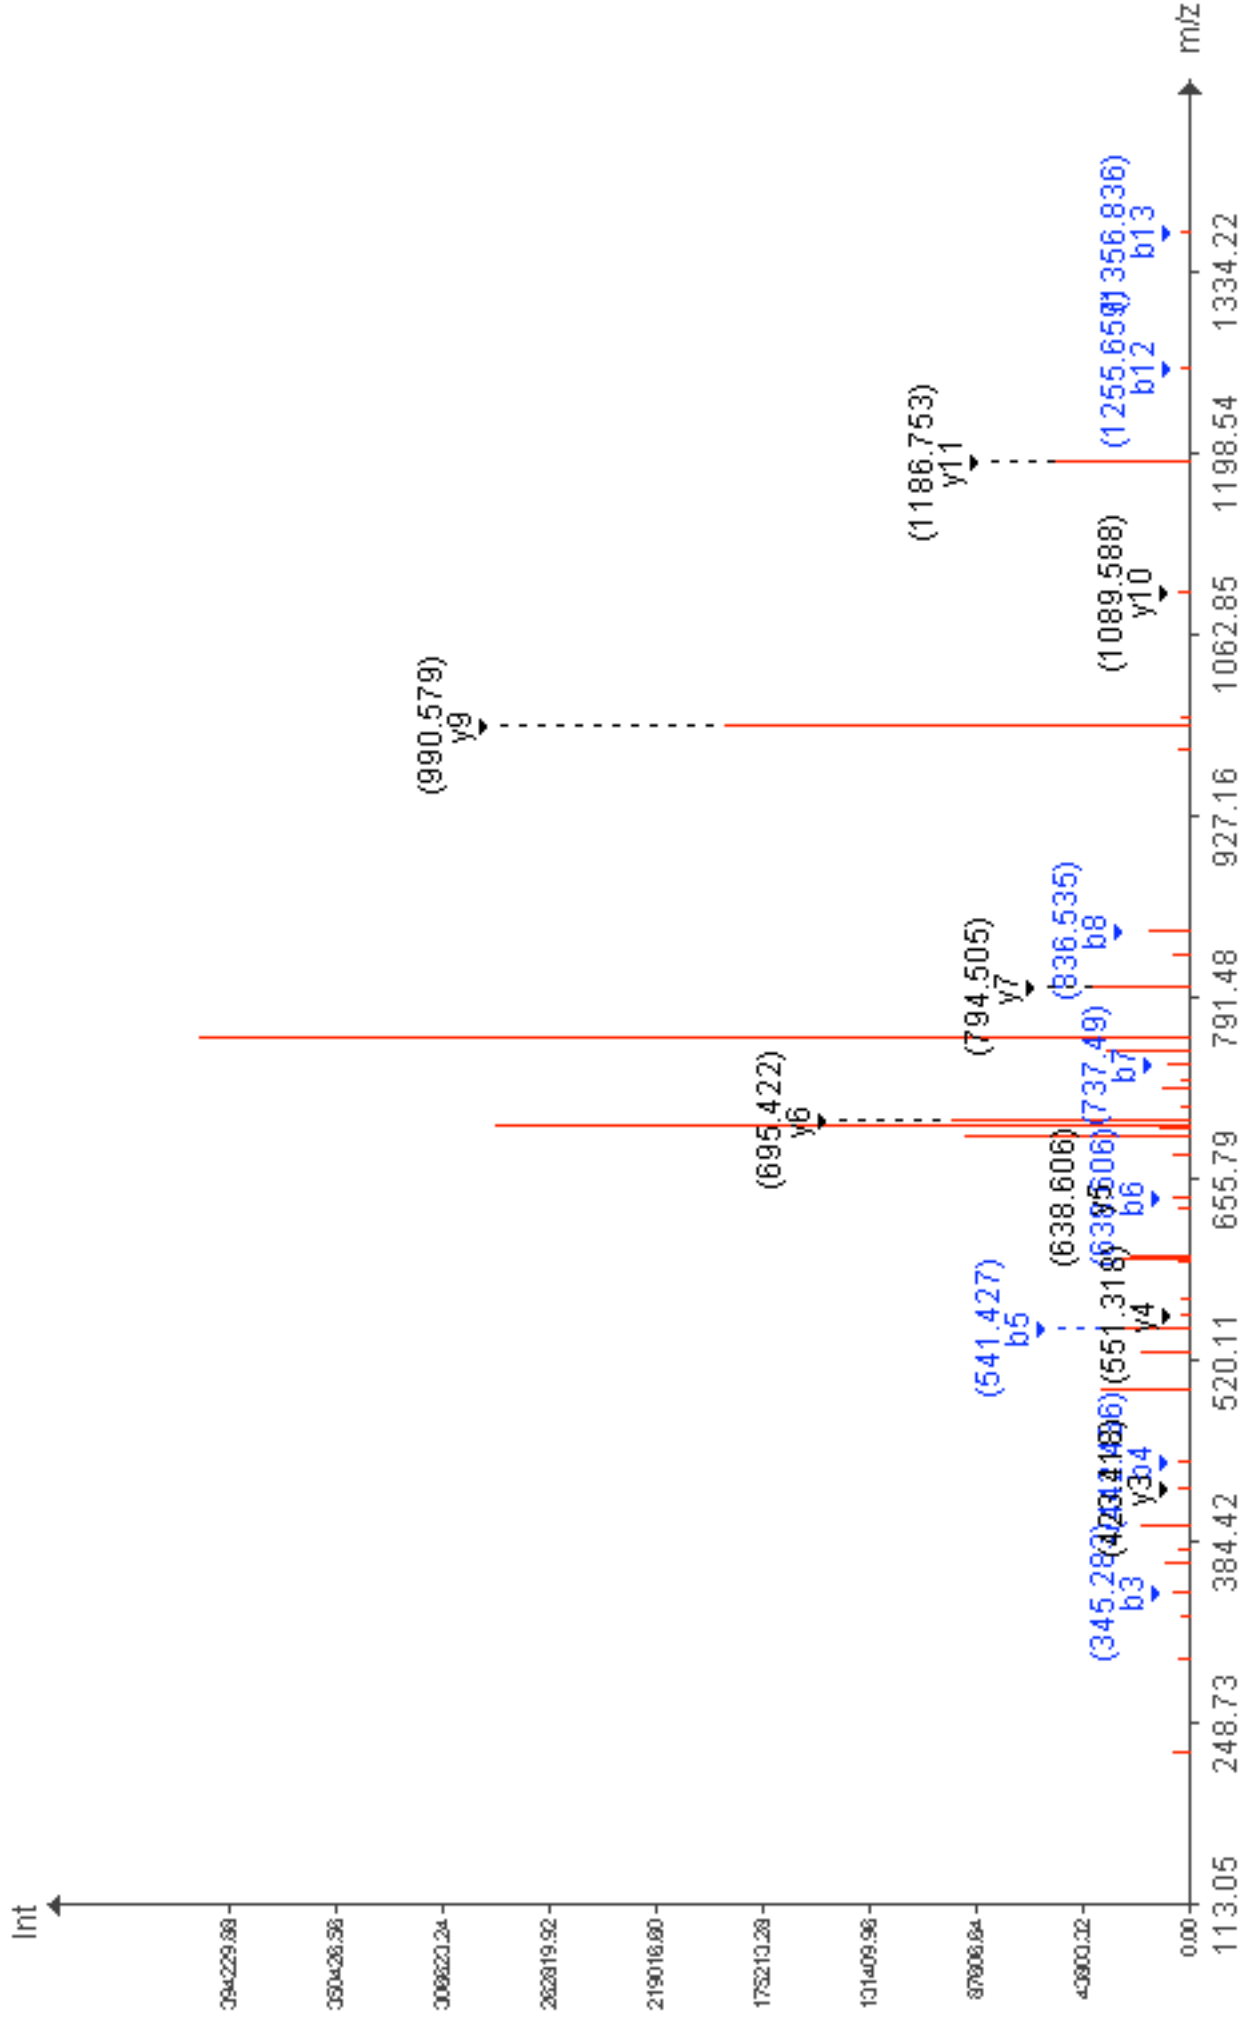

AcD3-GEAAATEVDLER-COOH

precursor mass: 653.1680 Da (charge: +2) protein: O54988 (668-679)

score (threshold): 52.0 (45.0)

instrument: Agilent Esquire HCT

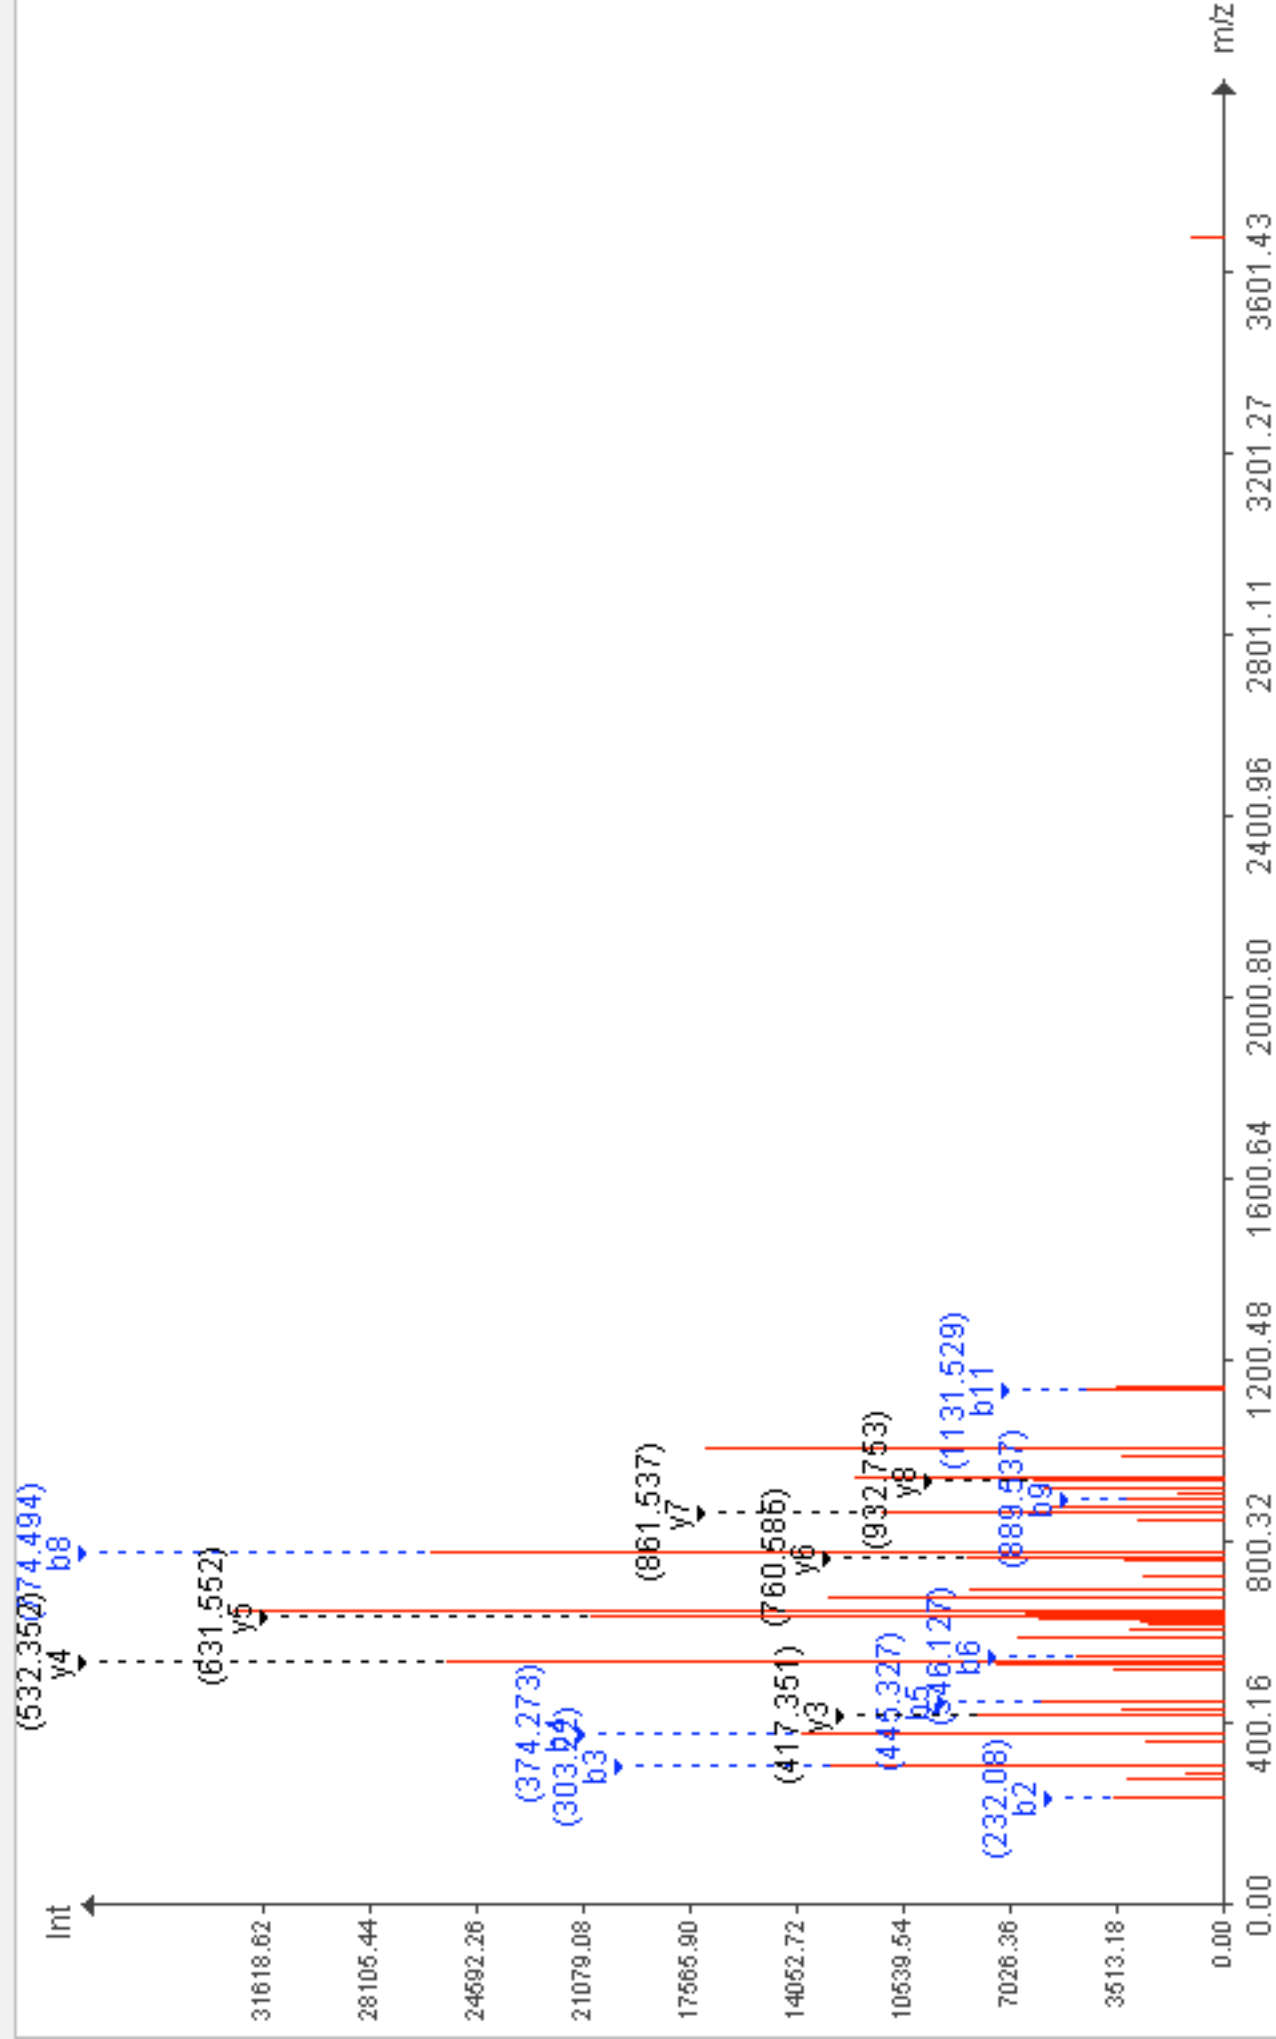

**AcD3-EVIDPQDLLEGR-COOH**

precursor mass: 714.8560 Da (charge: +2) protein: O35988 (30-41)

score (threshold): 62.0 (42.0)

instrument: Agilent Esquire HCT

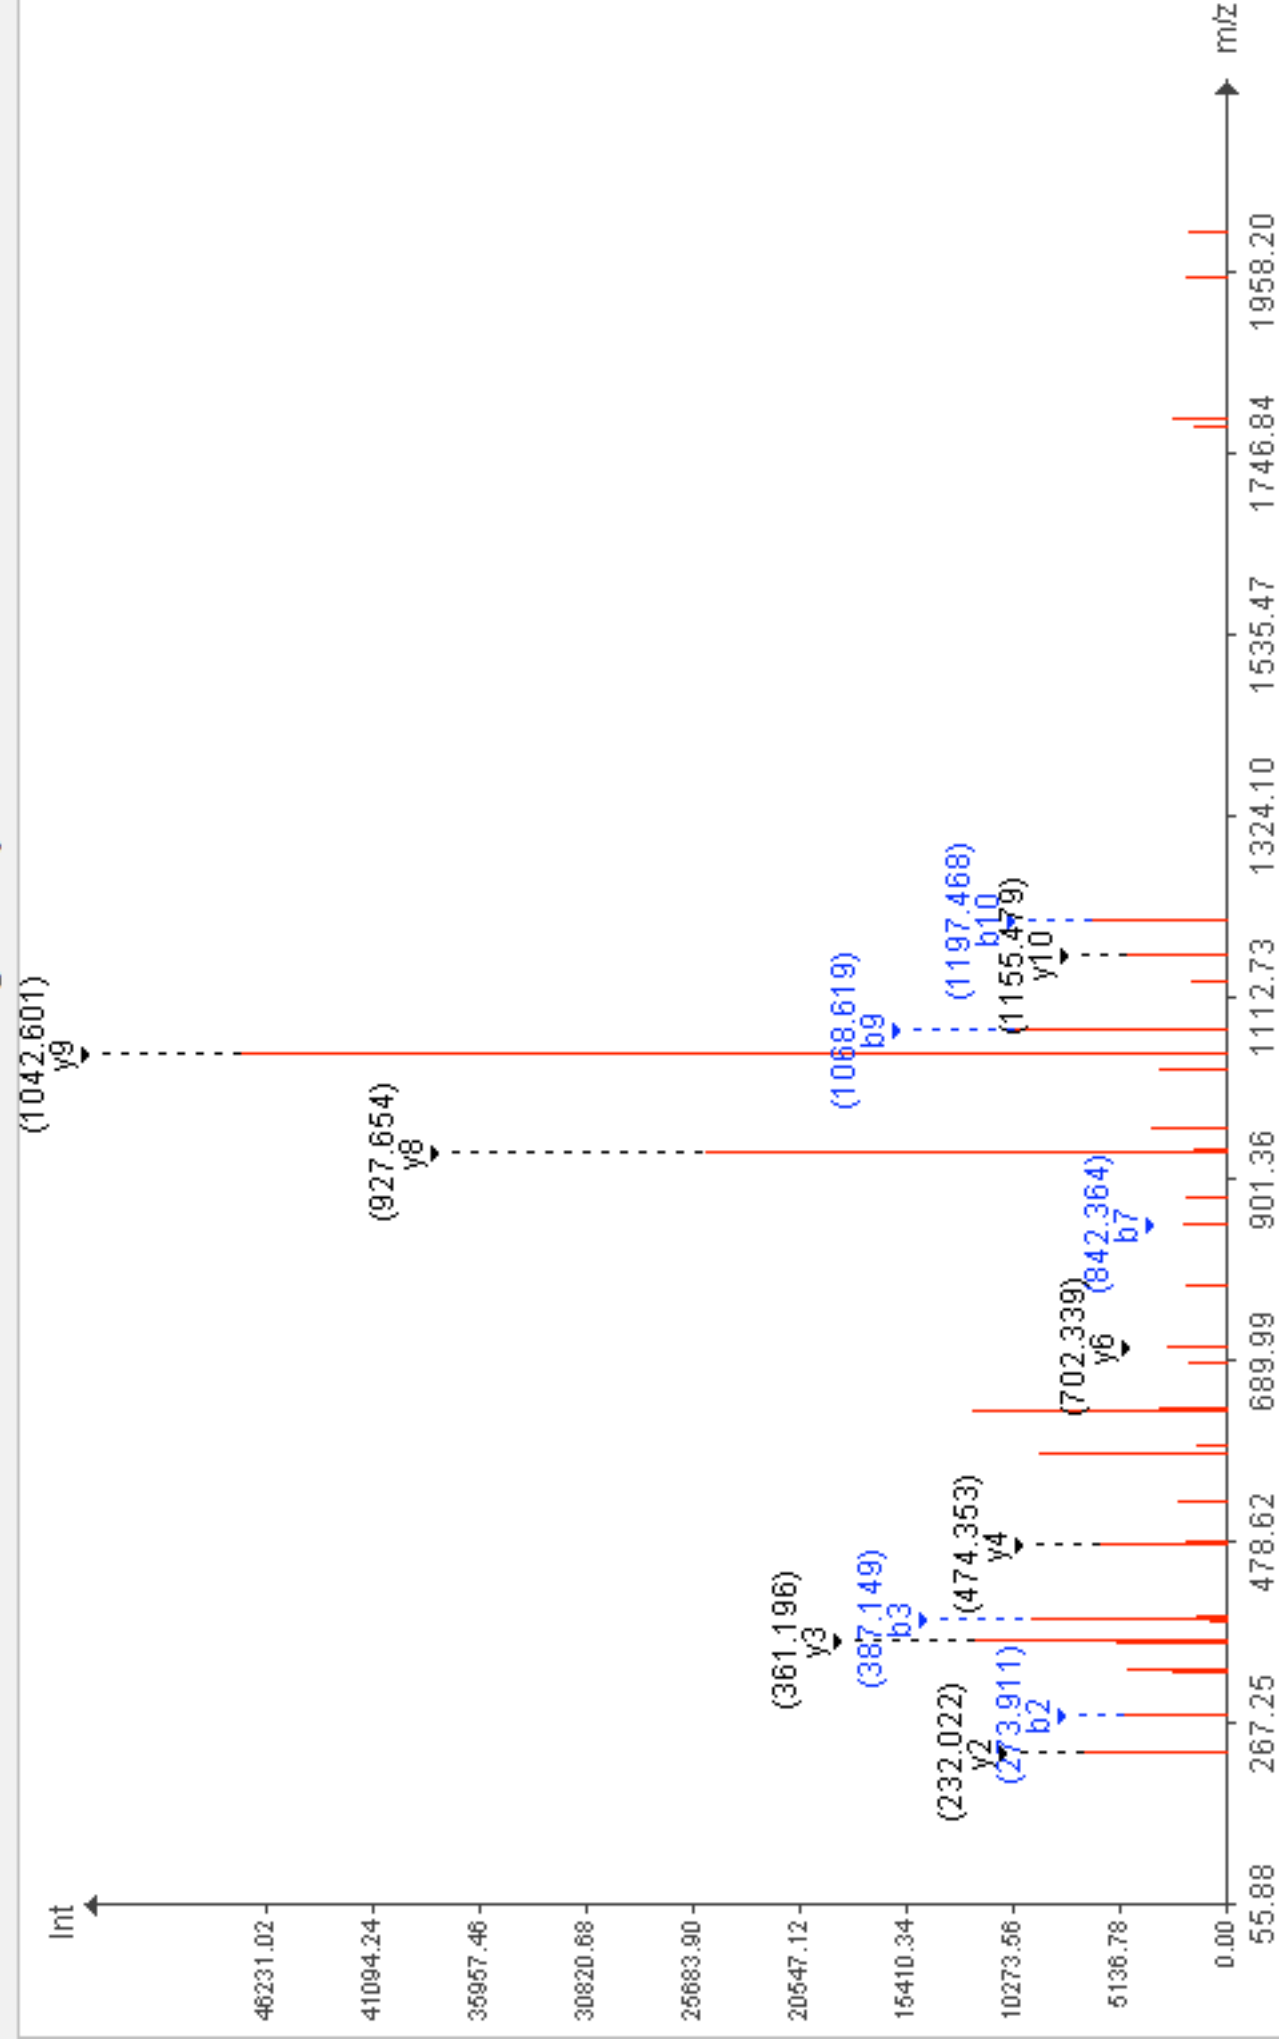

**AcD3-SPK(AcD3K\*)K(AcD3K\*)STVLQQQYNR-COOH**  
precursor mass: 906.5190 Da (charge: +2) protein: P26039 (425-438)  
score (threshold): 53.0 (42.0)  
instrument: Agilent Esquire HCT

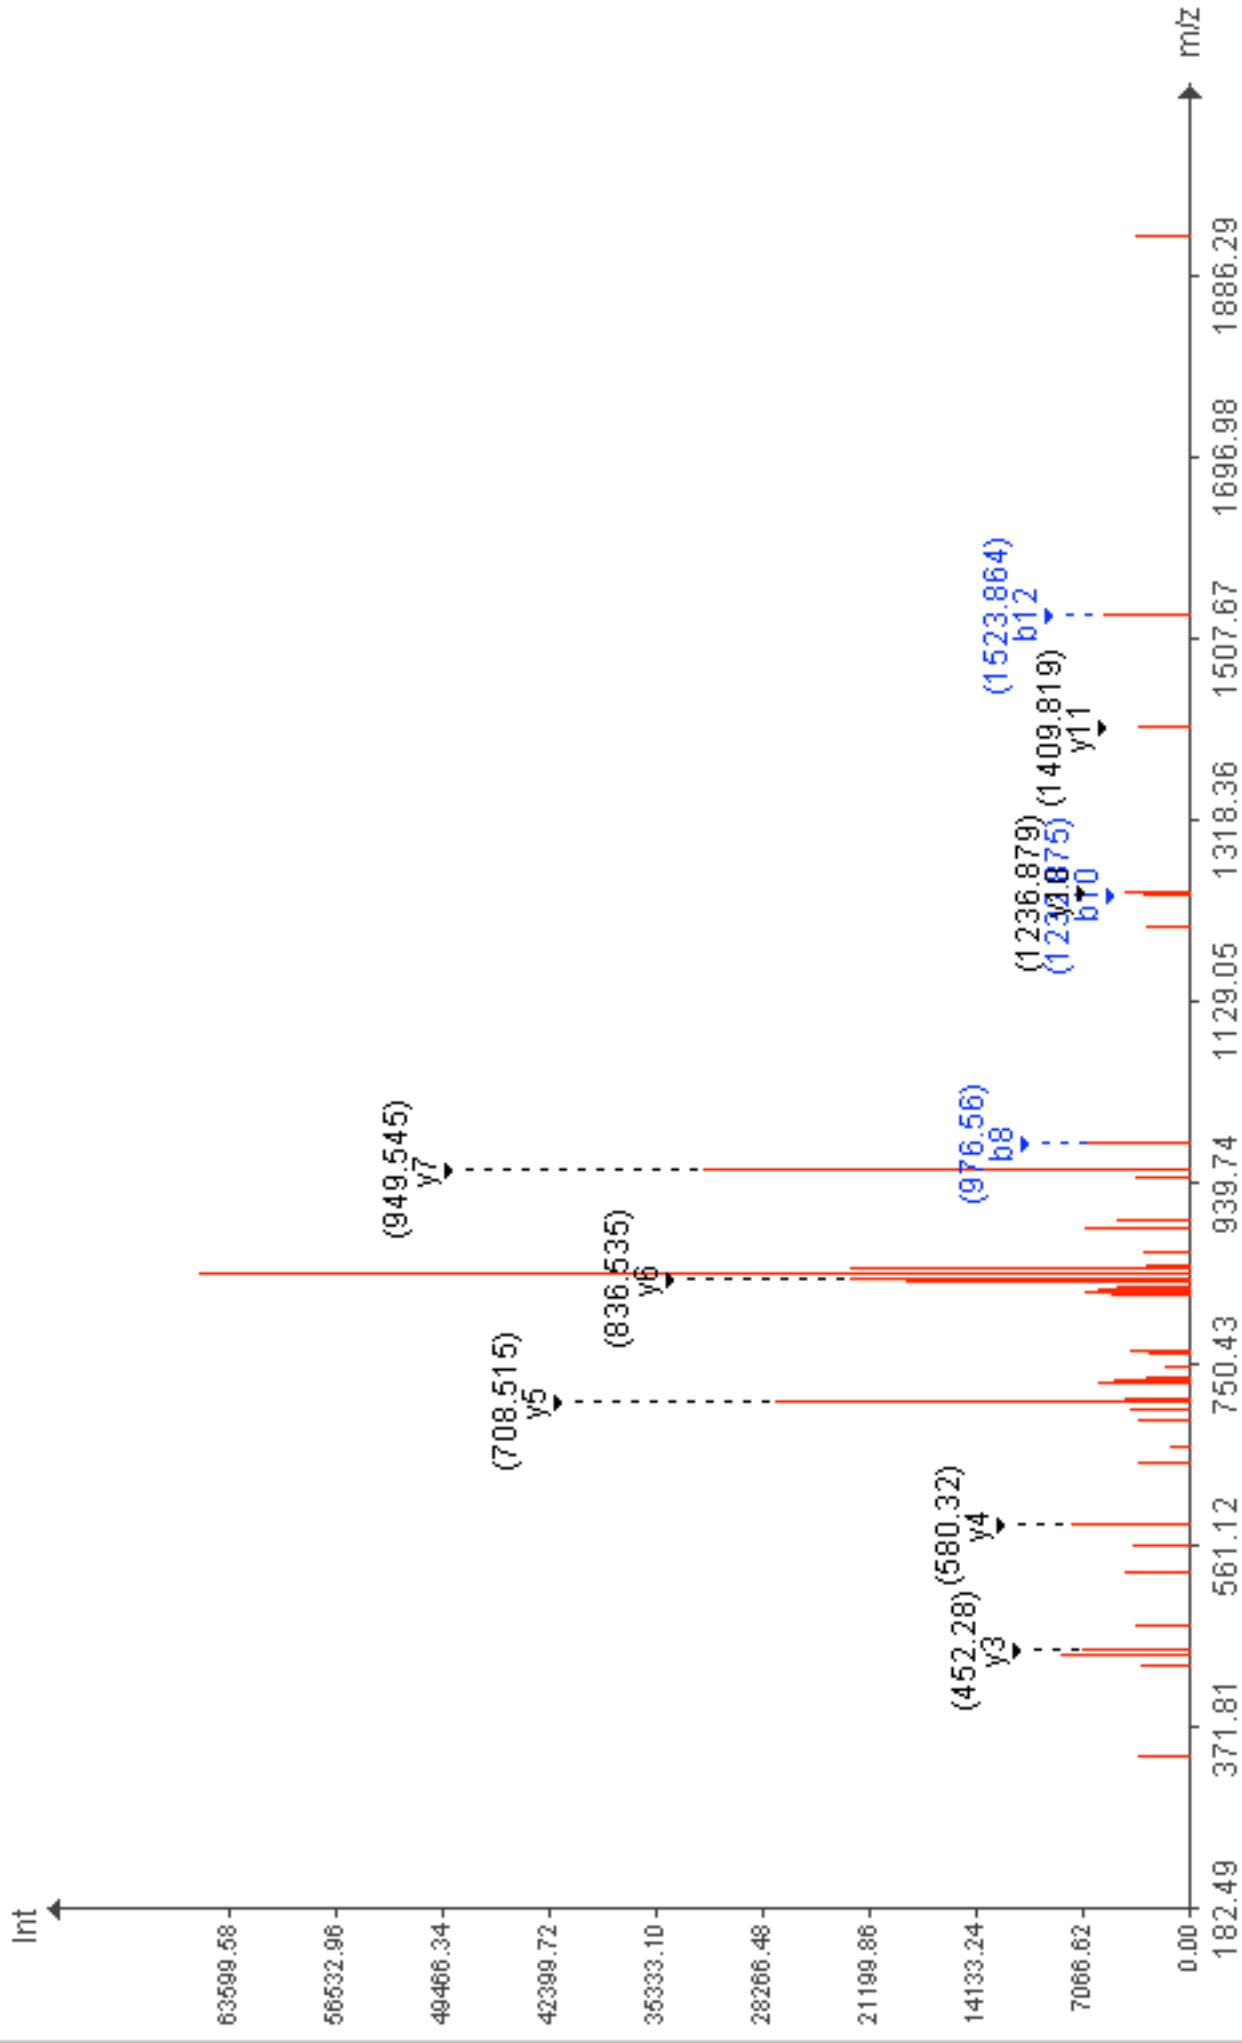

**AcD3-QPGGTLDLILR-COOH**

**precursor mass: 664.9490 Da (charge: +2) protein: Q62318 (732-743)**

**score (threshold): 42.0 (42.0)**

**instrument: Agilent Esquire HCT**

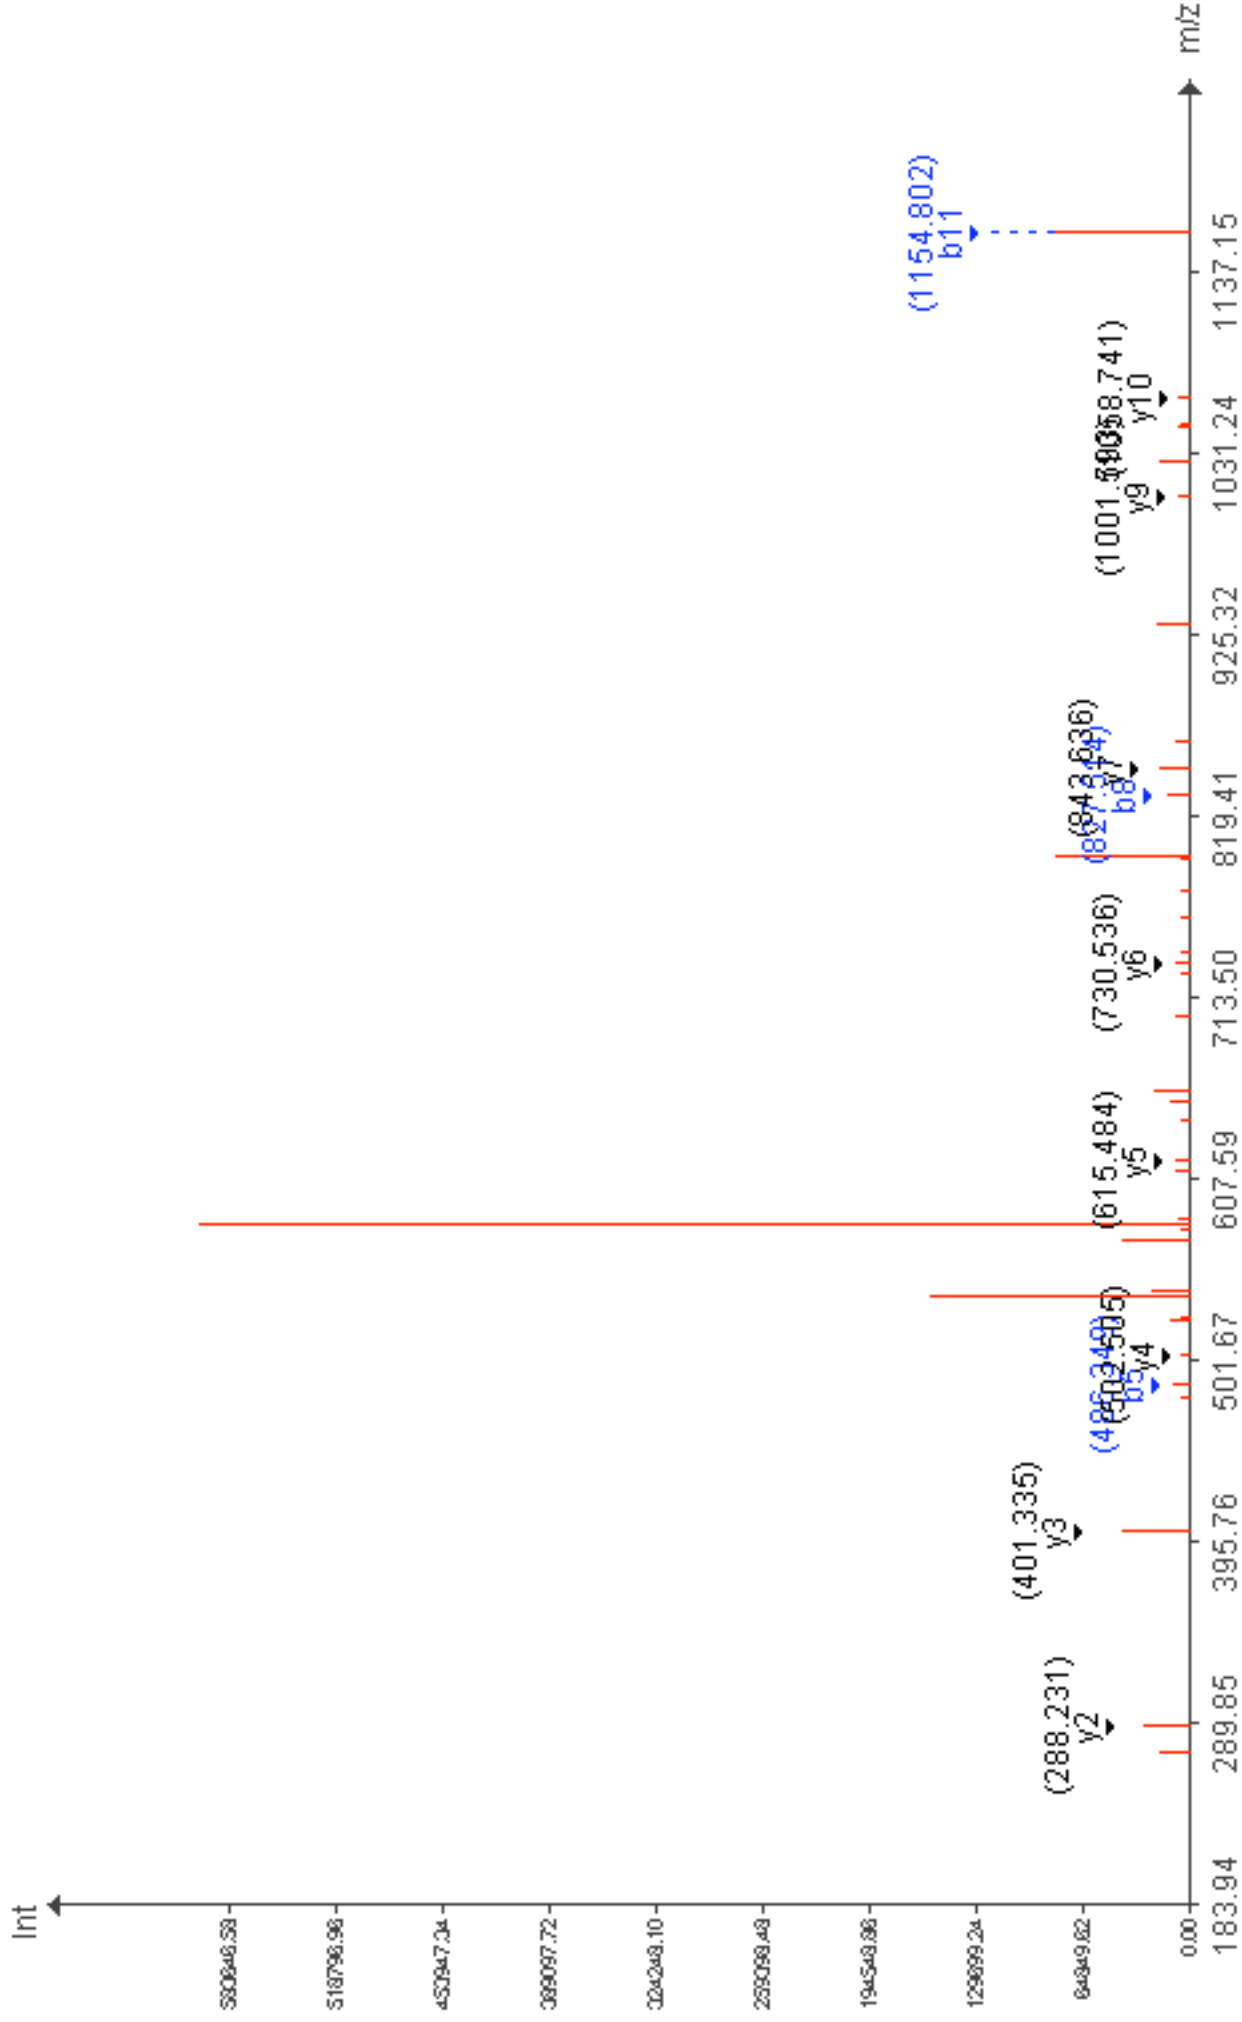

AcD3-GGTLDLTLIR-COOH

precursor mass: 552.3440 Da (charge: +2) protein: Q62318 (734-743)

score (threshold): 65.0 (42.0)

instrument: Agilent Esquire HCT

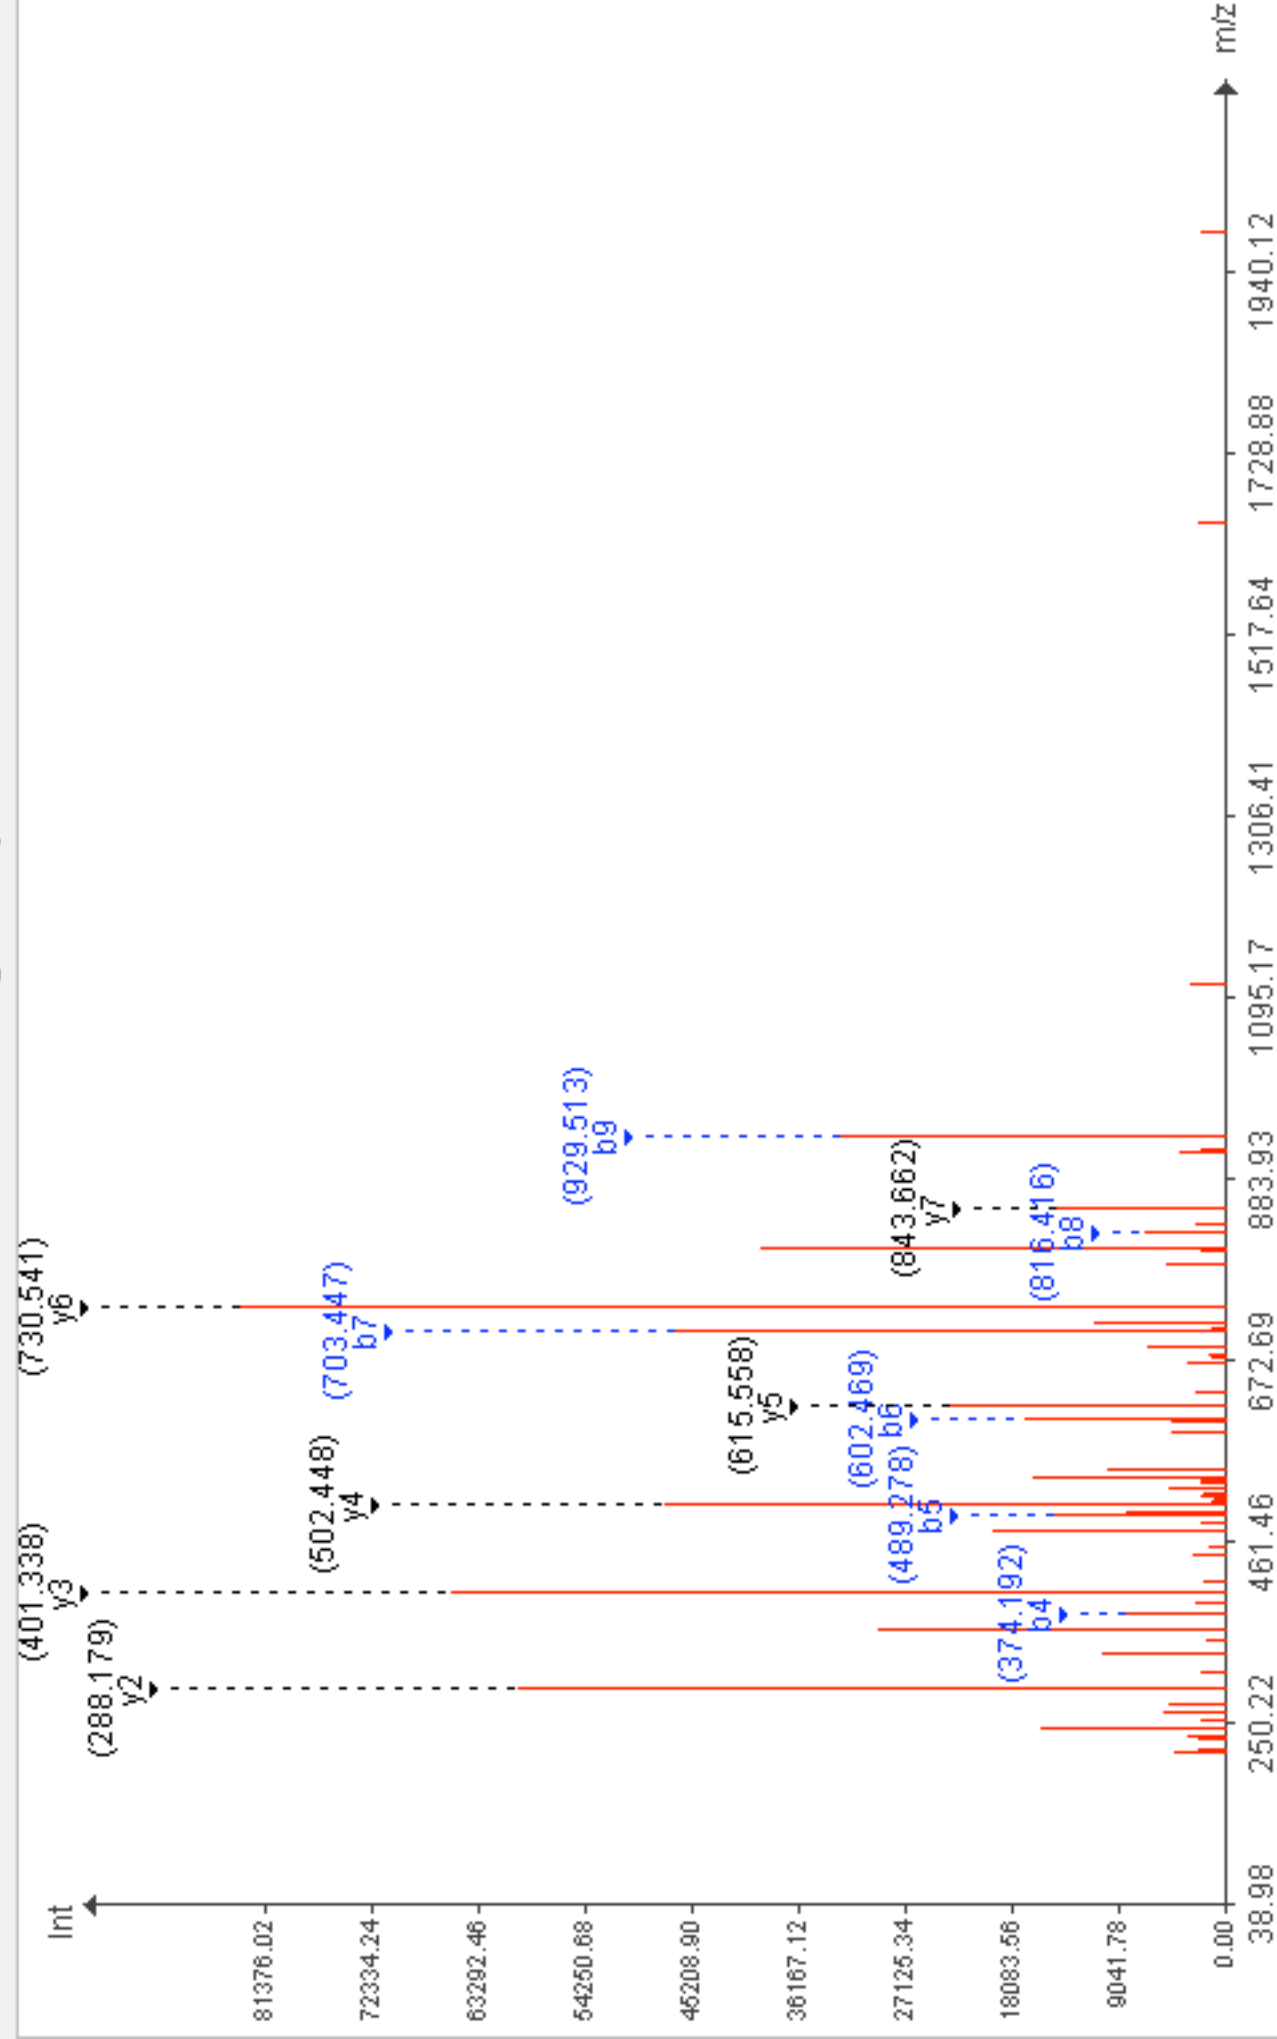



**AcD3-SSPALAK(AcD3K\*)GTQR-COOH**

precursor mass: 603.4240 Da (charge: +2) protein: O08784 (592-602)

score (threshold): 59.0 (42.0)

instrument: Agilent Esquire HCT

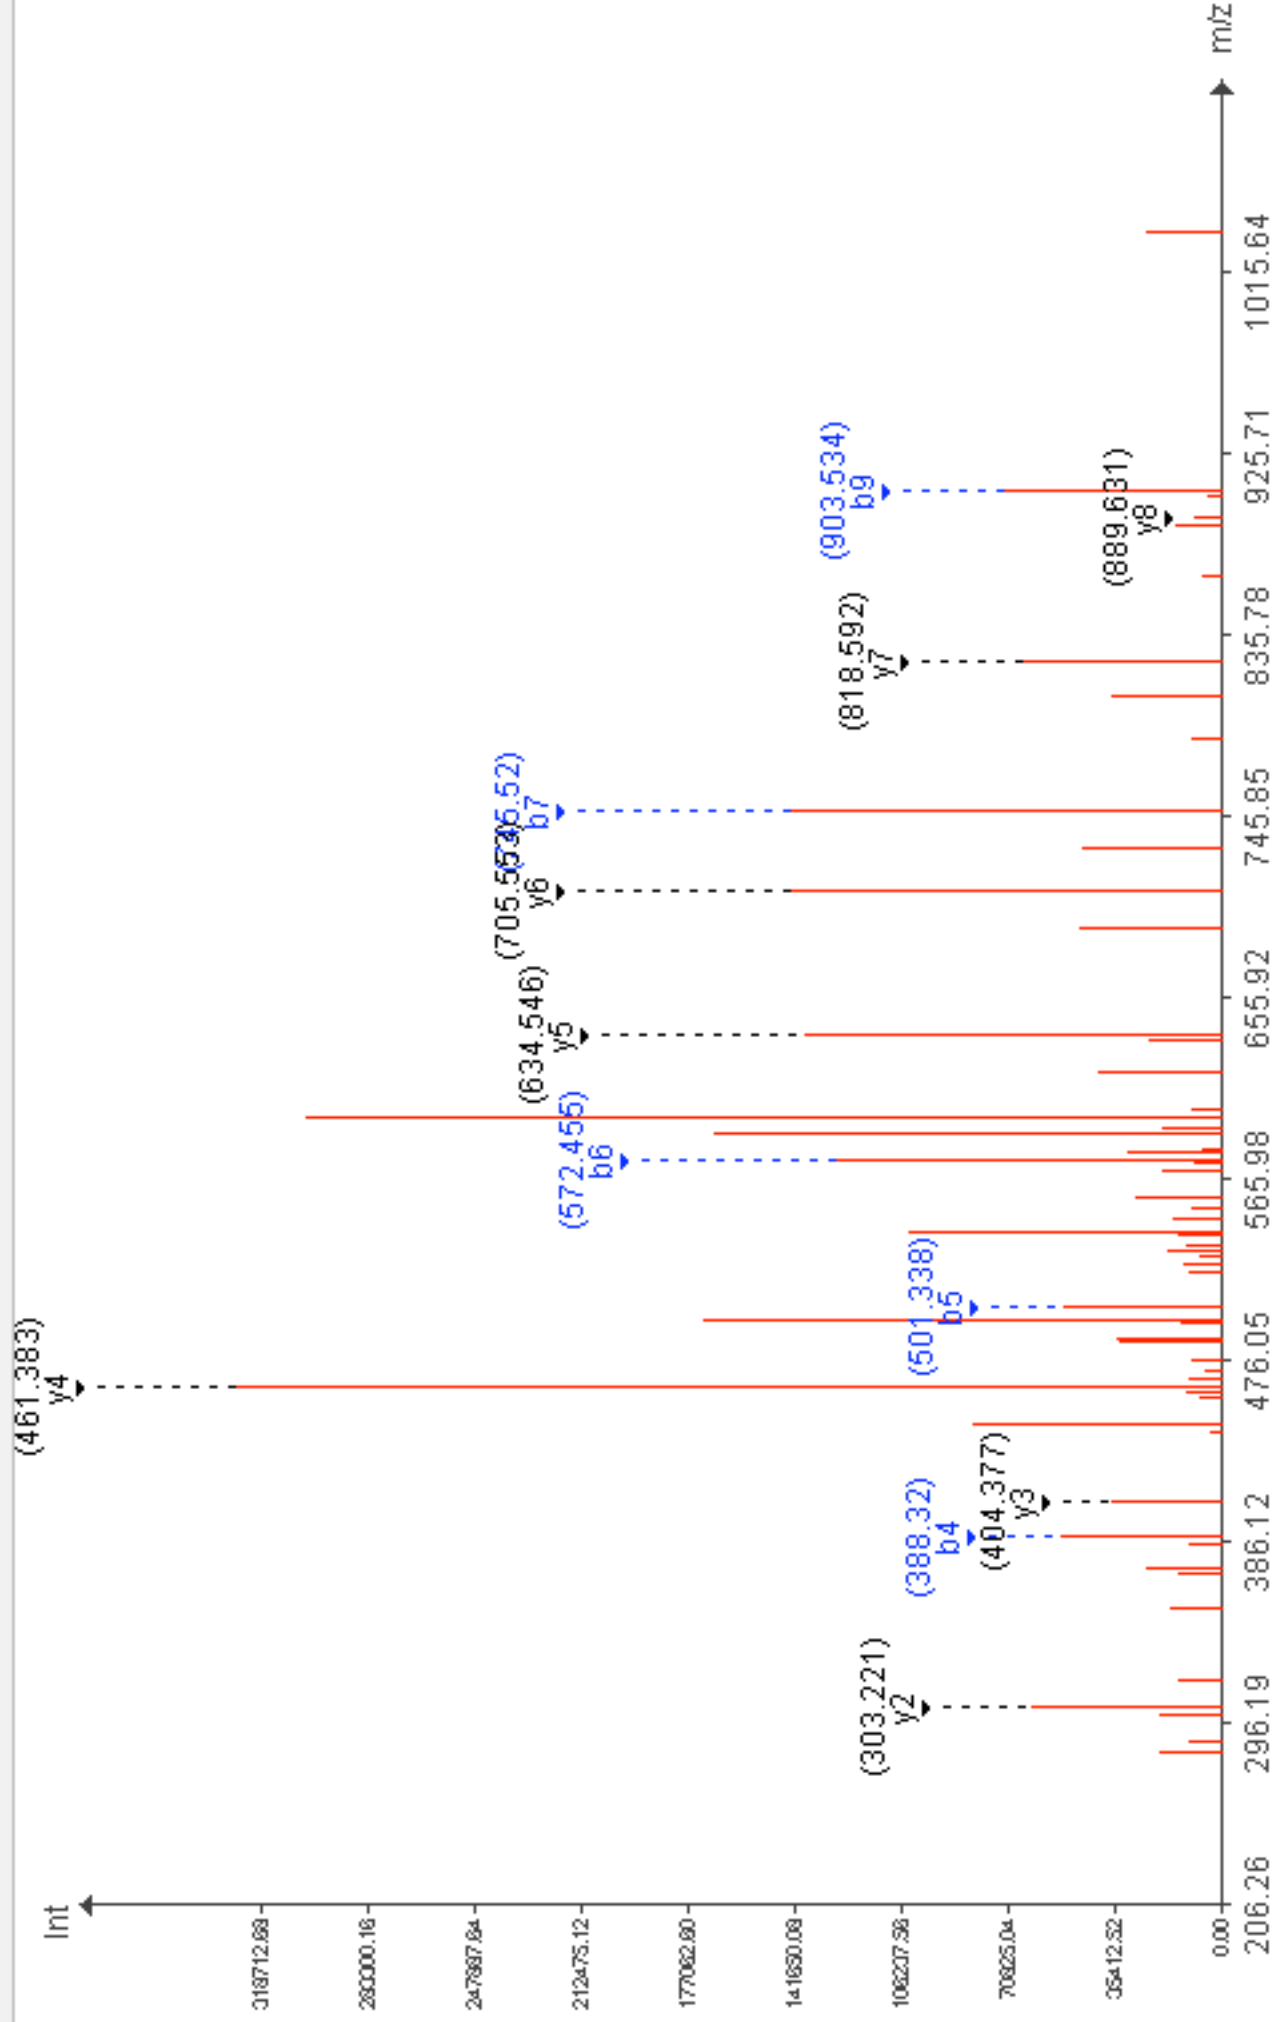

**Acd3-DVLGSSN(Dam)GVNQR-COOH**

precursor mass: 710.8760 Da (charge: +2) protein: Q9JHJ0 (151-163)

score (threshold): 76.0 (42.0)

instrument: Agilent Esquire HCT

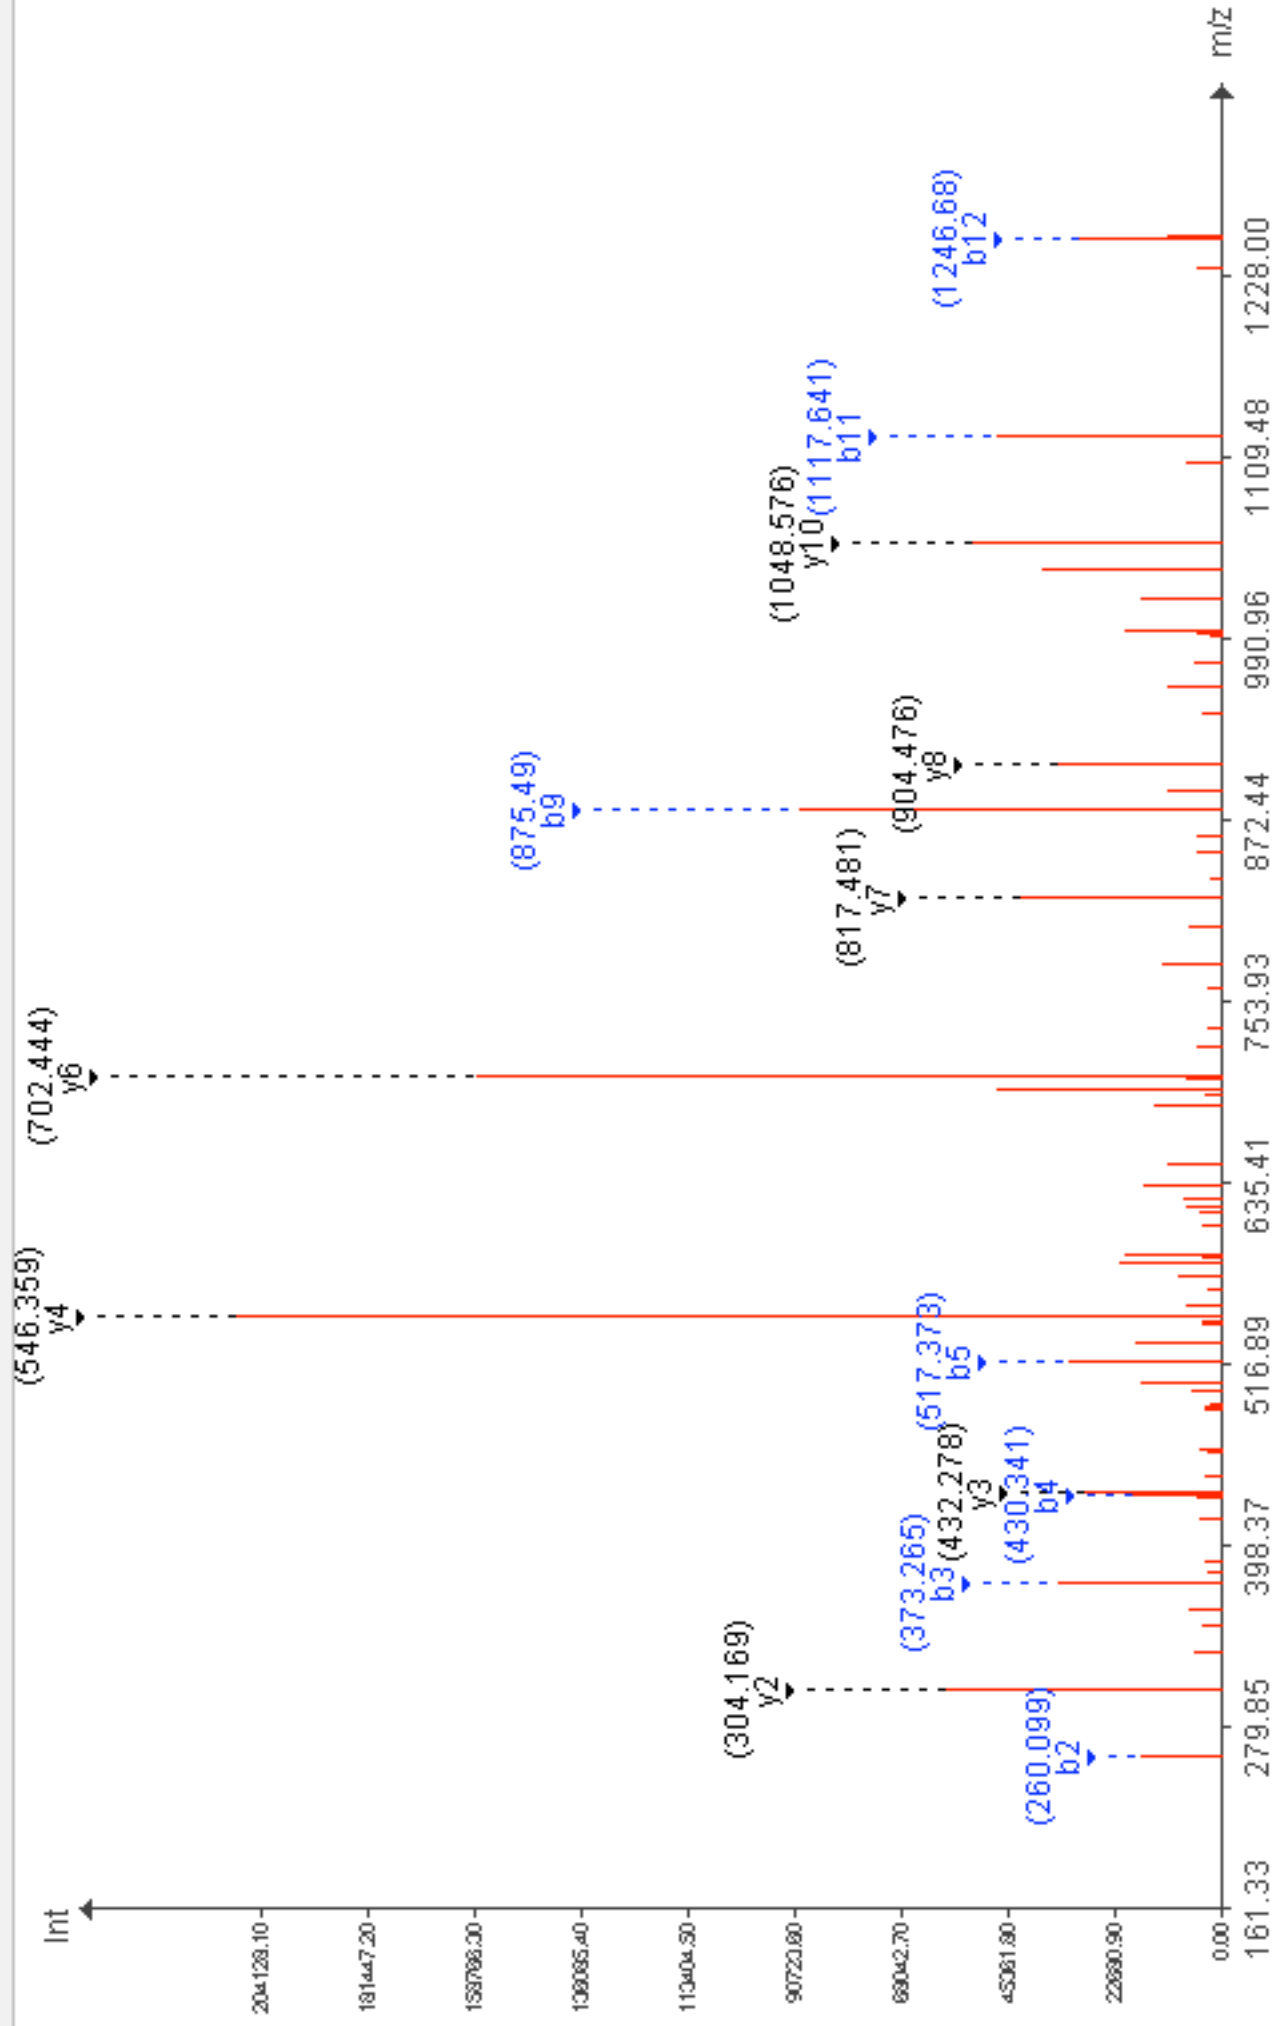

**AcD3-ALPFSQM(Mox)SELLTR-COOH**

precursor mass: 777.4160 Da (charge: +2) protein: Q8R5H6 (254-266)

score (threshold): 58.0 (47.0)

instrument: Agilent Esquire HCT

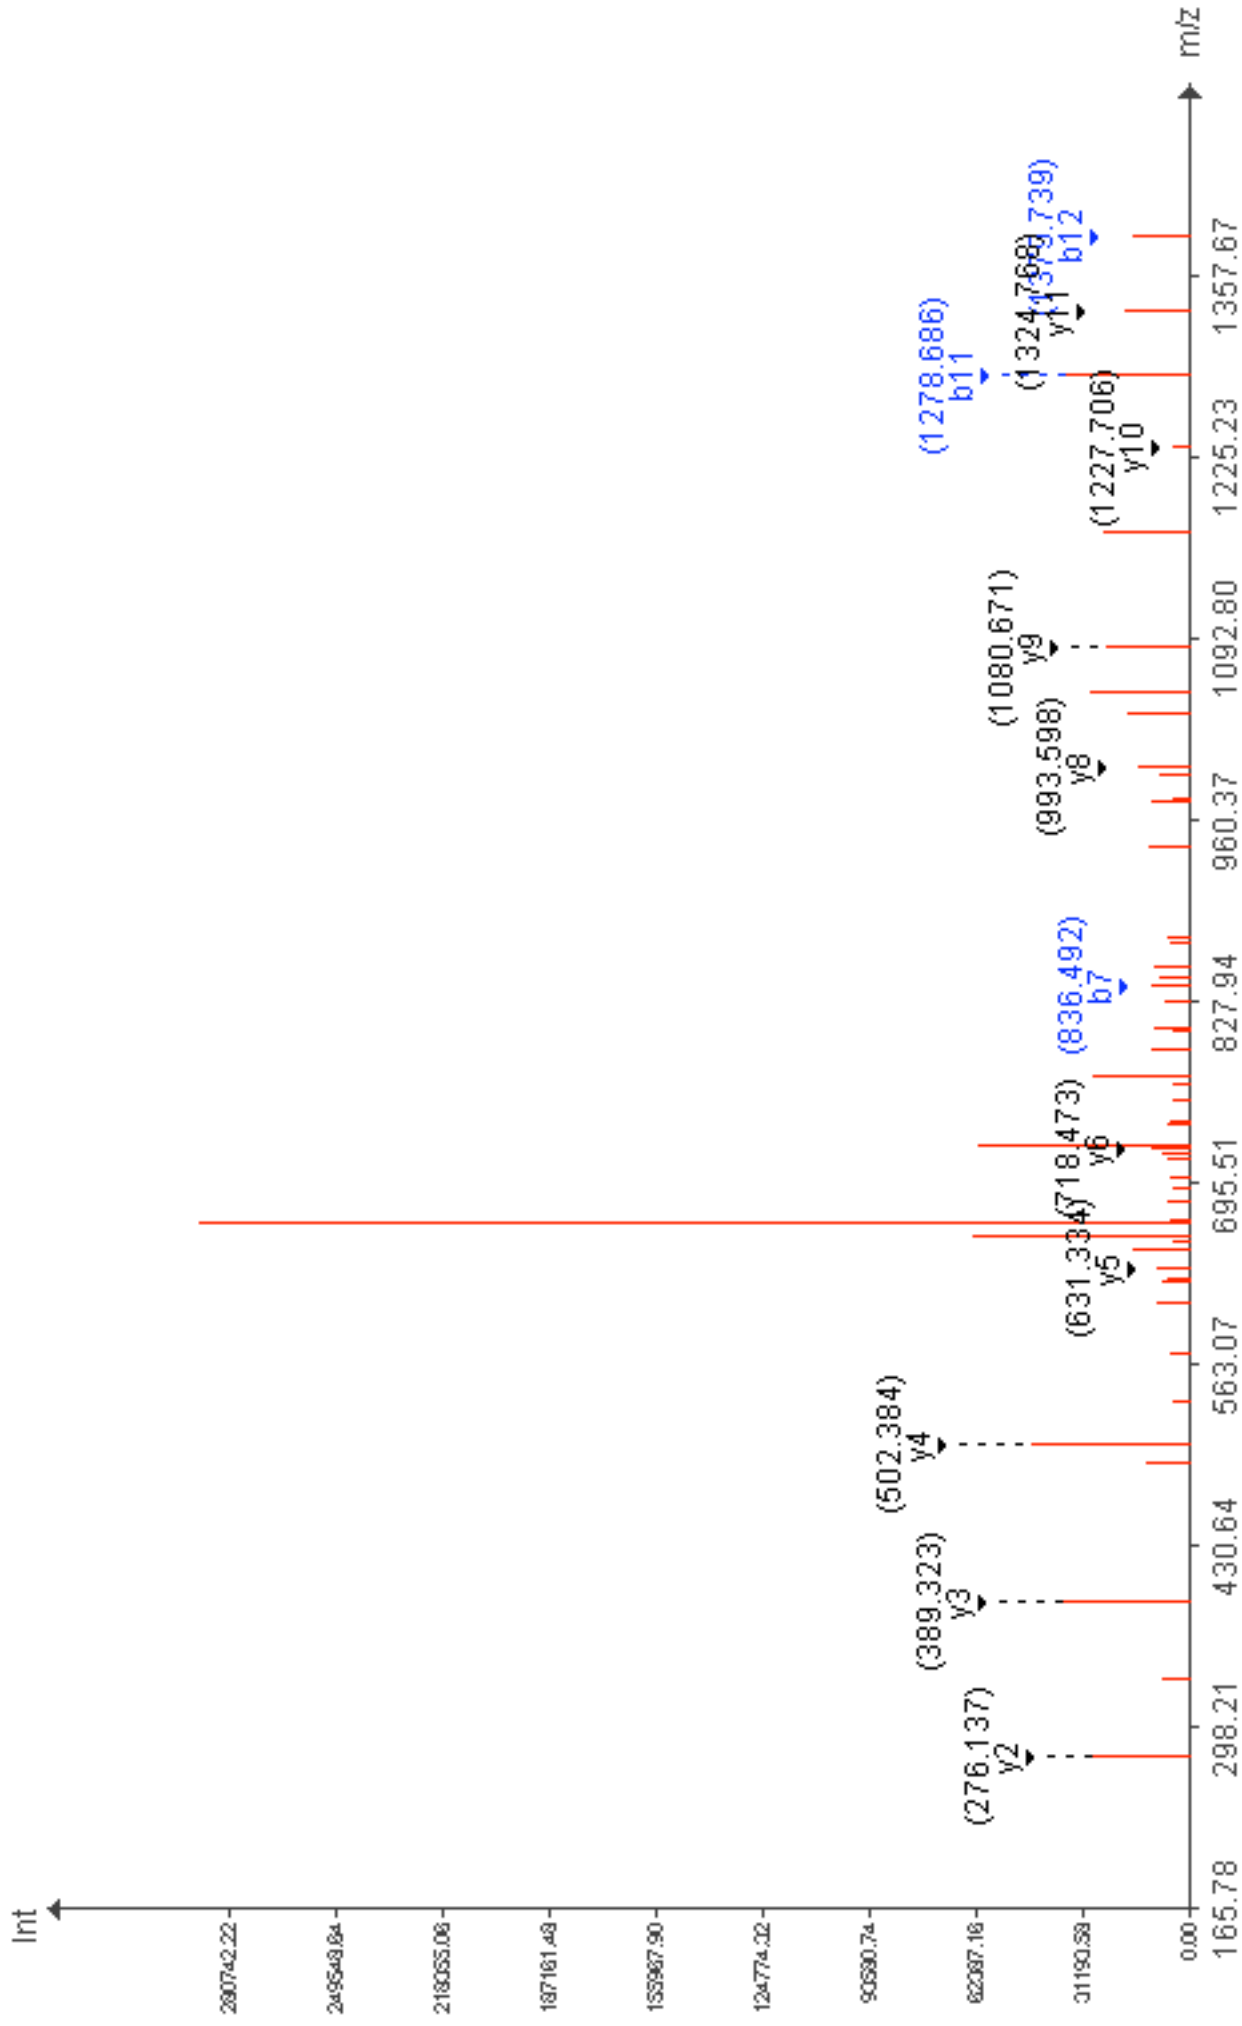

Supplement: M800132-MCP200_1.pdf [file M800132-MCP200_1.pdf]
